# Supplementary material for: Experimental evolution for the recovery of growth loss due to genome reduction
Source: eLife. 2024 May 1;13:RP93520. doi: 10.7554/eLife.93520 (PMC11062635; doi:10.7554/eLife.93520)
Supplement: Supplementary file 1. — The time and OD600 of overnight culture, the well (dilution rate) used for the serial transfer, and the calculated generation and growth rate are shown. All nine evolutionary lineages are summarized. [file elife-93520-supp1.xlsx]

## Sheet: Table S1
	A1					A2				B2				C2				D2				E2				F2				G2				H2
time (h)	dilution rate	Final OD	generation	growth rate (1/h)	time (h)	dilution rate	Final OD	generation	growth rate (1/h)	dilution rate	Final OD	generation	growth rate (1/h)	dilution rate	Final OD	generation	growth rate (1/h)	dilution rate	Final OD	generation	growth rate (1/h)	dilution rate	Final OD	generation	growth rate (1/h)	dilution rate	Final OD	generation	growth rate (1/h)	dilution rate	Final OD	generation	growth rate (1/h)	dilution rate	Final OD	generation	growth rate (1/h)
23.6167	1000	0.026	10.5788	0.310486	23.6333	1000	0.015	9.62475	0.282286	1000	0.013	9.4183	0.267552	1000	0.009	8.88778	0.260672	1000	0.009	8.88778	0.260672	1000	0.009	9.04825	0.265378	1000	0.008	8.71786	0.255688	1000	0.01	9.03978	0.26513	1000	0.009	8.88778	0.260672
23.2	1000	0.01	19.166	0.256562	23.55	1000	0.011	19.1431	0.294317	100	0.094	18.9163	0.293688	100	0.098	18.9764	0.296939	100	0.069	18.4702	0.28204	100	0.11	19.3035	0.301844	100	0.057	18.1946	0.278929	100	0.126	19.339	0.303137	100	0.093	18.9009	0.294715
23.1667	100	0.021	26.8803	0.23081	23.8	1000	0.009	28.8194	0.286628	1000	0.053	28.0554	0.270716	1000	0.115	29.173	0.296963	1000	0.05	27.9714	0.276709	10000	0.008	28.8099	0.276861	1000	0.041	27.685	0.276398	10000	0.008	28.6494	0.271155	10000	0.032	30.6494	0.342163
23.6333	1000	0.013	36.1542	0.271996	22.9833	1000	0.096	42.2002	0.4018	1000	0.033	37.3377	0.278728	10000	0.011	39.0746	0.298621	1000	0.07	38.4226	0.315195	1000	0.046	41.2992	0.376662	1000	0.033	37.3377	0.291111	1000	0.011	39.0746	0.314411	10000	0.081	45.277	0.441148
24.8333	1000	0.066	48.4639	0.343589	23.4667	100000	0.014	56.0322	0.403407	1000	0.03	47.166	0.286639	1000	0.058	51.439	0.365212	10000	0.033	50.6254	0.360441	100000	0.019	56.6332	0.452929	1000	0.088	48.7185	0.336161	1000	0.085	51.9904	0.381499	100000	0.024	60.1317	0.438773
22.25	100000	0.01	62.3511	0.432623	24.4	10000	0.041	70.8701	0.438899	10000	0.052	61.2472	0.416517	100000	0.01	65.5126	0.399798	100000	0.009	65.3606	0.418592	100000	0.019	73.2429	0.471841	10000	0.061	61.4775	0.362454	100000	0.03	67.0975	0.429159	100000	0.014	75.9638	0.449751
24.8333	10000	0.031	77.2711	0.416446	22.4167	100000	0.016	86.1222	0.448915	100000	0.013	75.8569	0.430006	10000	0.006	78.0633	0.388082	10000	0.01	78.8003	0.41557	10000	0.067	88.3488	0.46709	10000	0.028	73.6418	0.376134	10000	0.052	81.1788	0.435408	10000	0.026	90.1446	0.438485
23.8667	10000	0.08	91.9265	0.42563	23.4	10000	0.039	100.695	0.418563	10000	0.022	89.9036	0.403443	10000	0.025	93.4099	0.454592	10000	0.011	92.2255	0.397677	100000	0.024	103.477	0.448132	10000	0.027	86.8771	0.39205	100000	0.01	95.4099	0.42155	10000	0.07	104.861	0.435929
22.5833	100000	0.016	106.214	0.438531	23.0833	10000	0.081	115.037	0.433484	10000	0.037	103.941	0.424283	100000	0.021	109.768	0.491202	10000	0.025	106.698	0.43457	10000	0.083	118.555	0.452756	10000	0.015	99.3168	0.37354	10000	0.018	109.546	0.424468	100000	0.011	118.801	0.418584
24.1333	100000	0.012	122.409	0.465134	23.7667	100000	0.028	130.115	0.433339	100000	0.082	121.699	0.510383	100000	0.008	124.985	0.443808	10000	0.01	118.663	0.348978	100000	0.01	132.112	0.395372	1000	0.076	111.624	0.358924	10000	0.013	122.364	0.373839	10000	0.018	132.799	0.408253
23.2833	100000	0.024	140.018	0.524241	23.4333	100000	0.01	145.239	0.441093	100000	0.023	136.475	0.430927	100000	0.011	142.054	0.504895	10000	0.063	134.606	0.471588	100000	0.009	148.569	0.486809	100000	0.009	125.155	0.40026	10000	0.108	138.706	0.483394	10000	0.075	148.146	0.453946
23.8333	100000	0.054	157.798	0.517085	23.55	10000	0.03	160.112	0.448215	10000	0.051	150.911	0.435073	100000	0.023	159.728	0.520192	100000	0.046	150.762	0.475517	100000	0.017	166.096	0.515877	10000	0.023	139.797	0.430939	1000000	0.011	155.342	0.489651	100000	0.034	163.614	0.455278
24.2	1000000	0.015	175.882	0.517958	24.1333	100000	0.025	176.458	0.458729	100000	0.024	166.433	0.435593	100000	0.021	176.207	0.473285	100000	0.02	166.17	0.442542	100000	0.041	183.976	0.513534	10000	0.051	154.233	0.414641	100000	0.011	171.952	0.477055	100000	0.013	178.837	0.437217
23.2833	100000	0.034	193.672	0.529616	22.9333	100000	0.051	194.096	0.514052	100000	0.023	182.982	0.482286	100000	0.021	192.816	0.502017	10000	0.098	181.751	0.470912	100000	0.058	201.086	0.517142	100000	0.01	168.492	0.430975	10000	0.071	187.93	0.482927	10000	0.056	194.231	0.465294
23.8167	1000000	0.012	212.101	0.536349	24.1167	100000	0.069	211.142	0.497832	100000	0.018	199.238	0.474767	100000	0.033	210.078	0.496126	100000	0.048	197.331	0.447788	1000000	0.016	219.16	0.519461	10000	0.061	184.389	0.456889	100000	0.082	204.747	0.483357	100000	0.03	209.94	0.451504
23.5667	100000	0.019	229.374	0.508025	23.7667	100000	0.073	227.833	0.485085	100000	0.012	215.262	0.465722	100000	0.048	227.228	0.50018	100000	0.017	212.443	0.440741	100000	0.027	236.524	0.506431	10000	0.098	198.361	0.40748	1000000	0.012	221.906	0.500436	100000	0.031	226.597	0.485794
24.1333	100000	0.061	247.666	0.525388	23	100000	0.09	244.745	0.494959	10000	0.089	231.441	0.4735	100000	0.083	244.628	0.524372	10000	0.08	227.965	0.467789	100000	0.052	254.08	0.529058	100000	0.029	213.213	0.44762	100000	0.009	238.101	0.488054	100000	0.012	241.838	0.459298
23.6	1000000	0.015	265.574	0.525961	24.7	1000000	0.017	262.272	0.507969	1000000	0.011	248.356	0.490234	1000000	0.021	262.577	0.503692	100000	0.06	244.16	0.454463	1000000	0.019	272.559	0.518571	100000	0.025	229.609	0.460101	100000	0.017	255.628	0.491859	100000	0.018	259.032	0.482526
24.0667	100000	0.054	284.031	0.531601	23.7833	100000	0.049	280.409	0.541487	100000	0.03	266.413	0.539105	100000	0.06	280.701	0.528216	100000	0.049	260.477	0.47556	1000000	0.014	292.05	0.56805	100000	0.021	245.967	0.476744	100000	0.07	274.279	0.543583	100000	0.035	276.601	0.512035
23.6833	1000000	0.016	302.208	0.531982	23.7333	100000	0.069	297.512	0.500924	1000000	0.019	285.686	0.564454	1000000	0.013	298.426	0.517673	100000	0.036	276.642	0.472105	100000	0.056	310.659	0.543506	100000	0.016	262.184	0.473637	1000000	0.012	291.667	0.507806	100000	0.029	292.94	0.477172
24.8167	1000000	0.011	321.599	0.541604	23.85	100000	0.05	313.657	0.45708	100000	0.023	302.571	0.478039	100000	0.023	315.859	0.506644	100000	0.023	292.605	0.463937	1000000	0.019	329.031	0.533945	100000	0.015	278.701	0.480016	100000	0.015	308.598	0.492078	100000	0.024	309.276	0.474788
24.1	100000	0.019	338.997	0.500393	23.6833	100000	0.03	329.53	0.480441	1000000	0.01	321.301	0.566926	100000	0.04	333.267	0.509485	100000	0.01	308.013	0.450951	100000	0.053	347.121	0.529435	10000	0.044	293.541	0.434334	100000	0.024	325.886	0.505965	100000	0.023	325.825	0.484322
22.5	100000	0.02	355.681	0.513965	23.9167	1000000	0.011	348.014	0.516621	1000000	0.036	343.081	0.608728	1000000	0.011	351.336	0.523674	10000	0.092	324.503	0.47789	1000000	0.03	366.232	0.553857	100000	0.028	309.499	0.462478	100000	0.072	344.081	0.527312	100000	0.043	343.337	0.507539
24.65	100000	0.075	374.197	0.520677	23.2167	10000	0.039	363.128	0.438939	100000	0.09	361.012	0.520777	100000	0.03	369.393	0.539105	100000	0.067	340.655	0.482232	1000000	0.019	385.504	0.575395	100000	0.028	326.108	0.495891	1000000	0.019	362.09	0.537686	100000	0.086	360.947	0.525746
23.1167	1000000	0.021	392.292	0.542576	23.6667	1000000	0.014	381.581	0.52819	1000000	0.029	379.31	0.52373	100000	0.067	387.162	0.520412	100000	0.05	356.842	0.474095	100000	0.09	404.358	0.552182	100000	0.02	342.233	0.472245	100000	0.035	379.581	0.512275	100000	0.089	377.606	0.48791
23.6167	100000	0.076	410.758	0.541954	24.4833	100000	0.025	399.027	0.505268	1000000	0.022	398.843	0.565707	1000000	0.013	404.728	0.497308	100000	0.014	371.615	0.418242	1000000	0.01	421.119	0.474539	10000	0.043	356.625	0.407453	100000	0.034	396.149	0.469051	100000	0.088	394.199	0.469774
23.75	1000000	0.032	429.441	0.545285	22.9	100000	0.013	414.694	0.469748	1000000	0.024	418.9	0.601407	100000	0.009	420.807	0.48669	10000	0.04	386.418	0.448042	100000	0.015	438.314	0.520454	10000	0.078	370.771	0.428203	100000	0.034	412.759	0.502748	100000	0.069	410.458	0.492126
23.6833	1000000	0.014	448.18	0.548438	24.8	10000	0.049	429.896	0.445548	1000000	0.013	437.947	0.558241	100000	0.037	439.456	0.521235	100000	0.034	402.793	0.457678	1000000	0.01	457.661	0.540728	1000000	0.018	388.588	0.497951	1000000	0.013	431.303	0.51831	1000000	0.016	428.281	0.498145
24.1	100000	0.036	466.152	0.516904	23.8667	100000	0.023	445.414	0.435196	1000000	0.008	457.178	0.539312	100000	0.036	456.026	0.481237	100000	0.008	417.315	0.42176	100000	0.011	474.408	0.486379	100000	0.009	404.197	0.453343	10000	0.063	446.868	0.452033	100000	0.013	444.591	0.473685
23.55	100000	0.088	484.052	0.526826	24.2167	100000	0.012	461.085	0.469892	1000000	0.018	478.28	0.632723	1000000	0.013	474.488	0.528435	100000	0.01	434.247	0.484628	100000	0.08	493.88	0.557346	100000	0.058	423.495	0.552353	1000000	0.02	465.144	0.523115	100000	0.041	462.858	0.522844
23.1	1000000	0.022	501.983	0.538061	23.9333	100000	0.017	478.197	0.49942	1000000	0.028	498.849	0.600309	100000	0.037	492.607	0.524745	10000	0.023	448.736	0.419634	1000000	0.06	513.396	0.56523	1000000	0.037	442.778	0.558467	100000	0.059	483.314	0.526242	100000	0.064	480.11	0.499648
24.1333	1000000	0.019	521.703	0.566391	23.1167	100000	0.012	494.304	0.466488	1000000	0.047	519.527	0.598891	100000	0.049	509.622	0.510187	10000	0.03	462.407	0.409923	1000000	0.017	531.508	0.543088	100000	0.018	458.348	0.466866	100000	0.045	499.533	0.486318	100000	0.055	496.501	0.49148
23.8	1000000	0.028	542.194	0.596776	23.65	100000	0.008	510.329	0.464423	10000000	0.017	541.314	0.631407	100000	0.079	526.92	0.507	10000	0.044	476.247	0.405638	100000	0.046	549.554	0.528894	10000	0.032	472.466	0.413772	100000	0.018	514.821	0.448061	100000	0.05	512.973	0.482774
24.5833	100000	0.047	559.551	0.489391	24.7167	100000	0.025	528.582	0.501084	1000000	0.015	561.065	0.542192	1000000	0.027	545.303	0.515519	10000	0.073	490.265	0.39312	1000000	0.016	567.962	0.516229	10000	0.067	486.82	0.402534	10000	0.058	529.797	0.419976	100000	0.096	530.524	0.492188
23.7167	1000000	0.014	577.735	0.531458	23.1167	100000	0.012	544.133	0.480132	1000000	0.023	581.613	0.63443	100000	0.039	562.443	0.513943	10000	0.071	503.513	0.397227	100000	0.037	585.781	0.534301	100000	0.009	500.533	0.411195	100000	0.032	545.548	0.472309	100000	0.098	547.163	0.498928
23.3	100000	0.034	595.625	0.532199	23.75	100000	0.016	561.158	0.476471	1000000	0.013	600.721	0.53479	1000000	0.019	581.337	0.551427	100000	0.042	519.365	0.462649	1000000	0.022	604.963	0.559816	10000	0.073	516.841	0.47594	100000	0.044	562.617	0.498163	1000000	0.027	565.235	0.527427
23.6667	1000000	0.012	614.054	0.539749	23.9333	100000	0.016	577.768	0.502748	1000000	0.013	620.653	0.603297	100000	0.055	599.48	0.525452	100000	0.015	534.489	0.438021	1000000	0.009	623.605	0.539904	100000	0.017	531.348	0.420154	100000	0.039	579.053	0.476001	100000	0.057	582.922	0.512262
23.2833	100000	0.019	631.327	0.514207	23.9167	100000	0.023	594.901	0.497591	1000000	0.017	640.972	0.590102	100000	0.046	615.832	0.473905	10000	0.054	549.625	0.43866	1000000	0.026	645.067	0.622009	100000	0.011	547.33	0.463175	100000	0.025	595.021	0.462784	1000000	0.017	601.109	0.527066
23.6333	100000	0.041	649.046	0.519692	25.25	100000	0.017	611.074	0.441364	1000000	0.01	660.138	0.523027	1000000	0.041	635.598	0.542592	10000	0.085	563.567	0.382733	1000000	0.075	666.527	0.589105	100000	0.056	566.287	0.520411	1000000	0.011	613.768	0.514635	1000000	0.011	620.412	0.529909
23.6833	1000000	0.01	666.942	0.523766	22.45	10000	0.054	626.029	0.464848	1000000	0.017	680.835	0.643325	1000000	0.013	653.872	0.564227	100000	0.018	577.937	0.443681	1000000	0.021	684.622	0.558688	100000	0.018	581.259	0.462269	100000	0.016	630.918	0.529515	100000	0.02	637.884	0.539455
24.15	100000	0.044	685.689	0.538076	24.7667	100000	0.03	641.791	0.451452	1000000	0.019	700.927	0.575485	1000000	0.024	674.688	0.582582	100000	0.017	594.465	0.462548	1000000	0.024	704.746	0.563218	100000	0.018	597.869	0.464856	100000	0.078	649.813	0.528817	100000	0.085	656.581	0.523278
23.6333	1000000	0.017	704.249	0.544339	22.9	100000	0.021	657.886	0.457536	1000000	0.028	721.418	0.582499	1000000	0.008	693.035	0.555323	10000	0.1	610.309	0.479576	100000	0.082	723.128	0.556401	100000	0.009	613.479	0.472479	1000000	0.018	667.63	0.539265	1000000	0.017	674.191	0.533016
23.2	100000	0.029	721.629	0.519268	23.8667	100000	0.02	674.425	0.496283	1000000	0.045	742.034	0.618613	100000	0.056	712.452	0.563918	100000	0.069	626.383	0.466838	1000000	0.037	741.912	0.545519	10000	0.009	626.766	0.385908	100000	0.047	685.624	0.522599	100000	0.039	691.999	0.517176
24.6333	1000000	0.016	740.703	0.536704	25.4	100000	0.011	690.173	0.443102	1000000	0.028	761.281	0.541585	1000000	0.049	732.191	0.538661	100000	0.06	642.791	0.447762	1000000	0.017	760.722	0.513299	10000	0.005	639.206	0.339471	100000	0.048	702.264	0.454094	100000	0.066	709.367	0.473977
23.9333	1000000	0.01	759.956	0.557612	22.3	10000	0.018	704.171	0.424631	1000000	0.034	781.493	0.613115	1000000	0.011	749.967	0.552537	100000	0.021	657.886	0.469197	100000	0.037	778.453	0.551149	1000	0.01	650.172	0.340848	100000	0.019	717.536	0.474716	100000	0.049	725.547	0.502919
24.0667	100000	0.017	777.331	0.500425	24.2	100000	0.014	720.418	0.462173	1000000	0.026	801.037	0.555975	100000	0.054	768.872	0.541488	100000	0.012	673.688	0.452616	100000	0.097	796.453	0.515567	10000	0.007	662.945	0.365854	100000	0.008	732.898	0.439997	100000	0.049	742.157	0.475741
23.25	100000	0.011	793.313	0.476456	24.3833	10000	0.034	734.986	0.434619	1000000	0.051	821.941	0.62364	1000000	0.027	787.804	0.538169	10000	0.08	689.713	0.455535	1000000	0.038	815.033	0.528163	10000	0.01	676.747	0.392359	10000	0.059	749.069	0.459676	100000	0.067	759.218	0.484995
23.7	100000	0.016	810.463	0.501587	23.1	100000	0.046	752.031	0.468857	1000000	0.056	842.007	0.551946	1000000	0.008	805.981	0.545416	100000	0.04	705.323	0.468389	100000	0.091	832.902	0.536199	10000	0.038	691.961	0.456508	100000	0.041	765.153	0.482639	100000	0.062	775.716	0.495038
25.1333	100000	0.072	829.243	0.517918	24.6333	100000	0.021	767.51	0.45461	10000000	0.019	863.701	0.637169	100000	0.031	824.544	0.52236	100000	0.014	720.418	0.424754	1000000	0.032	851.326	0.518419	100000	0.062	709.277	0.487245	100000	0.033	781.45	0.45856	100000	0.062	792.325	0.467372
22.6833	1000000	0.011	846.464	0.526234	22.85	100000	0.043	785.153	0.504314	1000000	0.034	884.472	0.593709	100000	0.053	841.928	0.527319	10000	0.026	734.599	0.43017	100000	0.034	868.023	0.506501	100000	0.048	725.517	0.492647	10000	0.115	796.538	0.457714	100000	0.023	807.504	0.46045
22.9833	100000	0.011	863.073	0.500925	24.3667	100000	0.043	801.763	0.482722	1000000	0.038	904.564	0.58393	1000000	0.021	860.524	0.528991	100000	0.024	751.093	0.469202	1000000	0.011	886.327	0.520672	100000	0.114	743.375	0.507986	1000000	0.008	812.624	0.457593	100000	0.036	824.76	0.490873
24.2333	100000	0.023	880.747	0.505524	23.2333	100000	0.023	817.47	0.475771	1000000	0.076	925.496	0.634027	100000	0.046	878.265	0.529285	10000	0.028	764.603	0.403063	1000000	0.015	906.706	0.607991	1000000	0.013	760.174	0.501188	10000	0.026	827.613	0.447159	100000	0.017	840.287	0.46324
23.8667	100000	0.055	898.614	0.518915	25.2	100000	0.017	833.643	0.470377					1000000	0.041	898.03	0.543668	100000	0.037	781.615	0.467922	100000	0.064	925.409	0.514435	100000	0.022	777.543	0.477739	100000	0.027	844.277	0.45836	100000	0.038	858.057	0.488782
23.8667	1000000	0.016	916.765	0.527127	23.6									1000000	0.017	916.692	0.5481	100000	0.024	797.6	0.469494	1000000	0.022	943.8	0.540156	100000	0.046	795.216	0.51909	100000	0.037	861.341	0.501187	100000	0.055	875.201	0.503503
23.9833	100000	0.065	935.397	0.538487	24.25									1000000	0.015	936.443	0.56455	100000	0.015	813.531	0.455378	1000000	0.016	963.272	0.55658	1000000	0.023	814.148	0.541128	1000000	0.016	880.063	0.535141	1000000	0.026	894.051	0.538815
22.7167	100000	0.094	952.539	0.523045	23.85									1000000	0.01	955.789	0.562266	10000	0.057	828.745	0.442153	100000	0.069	981.99	0.544002	1000000	0.012	833.141	0.551988	100000	0.083	899.048	0.551747	100000	0.069	912.069	0.523645
24.6667	1000000	0.041	971.273	0.526451	22.8833									100000	0.034	974.164	0.556593	100000	0.021	843.914	0.459478	1000000	0.014	999.62	0.534033	100000	0.038	851.414	0.553486	1000000	0.013	916.305	0.522722	100000	0.087	929.013	0.513244
23.5	100000	0.092	989.049	0.524304	23.8333									1000000	0.011	992.468	0.532324	100000	0.017	860.219	0.474194	100000	0.041	1017.78	0.528144	1000000	0.012	869.682	0.531308	100000	0.019	933.462	0.498982	1000000	0.018	946.672	0.513565
23.05	1000000	0.022	1006.92	0.5373
24.1	100000	0.1	1025.71	0.540542
