# Supplementary material for: Experimental evolution for the recovery of growth loss due to genome reduction
Source: eLife. 2024 May 1;13:RP93520. doi: 10.7554/eLife.93520 (PMC11062635; doi:10.7554/eLife.93520)
Supplement: Supplementary file 2. — The parameters acquired in the genome resequencing, which represent the goodness of the sequencing, are summarized. [file elife-93520-supp2.xlsx]

## Sheet: DNAseq statistics
Evos	paired read	Number of reads	total length (bp)	average length (bp)	mapped nucleotide (%)	mapped length (bp)	average coverage (bp)
A1	forword	4042784	606417600	150	99.7
	reverse	4041840	606276000	150	98.9
	total	8084624	1212693600	150	99.3	1199992739	327.513
A2	forword	5125059	768758850	150	99.6
	reverse	5124887	768733050	150	99.5
	total	10249946	1537491900	150	99.6	1525813698	416.44
B2	forword	6484980	972747000	150	99.6
	reverse	6484735	972710250	150	99.5
	total	12969715	1945457250	150	99.6	1930603929	526.919
C2	forword	5487751	823162650	150	99.6
	reverse	5487549	823132350	150	99.5
	total	10975300	1646295000	150	99.5	1633360619	445.792
D2	forword	5723232	858484800	150	99.6
	reverse	5722999	858449850	150	99.5
	total	11446231	1716934650	150	99.6	1703636829	464.973
E2	forword	4731921	709788150	150	99.6
	reverse	4731762	709764300	150	99.5
	total	9463683	1419552450	150	99.6	1408336330	384.377
F2	forword	4363209	654481350	150	99.7
	reverse	4363041	654456150	150	99.5
	total	8726250	1308937500	150	99.6	1298727414	354.461
G2	forword	5354244	803136600	150	99.6
	reverse	5354068	803110200	150	99.4
	total	10708312	1606246800	150	99.5	1593143361	434.816
H2	forword	4961235	744185250	150	99.7
	reverse	4961059	744158850	150	99.5
	total	9922294	1488344100	150	99.6	1476863667	403.08
