# Supplementary material for: Experimental evolution for the recovery of growth loss due to genome reduction
Source: eLife. 2024 May 1;13:RP93520. doi: 10.7554/eLife.93520 (PMC11062635; doi:10.7554/eLife.93520)
Supplement: Supplementary file 4. — The full names and abbreviations of the gene categories are shown. The number of mutated genes in each gene category is tallied for each Evos. [file elife-93520-supp4.xlsx]

## Sheet: Sheet1
Gene categories		A1	A2	B2	C2	D2	E2	F2	G2	H2
Pseudogenes in common	su								1
Transporter	t	1		1	1	2			2	2
Phage/IS in common	h	1		1	1	1	1	1	2
RNA	n					1
Cell process	cp	1
Enzyme	e		1	3	1	3		3	3	2
Enzyme, predicted	pe			3	1				1
Regulator, predicted	pr			1				1
Transporter, predicted	pt			1	1		1		1
Factor	f			2
Unknown function	o			1	1			1
Carrier	c				1			1		1
Regulator	r				2
Cell process	pc				1
