# Supplementary material for: Experimental evolution for the recovery of growth loss due to genome reduction
Source: eLife. 2024 May 1;13:RP93520. doi: 10.7554/eLife.93520 (PMC11062635; doi:10.7554/eLife.93520)
Supplement: Supplementary file 5. — The maximal peak (wavelength) acquired by the Fourier transform, the number of periods resulting from the curve fitting, the Fisher’s g test, and the p-values are summarized. [file elife-93520-supp5.xlsx]

## Sheet: Periodicity
	Max peak (Kb)	periods	Fisher-g	p-value
N0	774.3	6	0.09187	1.582e-158
N28	610.7	6	0.0875	2.372e-149
A1	610.7	6	0.1072	3.15e-135
A2	610.7	6	0.08189	1.461e-155
B2	610.7	6	0.1102	1.626e-124
C2	610.7	6	0.1129	6.212e-118
D2	610.7	6	0.08298	3.188e-136
E2	610.7	6	0.08212	8.841e-149
F2	610.7	6	0.09301	3.389e-130
G2	610.7	6	0.09296	3.201e-135
H2	610.7	6	0.08253	1.931e-143
