# Supplementary material for: Experimental evolution for the recovery of growth loss due to genome reduction
Source: eLife. 2024 May 1;13:RP93520. doi: 10.7554/eLife.93520 (PMC11062635; doi:10.7554/eLife.93520)
Supplement: Supplementary file 6. — A total of 108 DEGs are summarized. Gene ID, gene name, and gene function are indicated. [file elife-93520-supp6.xlsx]

## Sheet: DEGs_108
gene_id	gene_name	description
BAA14869	puuC	gamma-Glu-gamma-aminobutyraldehyde dehydrogenase, NAD(P)H-dependent
BAA14789	yciE	conserved hypothetical protein
BAE76442	ydcY	hypothetical protein
BAA15851	hisD	bifunctional histidinal dehydrogenase and histidinol dehydrogenase
BAA16198	yfcZ	conserved hypothetical protein
BAA16502	smpA	small membrane lipoprotein
BAE77319	hupA	HU, DNA-binding transcriptional regulator, alpha subunit
BAA15227	ydeJ	conserved hypothetical protein
BAA14868	puuR	DNA-binding transcriptional repressor
BAE78363	prfC	peptide chain release factor RF-3
BAA16459	glyA	serine hydroxymethyltransferase
BAE77334	rplL	50S ribosomal subunit protein L7/L12
BAA14871	puuE	GABA aminotransferase, PLP-dependent
BAE76483	blr	beta-lactam resistance membrane protein
BAE76749	rpoE	RNA polymerase, sigma 24 (sigma E) factor
BAE77324	rsd	stationary phase protein, binds sigma 70 RNA polymerase subunit
BAE76975	zapA	protein that localizes to the cytokinetic ring
BAE76499	ydhZ	hypothetical protein
BAA77865	yaeP	conserved hypothetical protein
BAA36016	hlyE	hemolysin E
BAE76540	yobH	hypothetical protein
BAE76446	yncG	hypothetical protein
BAE76365	bioD	dethiobiotin synthetase
BAE77393	sbp	sulfate transporter subunit
BAA16273	xapR	DNA-binding transcriptional activator
BAA14791	yciG	hypothetical protein
BAA36053	ymgE	predicted inner membrane protein
BAE76403	ynaJ	predicted inner membrane protein
BAA15972	thiM	hydoxyethylthiazole kinase
BAE76633	lysP	lysine transporter
BAE78365	ytjA	hypothetical protein
BAE77387	yiiT	stress-induced protein
BAA15857	hisF	imidazole glycerol phosphate synthase, catalytic subunit with HisF
BAE77552	atpF	F0 sector of membrane-bound ATP synthase, subunit b
BAA14870	puuB	gamma-Glu-putrescine oxidase,FAD/NAD(P)-binding
BAA15634	cspC	stress protein, member of the CspA-family
BAA15128	osmC	osmotically inducible, stress-inducible membrane protein
BAA35675	ompF	outer membrane porin 1a (Ia;b;F)
BAE77096	ygiE	zinc transporter
BAA14837	osmB	lipoprotein
BAE77488	yigB	predicted hydrolase
BAA16274	xapB	xanthosine transporter
BAE77984	rpsN	30S ribosomal subunit protein S14
BAA14858	puuD	gamma-Glu-GABA hydrolase
BAA14856	puuP	putrescine importer
BAE76233	ybaY	predicted outer membrane lipoprotein
BAE77340	tufB	protein chain elongation factor EF-Tu
BAA15092	ydcE	4-oxalocrotonate tautomerase
BAA15458	ynhG	conserved hypothetical protein
BAA15528	osmE	DNA-binding transcriptional regulator
BAA35927	ycfR	hypothetical protein
BAE76360	ybhB	predicted kinase inhibitor
BAA15622	yoaD	predicted phosphodiesterase
BAB96636	thiP	fused subunits of thiamin transporter and membrane components of ABC superfamily
BAE78245	pyrL	pyrBI operon leader peptide
BAE76196	nusB	transcription antitermination protein
BAE76395	trpL	trp operon leader peptide
BAA35830	csgD	DNA-binding transcriptional activator in two-component regulatory system
BAE76485	ydgK	conserved inner membrane protein
BAA15858	hisI	fused phosphoribosyl-AMP cyclohydrolase and phosphoribosyl-ATP pyrophosphatase
BAE77888	pck	phosphoenolpyruvate carboxykinase
BAA15852	hisC	histidinol-phosphate aminotransferase
BAA15684	cutC	copper homeostasis protein
BAA16279	yfeN	conserved outer membrane protein
BAA15560	ydjE	predicted transporter
BAA35395	sucD	succinyl-CoA synthetase, NAD(P)-binding, alpha subunit
BAE76541	yebV	hypothetical protein
BAE78218	ytfK	conserved hypothetical protein
BAE77740	yiaG	predicted transcriptional regulator
BAE76363	bioF	8-amino-7-oxononanoate synthase
BAE76748	rseA	anti-sigma factor
BAA15118	narU	nitrate/nitrite transporter
BAE77512	rffE	UDP-N-acetyl glucosamine-2-epimerase
BAE77327	thiF	thiamin (thiazole moiety) biosynthesis protein
BAA16549	luxS	S-ribosylhomocysteinase
BAE76590	yehE	hypothetical protein
BAE76988	mscS	mechanosensitive channel
BAE76646	yejG	hypothetical protein
BAE76537	yobF	hypothetical protein
BAE77282	yhcO	predicted barnase inhibitor
BAA14857	puuA	gamma-Glu-putrescine synthase
BAA15807	erfK	conserved hypothetical protein with NAD(P)-binding Rossmann-fold domain
BAE76531	yeaQ	conserved inner membrane protein
BAE77970	rpsJ	30S ribosomal subunit protein S10
BAA15579	mipA	scaffolding protein for murein synthesizing machinery
BAE77345	btuB	vitamin B12/cobalamin outer membrane transporter
BAE76619	yohK	predicted inner membrane protein
BAE76496	ydhS	conserved hypothetical protein withFAD/NAD(P)-binding domain
BAE77800	yhiO	predicted universal stress (ethanol tolerance) protein B
BAE77150	yqjK	conserved hypothetical protein
BAE78151	ecnB	entericidin B membrane lipoprotein
BAA15850	hisG	ATP phosphoribosyltransferase
BAE77326	thiE	thiamin phosphate synthase
BAA35857	yceP	hypothetical protein
BAE76191	tsx	nucleoside channel, receptor of phage T6 and colicin K
BAA36043	ycgB	conserved hypothetical protein
BAA35599	cspD	cold shock protein homolog
BAE77219	secG	preprotein translocase membrane subunit
BAE78214	cpdB	2':3'-cyclic-nucleotide 2'-phosphodiesterase
BAE76452	sra	30S ribosomal subunit protein S22
BAE76364	bioC	predicted methltransferase, enzyme of biotin synthesis
BAA16405	ndk	multifunctional nucleoside diphosphate kinase, apyrimidinic endonuclease, and 3'-phosphodiesterase
BAA16044	lpp	murein lipoprotein
BAE78266	yjgB	predicted alcohol dehydrogenase, Zn-dependent and NAD(P)-binding
BAA15480	ihfA	integration host factor (IHF), DNA-binding protein, alpha subunit
BAA15345	ydgC	conserved inner membrane protein associated with alginate biosynthesis
BAA16262	mntH	manganese/divalent cation transporter
BAE76535	yoaH	conserved hypothetical protein
