# Supplementary material for: Experimental evolution for the recovery of growth loss due to genome reduction
Source: eLife. 2024 May 1;13:RP93520. doi: 10.7554/eLife.93520 (PMC11062635; doi:10.7554/eLife.93520)
Supplement: Supplementary file 7. — Gene expression levels are shown in the logarithmic value of FKPM. Gene ID, gene name, strain name, and nine evolutionary lineages are indicated. N0 and N28 represent the wild-type and reduced genomes, respectively. [file elife-93520-supp7.xlsx]

## Sheet: Normalized
gene_id	gene_name	N0	N28	A1	A2	B2	C2	D2	E2	F2	G2	H2
BAA15550	gdhA	2.39359	1.12267	1.40142	1.77431	1.23585	1.35353	1.24814	3.48874	1.15871	1.30917	1.7228
BAA15156	gadC	1.50749	3.57259	2.91502	3.55822	2.60525	2.13668	3.00605	1.81576	2.2783	1.88468	3.39456
BAA15163	gadB	1.18039	3.38377	2.68926	3.33825	2.41933	1.91451	2.79056	1.58993	2.06811	1.5167	3.10305
BAA15841	yeeE	1.73272	0.892575	0.960926	1.48548	0.753566	0.683301	0.98901	3.04386	0.828262	0.872834	1.43587
BAE77785	hdeB	2.20539	3.73641	3.72993	3.73195	3.07758	2.53772	3.21454	2.55666	2.72632	2.11533	3.64984
BAE77783	hdeD	1.87419	3.54194	3.45159	3.66352	2.93951	2.50545	3.24135	2.35795	2.72689	2.1539	3.52659
BAE77788	slp	1.85632	3.33429	3.42611	3.29971	2.90453	2.708	2.98678	2.27909	2.55791	2.03516	3.13289
BAE77778	gadX	2.03054	3.1294	2.96017	3.11198	2.97492	2.72253	2.94323	2.33102	2.62814	2.39161	3.00503
BAA14869	puuC	0.988631	2.57257	0.889015	1.77959	1.72946	1.31499	1.49849	1.27789	1.36983	1.38607	1.80319
BAA15840	yeeD	1.78356	1.38626	1.27937	1.59996	0.927889	1.05887	1.0528	3.09803	1.23835	1.08557	1.46929
BAE77784	hdeA	2.95422	4.25413	4.23075	4.16049	3.58106	3.09897	3.74497	3.051	3.22711	2.80353	4.11877
BAA16546	mprA	3.01615	3.74571	3.66558	3.60654	3.71031	3.75191	3.70327	2.4554	3.6895	3.72307	3.47222
BAE77780	mdtF	1.0138	2.33794	2.04393	2.44526	1.7741	1.24292	1.86907	1.09075	1.30745	0.916247	2.22893
BAA16240	evgA	2.30684	2.58665	2.72037	2.63071	2.41842	2.44338	2.53902	1.61038	2.6219	2.46106	2.59096
BAA15128	osmC	3.24326	4.08792	3.56166	3.4103	3.27126	3.56262	3.54961	3.06376	3.29337	3.68086	3.6511
BAA15998	ompC	4.16473	4.37039	4.29139	4.34092	4.39524	4.20732	4.30892	3.64357	4.17211	4.27904	4.35614
BAA35484	dps	3.14975	3.94451	2.99021	3.77137	3.2083	3.28589	3.50474	3.32368	3.17905	2.91503	3.78877
BAA14857	puuA	1.66507	3.18916	1.75879	2.34007	2.39315	2.16112	2.18302	1.99516	2.19766	2.15166	2.34554
BAE76810	mutS	1.85782	1.17351	1.29902	1.57859	1.36177	1.19953	1.30222	1.95841	1.27813	1.33961	1.48552
BAE76265	ybaT	1.00328	2.20221	1.92247	2.08505	1.5697	1.44001	1.86935	1.23185	1.44553	0.924397	2.10918
BAE77781	mdtE	0.854706	2.49295	2.14866	2.63411	1.89381	1.39268	2.01754	1.11265	1.39415	0.738079	2.37728
BAE77779	gadW	2.4829	2.47688	2.1372	2.5297	2.33479	1.98726	2.3106	1.65408	1.92176	1.74853	2.41655
BAA15126	adhP	2.19434	2.62551	1.98199	2.58979	2.19192	2.31247	2.43916	2.23814	1.95924	2.19544	2.47519
BAE77123	ygjG	2.19372	2.87272	2.23331	2.84783	2.43573	2.28398	2.22962	2.44853	2.35182	2.37094	2.75962
BAE77782	gadE	1.44495	3.38658	2.82959	3.32294	2.63122	2.07785	2.73543	1.76037	2.01146	1.48851	3.0572
BAE76258	fsr	1.22902	0.863179	1.22023	0.962345	0.957926	1.05517	0.830963	1.79663	0.99852	0.973806	1.03674
BAE76248	apt	2.82677	2.03688	2.11968	2.17033	2.09566	2.14283	2.10974	2.61344	2.38234	2.28627	2.19764
BAA36016	hlyE	0.685199	2.42169	1.43087	1.41435	2.03649	2.04549	2.09419	0.894674	1.91679	1.67887	1.41755
BAE77777	gadA	0.906209	2.97724	2.34138	2.79693	1.66535	1.08583	2.08288	1.03203	1.17914	0.71179	2.54604
BAA36043	ycgB	1.90647	2.39509	1.8447	2.25757	1.98952	2.02776	2.20289	2.07817	1.91427	1.87305	2.26342
BAE78266	yjgB	1.93563	2.22385	1.52732	1.96375	1.79956	1.58867	1.80917	1.73022	1.62648	1.68231	1.97105
BAE77771	yhjE	2.91583	2.45078	3.08789	2.44358	2.72342	2.61545	2.49458	2.86286	2.72698	2.75092	2.4814
BAE77393	sbp	1.89127	1.46512	1.92334	1.98769	2.57554	2.76047	2.48885	1.83643	1.98821	2.15382	1.73676
BAE77062	yghA	1.77902	2.27429	1.62552	2.20886	1.92062	1.7764	2.00483	1.85206	1.75313	1.93246	2.1528
BAA35629	ycaC	2.67265	3.04307	2.15809	2.92712	2.59472	2.76064	2.79211	2.51722	2.39993	2.6775	2.83709
BAA36033	nhaB	2.13199	1.75957	1.915	1.91888	1.75954	1.87494	1.7898	2.27156	1.96466	1.90436	1.92853
BAA16547	emrA	1.98501	2.78905	2.77245	2.73243	2.94883	2.85693	2.84111	1.67013	2.78038	2.95052	2.6472
BAA14856	puuP	1.12715	2.37376	1.16713	1.59909	1.57	1.36236	1.40639	1.2776	1.42331	1.47325	1.68605
BAA14870	puuB	0.645055	2.24818	0.690864	1.4442	1.3872	1.05537	1.13439	0.990075	1.07221	0.939863	1.4451
BAE76837	ygcL	0.489529	2.08092	1.96782	1.54374	2.2655	2.03076	2.1586	0.557709	2.07035	1.96221	1.52263
BAE76496	ydhS	1.62309	2.01366	1.6085	1.89494	1.73958	1.73666	1.90094	1.84712	1.60311	1.56463	1.85804
BAE76627	mglB	1.79251	1.51799	2.14498	1.70146	2.19289	2.16499	2.13717	2.19815	1.8819	2.00197	1.62637
BAE76633	lysP	2.75443	2.08241	2.6008	2.25999	2.66297	2.58314	2.63195	2.37494	2.42436	2.76501	2.24818
BAA35850	msyB	2.85352	3.07467	3.11744	3.25529	2.93949	3.26799	3.15657	3.04511	2.99134	3.01716	3.09727
BAE76499	ydhZ	2.27853	2.48281	1.70243	1.56605	1.65907	1.58769	1.60292	1.1208	1.83718	1.72922	1.71855
BAA14837	osmB	2.86539	3.42765	2.69608	2.90465	2.47049	2.63172	2.76904	2.15194	2.69392	2.77626	2.90991
BAE78254	yjgN	0.710608	1.83649	1.43539	1.29549	1.83293	1.58157	1.70634	0.47779	1.71934	1.53397	1.34618
BAA15458	ynhG	2.09044	2.45806	2.09381	2.31829	2.07834	2.2095	2.23698	2.13853	1.99165	2.00797	2.25272
BAE78364	osmY	2.86356	3.28703	2.87189	3.36847	3.23585	3.29429	3.29567	3.11119	2.99458	3.16095	3.31723
BAA16241	evgS	1.52128	1.71528	2.02144	1.79344	1.57851	1.70125	1.7291	0.964057	1.82518	1.5244	1.71858
BAE76748	rseA	2.76436	3.12996	2.74086	3.00493	2.97945	2.87701	3.01408	2.74406	2.98619	2.87122	3.02517
BAA15166	yddB	0.745334	0.515347	0.399927	0.455334	0.288463	0.531632	0.34595	1.67146	0.396109	0.555272	0.130557
BAA14789	yciE	1.65803	2.40675	1.70193	2.10835	1.98129	1.89524	2.19998	1.86996	1.90271	2.09398	1.98455
BAE77888	pck	2.35154	2.09618	2.91334	2.50399	2.39217	2.50928	2.59008	2.61765	2.50187	2.25004	2.36449
BAA35585	poxB	2.03254	2.4847	2.22923	2.64253	2.34153	2.48918	2.52458	2.38543	2.1546	2.08597	2.59276
BAA35830	csgD	1.44877	2.13335	0.762856	1.57469	1.44805	1.23843	1.70543	1.60837	1.76061	1.60869	1.93291
BAE78365	ytjA	2.60798	2.80899	1.8996	2.09561	2.10018	1.87971	2.12517	2.02774	2.04295	2.06175	2.29443
BAE76835	ygcJ	0.897936	2.17343	2.08427	1.672	2.3031	2.13055	2.24914	1.04952	2.15777	2.0039	1.60173					BAE77520
BAA16339	talA	2.33992	2.801	2.27741	2.76853	2.50498	2.51737	2.6452	2.51365	2.28226	2.23578	2.71753
BAA15513	katE	2.06738	2.68556	2.33166	2.87313	2.47254	2.59135	2.67662	2.5369	2.2826	2.40756	2.78552
BAE76452	sra	3.65796	3.8913	2.29638	2.87263	2.37821	2.46257	2.63404	2.53091	2.47465	2.51599	3.00498
BAA15349	fumC	1.58205	1.34735	1.73749	1.61595	1.75639	1.64177	1.72323	2.36015	1.61082	1.84332	1.68218
BAE77699	yibA	0.989838	1.91143	1.62728	1.57893	1.8508	1.77423	1.82678	1.14806	1.73441	1.68717	1.52962
BAB96592	nhaA	2.01051	2.34053	2.14212	2.20074	2.08499	1.86482	2.12726	1.9083	1.85688	1.94519	2.21715
BAE77387	yiiT	2.34225	2.64718	2.26996	2.35357	2.35896	2.14217	2.39241	2.12841	2.37496	2.40185	2.36553
BAA15428	cfa	2.73568	3.11982	2.77782	3.1682	2.76095	2.78552	2.96565	2.83242	2.68998	2.63437	3.10104
BAA14790	yciF	1.31878	2.24672	1.63615	2.23601	1.98717	1.97782	2.25101	1.93172	1.79616	2.03426	2.02721
BAA15580	yeaG	1.98794	2.60009	2.33686	2.73594	2.47892	2.50354	2.64202	2.47529	2.26036	2.39187	2.65856
BAE76534	yoaC	2.29606	2.54742	2.10981	2.55171	2.24771	2.28175	2.42193	2.31759	2.14447	2.26463	2.47953
BAA35435	ybhJ	0.855882	1.54517	1.36918	1.27154	1.45457	1.61219	1.46968	0.529285	1.63128	1.61658	1.29401
BAE77388	yiiS	2.47428	2.76148	2.52702	2.67416	2.69335	2.48071	2.67686	2.40167	2.7006	2.66461	2.63922
BAE76191	tsx	2.92456	2.65361	2.87295	3.10459	3.0109	3.09658	2.93352	3.24969	2.95068	3.02453	3.01936
BAA14868	puuR	1.53649	2.4912	1.77553	1.99612	1.97365	1.91311	1.94213	1.86929	1.88594	1.8533	2.01812
BAE76541	yebV	2.82602	3.16241	1.86269	2.37837	1.82591	1.74954	2.12625	2.15725	2.00436	1.65681	2.27787
BAA14858	puuD	1.01601	2.51909	0.98697	1.57617	1.60676	1.27692	1.43152	1.31565	1.3259	1.28304	1.61206
BAE77251	yrbL	3.13958	3.53904	3.35857	3.70674	2.93119	3.30355	3.40166	3.33292	3.17252	3.06507	3.57513
BAE77480	pldA	2.22443	1.69244	1.87753	1.93746	1.81154	1.91464	1.84671	2.21227	1.85887	1.92483	1.94776
BAE77759	bcsE	1.92199	2.26404	2.47238	2.31757	2.30603	2.28228	2.27164	2.08402	2.31665	2.25913	2.3238
BAE76537	yobF	2.99648	3.23988	1.97459	2.84651	2.71521	2.55381	2.81391	2.18227	1.8806	2.47788	2.83521
BAE77770	yhjG	1.58078	1.89208	1.87982	2.00721	1.84718	1.73844	1.93425	1.78422	1.51354	1.56442	1.93989
BAA14871	puuE	0.715011	2.09921	0.629702	1.33183	1.3433	1.15348	1.05448	0.964428	1.09717	0.937684	1.42117
BAE77152	yqjG	1.86453	2.02475	1.71865	2.00181	1.86358	1.77381	1.96288	1.78336	1.64231	1.68822	1.95665
BAA15164	pqqL	0.947057	0.798059	0.784527	0.824607	0.65314	0.837131	0.764838	1.65806	0.670705	1.00023	0.700072
BAE76988	mscS	2.66323	3.18062	2.53079	3.07596	2.84824	2.78872	2.97554	2.86228	2.6268	3.02873	2.99611
BAE76489	sodC	2.16765	2.65062	2.12234	2.4797	2.25365	2.23485	2.46462	2.23511	2.13532	2.25502	2.43007
BAE76836	ygcK	0.488223	2.12629	2.15836	1.6896	2.37715	2.17566	2.28332	0.846361	2.19532	2.04146	1.66092
BAA14945	ydaM	1.90185	2.20557	2.10061	2.26512	2.01557	2.27747	2.19031	2.21726	2.05256	1.70685	2.18528
BAA15528	osmE	3.25466	2.96979	2.17181	2.2498	2.20172	2.21822	2.24458	2.27023	2.2092	2.24891	2.25978
BAA15221	marA	1.50285	1.08907	1.23726	1.79419	1.21209	1.26181	1.21366	2.12445	1.21944	1.26715	1.61148
BAA14791	yciG	1.80955	2.51252	0.892133	1.63347	1.5372	1.3315	1.72063	1.46664	1.38772	1.5484	1.59767
BAE77149	yqjE	2.55836	2.63767	2.2811	2.41864	2.29167	2.20986	2.35757	2.33515	2.14149	2.20699	2.47185
BAA16340	tktB	2.26045	2.75398	2.31091	2.83524	2.55741	2.50621	2.71486	2.55025	2.32197	2.34695	2.78963
BAA35449	ybhP	1.61116	1.95021	1.53663	1.79678	1.69734	1.87381	1.87927	1.76494	1.69177	1.44389	1.78659
BAE78016	aceB	3.21982	3.91813	3.94544	3.73395	3.9261	3.86397	3.78331	3.5305	3.69131	3.78832	3.79781
BAE76363	bioF	2.05003	2.54821	2.16149	2.04247	2.33862	2.20531	2.03453	2.10371	2.2801	2.39697	2.06271
BAE76233	ybaY	2.57955	2.77855	1.89481	2.43779	2.17426	2.10746	2.28921	2.27516	2.0167	2.08204	2.46926
BAE77757	bcsG	1.82259	2.02438	2.29031	2.12902	2.12167	2.07335	2.07668	1.87563	2.13296	2.08083	2.10923
BAA15227	ydeJ	1.35203	1.95416	1.22213	1.73818	1.43298	1.27991	1.6321	1.51732	1.44167	1.46267	1.65033
BAA35415	ybgS	2.17222	2.60846	1.52121	2.38651	1.84974	1.84807	2.2013	2.01803	1.60325	1.92837	2.36578
BAE77747	yhjY	1.98324	2.28145	2.18621	2.24562	2.10323	2.07889	2.12429	1.99995	1.85462	1.97347	2.1761
BAE78020	iclR	2.40305	1.97411	2.09213	2.06476	1.9903	1.9129	1.94175	2.46444	2.07164	2.00809	2.05781
BAE77301	dusB	2.87974	2.49113	2.71643	2.6535	2.82391	2.63893	2.63486	2.83012	2.65959	2.72772	2.54411
BAE77302	fis	2.95749	2.42105	2.58914	2.51308	2.68094	2.51321	2.47632	2.70958	2.62572	2.69112	2.44402
BAA36055	dhaH	1.9227	1.36044	1.51224	1.7562	0.914392	1.3977	1.27456	2.13614	1.35187	1.22502	1.74908
BAA35675	ompF	3.99028	3.76846	4.38226	2.79867	4.12437	4.31999	4.04836	4.4152	4.29513	4.04343	3.52872
BAE76459	tam	1.87832	2.23102	1.98865	2.17909	1.97046	2.11987	2.15077	2.00671	1.91973	1.76404	2.06138
BAE77840	ugpB	1.76761	2.22611	1.99399	2.23966	2.15191	2.22521	2.29922	2.01722	1.8072	2.1587	2.12876
BAE77282	yhcO	2.26955	2.3823	1.92814	2.20802	2.08069	1.88621	2.13321	2.00164	1.75827	1.79198	2.17887
BAA15500	pfkB	1.9856	2.85752	2.59174	2.87517	2.73123	2.82772	2.77632	2.73547	2.69258	2.73355	2.80753
BAA15167	yddA	0.365623	-0.377634	-0.838709	-0.382482	-0.617125	-0.437692	-0.913218	1.20099	-0.767075	-0.125771	-0.652068
BAA16076	yfbE	1.45616	1.94934	1.6365	1.98892	1.6276	1.64033	1.89523	1.71016	1.52858	1.72053	1.91915
BAA35927	ycfR	1.83712	3.09053	2.57964	2.20634	2.42747	2.4817	2.49832	1.8175	2.78514	2.57258	2.38316
BAE76167	proC	2.37598	1.34978	1.50385	1.89697	1.34017	1.42335	1.48616	2.06106	1.48894	1.38386	1.87252
BAE76749	rpoE	2.86783	3.15066	2.67886	2.95165	2.96459	2.81102	2.98192	2.7282	2.91361	2.81179	3.00563
BAE76264	ybaS	0.776893	2.24084	2.19211	2.39556	1.88183	1.71883	2.1962	1.34293	1.67562	0.929833	2.28836
BAE76531	yeaQ	3.56907	3.58131	2.8901	2.96686	2.77206	2.74721	2.92408	2.96076	2.86889	2.75463	3.06652
BAA15118	narU	0.78653	1.49008	0.521476	0.97821	0.750543	0.888436	1.05727	0.654995	0.993171	1.06196	1.15055
BAA15733	uvrC	2.01316	0.633857	0.646175	0.873379	0.712767	0.651823	0.800208	0.931816	0.637026	1.04574	0.76181
BAE76509	ydiZ	2.22018	2.73253	2.64246	3.00264	2.74959	2.88438	2.85055	2.80051	2.57449	2.56205	2.88165
BAE77786	yhiD	0.947732	2.09817	2.03859	2.19833	1.56441	0.869364	1.78007	0.994187	1.09425	0.640727	2.11139
BAA16446	yphA	2.21583	2.30514	1.88066	2.21588	2.1058	2.04687	2.18757	1.97203	1.82007	1.79054	2.12946
BAE78153	blc	2.05627	2.20969	2.09135	2.18424	2.12361	1.86595	2.12091	2.03708	1.93076	1.86231	2.18393
BAE76446	yncG	1.42097	1.74746	1.40971	1.43974	1.22852	1.29077	1.31194	1.43732	1.11456	1.10272	1.49115
BAE76505	ydiV	1.96171	2.11747	2.16723	2.11499	2.13662	2.21124	2.12764	1.66369	2.12398	2.00446	2.10597
BAA16205	fadL	2.36943	2.07318	2.46219	2.417	2.22019	2.40555	2.37594	2.37517	2.68572	2.41544	2.1804
BAE77739	cspA	3.1044	2.57813	3.46029	2.68493	2.84528	2.48945	2.52263	3.21018	3.0541	2.48385	2.45391
BAE76591	mrp	2.69202	2.29818	2.56021	2.56567	2.33291	2.40952	2.45179	2.7474	2.53423	2.55408	2.57711
BAA15082	yncC	1.56204	1.73624	1.38377	1.63721	1.56174	1.56476	1.58721	1.52904	1.37228	1.449	1.50586
BAA35711	rmf	3.42467	3.86206	3.15749	3.55682	3.0315	3.1735	3.23887	3.46976	3.28952	3.47175	3.78188
BAE77147	yqjC	2.80101	2.88093	2.833	2.9901	2.90612	2.9719	2.91867	2.86473	2.65334	2.59198	2.94121
BAA16548	emrB	1.53665	2.20352	2.23267	2.13765	2.3869	2.16762	2.27388	1.15503	2.19436	2.4402	2.12802
BAE77219	secG	3.6984	3.15425	3.44802	3.36484	3.54885	3.37347	3.42044	3.58148	3.36381	3.41985	3.34409
BAA35712	fabA	3.33637	3.07257	3.41345	3.19123	2.93482	3.45264	3.1949	3.29877	3.59533	3.3323	3.13907
BAA15174	ydeP	0.839497	1.64065	1.60798	1.39597	1.3336	1.55767	1.43867	0.885998	1.53533	1.5085	1.32096
BAE76501	ydiH	2.26475	2.9151	2.27073	2.83204	2.26393	2.56395	2.53013	2.50507	2.39766	2.43416	2.81833
BAA35552	grxA	2.20837	2.94945	2.46593	2.79044	2.51829	2.60514	2.67242	2.63496	2.43039	2.40519	2.75437
BAA15622	yoaD	1.00101	1.3925	0.909579	1.20265	0.843414	0.937339	1.13939	0.915074	0.797326	0.797734	1.13458
BAE76266	cueR	2.28375	2.66505	2.56316	2.67836	2.43626	2.51716	2.54716	2.45634	2.50981	2.35573	2.67192
BAA16078	yfbG	1.29602	1.67592	1.44063	1.70209	1.38069	1.41401	1.64533	1.54849	1.35503	1.45288	1.69178
BAA15022	ydbD	0.528129	1.18035	0.97335	0.73767	0.913912	1.05063	1.06405	0.678524	1.04312	1.18968	0.74783
BAA36053	ymgE	1.96518	2.22686	1.55108	1.53935	1.07729	1.37713	1.55877	1.52569	1.49789	1.49119	1.76059
BAE77775	treF	1.67421	2.01478	1.87229	1.95494	1.8097	1.66168	1.86267	1.79464	1.67722	1.76238	1.93914
BAA15993	mqo	1.22955	1.70473	1.84746	1.80682	1.64855	1.54329	1.74922	1.24199	1.67476	1.85789	1.85913
BAA15155	yddV	1.66786	1.91261	1.56385	1.90833	1.69565	1.98005	1.87594	1.6961	1.50908	1.61609	1.79207
BAA15226	ydeI	1.5308	2.18295	1.45835	2.00515	1.67497	1.54856	2.01561	1.86497	1.76199	1.96334	1.95381
BAE78168	yjeF	1.80621	2.16444	2.05981	2.26235	2.137	2.19134	2.21241	2.0688	1.93158	1.92953	2.22136
BAE76268	ybbK	1.90146	2.23258	2.29617	2.26291	2.20858	2.4259	2.25633	1.97235	2.28843	2.26921	2.23045
BAE77800	yhiO	2.33394	2.58704	2.13454	2.2758	2.18724	1.89782	2.17622	2.14689	1.97031	1.90404	2.37281
BAE77740	yiaG	3.07609	3.23867	2.65024	2.85004	2.75389	2.50609	2.73527	2.79948	2.4543	2.60159	2.79924
BAA15653	yebF	2.99358	3.02021	2.74204	2.84594	2.74826	2.67586	2.84862	2.80116	2.60343	2.57621	2.74588
BAA16123	nuoA	3.11597	2.95712	3.34492	3.04791	3.01577	3.09767	3.14287	3.28129	3.07651	3.07545	2.9976
BAA15585	yeaH	1.45312	2.00045	1.64419	2.02028	1.72615	1.73695	1.90301	1.79758	1.60568	1.60948	2.01629
BAE77314	purD	2.61661	2.42973	2.974	2.661	2.81376	2.68421	2.69949	2.76703	2.73931	2.82321	2.58537
BAA15560	ydjE	0.770303	1.34097	0.951717	0.486066	1.04685	0.836338	1.018	0.449528	1.1018	1.1186	0.532206
BAE77447	yihF	0.663256	1.29589	1.2241	1.26785	1.38753	1.08615	1.30942	0.822666	1.38739	1.3853	1.23312
BAA35266	cspE	4.03362	3.42037	3.25825	2.65456	2.66554	2.55929	2.68884	3.12071	3.32854	2.92554	2.82011
BAE77705	aldB	1.06074	1.53659	1.83673	1.81477	1.38006	1.68221	1.73103	1.60145	1.36068	1.30938	1.80138
BAE76362	bioB	2.30254	2.78654	2.64599	2.62996	2.84328	2.81944	2.57185	2.61628	2.73041	2.84608	2.4846
BAE77254	arcB	1.79467	1.48276	1.60756	1.75827	1.59427	1.51868	1.62264	2.03189	1.5412	1.55601	1.737
BAA35715	ompA	4.25318	4.0335	4.28697	4.16164	4.18844	4.12837	4.06749	4.34827	4.13531	4.25634	4.10589
BAE77376	cytR	2.08772	1.86988	2.30019	2.10127	2.08322	2.13624	2.17227	2.28801	2.2842	2.10393	1.99525
BAA16465	yfiD	3.17676	3.03216	2.27484	2.87392	2.16852	2.56866	2.77689	2.47762	3.45519	2.67809	3.10702
BAA16405	ndk	3.1136	2.6436	3.24349	3.16482	3.12457	3.23913	3.13134	3.36888	3.03271	3.17276	2.99177
BAA15478	btuE	2.37089	2.50487	2.35871	2.58495	2.47384	2.60557	2.53013	2.51845	2.34727	2.33262	2.47701
BAB96738	degP	2.47255	2.76337	2.41555	2.74341	2.83281	2.7249	2.78997	2.43473	2.89576	2.92062	2.71297
BAE77050	yghU	2.48479	2.7092	2.60264	2.77153	2.59628	2.54697	2.6379	2.60031	2.51608	2.52079	2.69294
BAE77150	yqjK	2.50859	2.51383	1.72776	1.76212	1.53046	1.50079	1.66673	1.64103	1.6269	1.5967	1.8911
BAE78018	aceK	2.43544	3.02564	3.06527	2.63739	2.86533	2.72694	2.75152	2.51453	2.68144	2.74173	2.75262
BAE77674	htrL	2.33103	2.58993	2.64236	2.41581	2.71727	2.65205	2.6726	2.2711	2.75089	2.84981	2.40956
BAA14960	trkG	1.51044	1.06504	0.979965	1.05572	0.781098	1.09545	0.796051	1.67247	0.998612	1.14974	1.0301
BAA15663	lpxM	2.08347	1.85329	1.72747	1.8791	1.80233	1.81256	1.82908	2.3591	2.00418	1.81695	1.77951
BAA15798	yodB	1.53931	1.68295	1.47898	1.4102	0.954577	1.26402	1.34881	1.17208	1.21611	1.32237	1.32243
BAE77193	yraM	2.26171	2.02953	2.15577	2.24879	2.2345	2.14486	2.14682	2.30929	2.12744	2.17125	2.1884
BAA36057	dhaK	1.92805	1.23746	1.67772	1.92106	0.894393	1.50174	1.27729	2.28353	1.26238	1.09388	1.91811
BAE78137	yjdC	2.47673	2.74478	2.62454	2.73571	2.7114	2.58989	2.69038	2.60229	2.50977	2.58869	2.68107
BAA15611	yeaZ	2.05072	1.4526	1.76599	1.74217	1.70606	1.7125	1.67395	2.12118	1.72706	1.76157	1.77821
BAE78059	yjbR	2.04109	2.42276	2.20485	2.36625	2.16102	2.04239	2.17226	2.10778	2.06685	2.04764	2.36318
BAA16247	frc	0.635011	1.43013	1.30743	1.61948	1.18045	1.26897	1.2523	0.63442	1.02161	1.16469	1.41351
BAA15220	marR	1.40628	1.08216	0.910769	1.73953	0.899909	1.22335	1.17786	2.02259	1.04757	1.10083	1.52504
BAE77628	ade	1.28848	1.83771	1.81414	1.68356	2.09211	2.00046	1.98636	1.38171	1.96894	2.10834	1.55196
BAA15807	erfK	1.99386	2.22497	1.79559	1.98184	1.79851	1.8409	1.93075	1.84307	1.82843	1.67334	1.94855
BAE76986	yggE	2.64611	2.77029	2.5586	2.70504	2.78103	2.6994	2.73535	2.59169	2.60284	2.69115	2.65347
BAE77069	dkgA	1.68312	2.09568	1.9943	2.17521	2.01608	1.97345	2.16694	1.95375	1.84442	1.86759	2.1952
BAE78237	nrdD	1.30136	1.90315	1.98287	1.76065	1.52471	1.85497	1.78955	1.6219	2.00747	1.83699	1.8252
BAA15370	hdhA	2.61658	2.45714	2.11644	2.48546	2.25795	2.32887	2.39105	2.34359	2.24489	2.46952	2.40549
BAE76224	ybaX	1.83305	1.24697	1.44809	1.67153	1.35	1.33368	1.36674	2.02638	1.5233	1.65815	1.67803
BAA36056	dhaL	1.80034	1.28127	1.49011	1.70058	0.937767	1.36985	1.17707	2.03025	1.2555	1.04098	1.69339
BAE76833	ygcH	0.960695	1.85591	1.91162	1.52447	2.06682	1.92697	2.01997	1.18357	1.8726	1.82241	1.58589
BAA15896	galF	3.12528	3.14813	3.09436	3.15449	3.13747	3.11371	3.13798	2.97094	3.08091	3.16741	3.13321
BAE77723	bax	2.98378	2.62979	2.57534	2.67093	2.49784	2.57083	2.59305	3.13521	2.51765	2.70486	2.64547
BAE77997	rplQ	3.71662	3.36891	3.29939	3.10315	3.32863	3.21485	3.19316	3.23353	3.33387	3.31411	3.12618
BAE77798	yhiP	1.3403	1.5368	1.19171	1.41631	1.3839	1.17028	1.35624	1.36953	1.1228	1.14873	1.40817
BAA36121	adhE	2.73765	3.03805	2.64883	3.13992	3.10322	3.09531	3.01617	2.94773	3.2729	2.86135	3.08248
BAE76834	ygcI	0.997679	1.92324	1.8967	1.53071	2.10567	1.92301	2.03167	1.08084	1.87146	1.81231	1.47116
BAE78253	yjgM	2.10627	2.59335	2.41602	2.29985	2.62782	2.40778	2.56718	2.13965	2.68666	2.58459	2.31315
BAA15842	yeeF	2.74784	2.32929	2.35803	2.70185	2.66098	2.49202	2.54704	2.52163	2.54864	2.87759	2.52577
BAE77772	yhjD	1.88725	2.10432	2.00622	2.02897	1.92964	1.87479	1.98323	1.95501	1.7608	1.82109	1.95993
BAA16077	yfbF	1.12905	1.59574	1.33703	1.7248	1.30906	1.32866	1.54904	1.43635	1.17416	1.4357	1.60232
BAE77970	rpsJ	4.16094	3.87036	4.15803	4.07983	4.21992	4.20979	4.11922	4.11188	4.2021	4.14677	4.008
BAE76614	yohF	1.26417	1.59318	1.36062	1.67564	1.51573	1.43252	1.63684	1.51705	1.36926	1.26253	1.64418
BAE77141	uxaA	1.42218	1.30137	1.42034	1.49665	1.42008	1.45048	1.57932	1.62653	1.46401	1.60197	1.35979
BAA15105	narZ	0.871102	1.48668	0.893413	1.30138	1.05467	1.16946	1.30565	1.02923	1.27704	1.17169	1.35201
BAA16426	yfhQ	2.4423	2.19001	2.32714	2.29953	2.20784	2.23213	2.25602	2.45124	2.25602	2.22623	2.3467
BAA35595	ybjX	2.96961	2.82163	2.93476	3.03417	2.98303	3.05398	2.96007	3.18347	3.05692	3.0619	3.01502
BAA16173	accD	3.1601	2.81051	2.88475	2.89448	2.91213	2.82113	2.87506	3.12267	2.87439	2.90875	2.85918
BAE76480	ydgD	2.11906	2.27096	2.11538	2.19883	2.08872	2.34108	2.13799	2.05132	2.09183	2.02644	2.16376
BAA14981	ompN	0.643711	1.24616	0.808961	0.701717	0.966122	1.14309	1.06815	0.251714	1.07717	1.2095	0.672421
BAA36075	chaB	2.02327	2.28012	2.12748	2.28084	2.05336	2.23062	2.20825	2.26545	2.1153	2.01598	2.26365
BAA15501	yniA	1.9517	2.39858	2.06228	2.34353	2.14742	2.2208	2.25302	2.1928	2.02889	2.00652	2.3354
BAE76626	mglA	1.10092	0.835205	1.3509	1.02097	1.48826	1.44833	1.42752	1.55074	1.22829	1.31817	0.891091
BAB96681	aroP	2.98581	2.77903	2.93222	2.55815	2.91939	2.81387	2.78858	2.95441	2.88447	2.99939	2.78876
BAE76733	purL	2.6815	2.56285	2.88226	2.70301	2.80158	2.74299	2.73306	2.83218	2.69449	2.78005	2.70214
BAA77861	ldcC	1.2463	1.63935	1.65856	1.7484	1.58208	1.67982	1.6874	1.58061	1.54671	1.39353	1.71335
BAA35399	cydA	2.40597	3.18092	3.19609	3.22109	3.17905	3.26245	3.18211	2.56914	3.29187	3.14179	3.22886
BAE77558	glmU	2.77539	2.44172	2.80537	2.68652	2.79815	2.77349	2.68742	2.87335	2.7264	2.53884	2.66367
BAA36054	treA	1.37819	1.76791	1.85703	1.95295	1.7748	2.01035	1.95711	1.88958	1.81443	1.77292	1.9039
BAA16358	bcp	3.00773	2.765	2.81597	2.84169	2.86371	2.70117	2.76841	3.18941	2.88631	2.84129	2.81621
BAA15859	cld	2.87523	2.59709	2.82758	2.75078	2.8558	2.76555	2.78793	2.9597	2.76544	2.82997	2.6964
BAA15138	ddpF	1.00527	1.65686	1.58028	1.40792	1.32387	1.63773	1.5121	1.15384	1.31299	1.47845	1.6141
BAA35448	ybhO	1.18634	1.59285	1.3746	1.60336	1.48512	1.64011	1.65064	1.50332	1.45953	1.34802	1.61654
BAE76674	arnT	0.87873	1.1026	0.722886	0.919621	0.578145	0.593555	0.807091	0.793141	0.588373	0.745116	0.904345
BAA35640	ycaO	2.20978	1.8819	2.21676	2.13881	2.17247	2.33099	2.15012	2.20884	2.56603	2.22861	2.06987
BAE78053	qor	2.20817	2.39759	2.01961	2.49482	2.46321	2.24656	2.39499	2.29624	2.21635	2.3275	2.50389
BAA36103	rssB	1.89131	2.08166	2.08554	2.17707	1.95238	2.16374	2.12973	2.14479	2.10043	2.04484	2.17085
BAA15334	mdtJ	1.82894	2.25558	1.72708	2.2464	2.17074	2.13462	2.31197	1.87548	2.15167	2.07997	1.95885
BAE77845	yhhA	1.9063	2.21814	1.61916	1.93055	1.73116	1.65488	1.79783	1.6578	1.67551	1.59465	1.96888
BAE77470	udp	2.40108	2.58129	2.22026	2.40429	2.77614	2.34516	2.3655	2.31305	2.28818	2.49758	2.48998
BAE76868	sdaC	1.92351	1.27008	1.02042	1.15921	1.24854	1.04613	1.19496	1.54777	1.20362	1.3753	1.1716
BAB96602	carB	2.74317	2.58786	3.12887	2.79325	3.03434	3.02569	2.89391	2.97045	2.91987	2.93201	2.67978
BAA15346	rstA	2.6841	2.52591	2.576	2.73196	2.6907	2.57746	2.61572	2.76331	2.62205	2.74419	2.68677
BAA15154	dos	1.29675	1.44899	1.28515	1.52494	1.31076	1.57303	1.47217	1.29843	1.21468	1.18383	1.4476
BAE76360	ybhB	2.40922	2.57708	2.0946	2.31209	2.13018	2.21972	2.29709	2.15746	2.26763	2.31119	2.26014
BAE76440	ydcS	1.47832	1.63954	1.69262	1.71685	1.57455	1.81793	1.77512	1.71614	1.60129	1.5094	1.59134
BAE77518	rhlB	2.75499	2.62145	2.71439	2.757	2.79968	2.71286	2.71555	2.88314	2.80174	2.70732	2.72072
BAA35908	ptsG	3.05314	2.7817	2.95338	2.86066	3.24688	3.06396	2.98059	2.95997	3.06969	3.02655	2.8392
BAB96601	carA	2.87653	2.69745	3.21614	2.8924	3.12598	3.10961	3.0058	3.10795	3.0375	3.02222	2.79033
BAE76199	yajO	2.05526	2.30034	2.25669	2.36214	2.23319	2.33202	2.33768	2.32629	2.25336	2.21771	2.36382
BAE76913	yqeF	2.06728	2.01678	2.48117	2.33761	2.18673	2.27879	2.38854	2.45591	2.1782	2.25155	2.19634
BAA15579	mipA	3.05438	2.6998	3.01633	3.06162	2.8568	3.10545	2.97063	3.02512	2.92657	3.1018	2.90009
BAE78218	ytfK	2.75482	2.78539	1.62391	2.34615	2.09973	1.80604	2.15934	2.06376	1.89221	2.01693	2.36459
BAA77890	ivy	2.4667	2.3406	2.15875	2.09308	2.01386	2.07539	2.09212	2.09878	2.30177	2.45799	2.10728
BAE77835	livK	2.79073	2.40156	2.88613	2.71725	2.79233	2.75304	2.70335	2.87258	2.7763	2.79332	2.59337
BAE77866	glpD	1.33684	1.75334	1.49954	1.74472	1.55663	1.66534	1.72046	1.5146	1.50839	1.6371	1.63682
BAE78058	yjbQ	1.99703	2.43859	2.22553	2.45471	2.31111	2.12477	2.23352	2.18896	2.10656	2.04923	2.40343
BAE78151	ecnB	2.52616	2.75872	2.16562	2.3927	2.21507	2.11196	2.31781	2.39208	2.07607	1.96786	2.37244
BAA15975	yehB	0.468795	0.951632	0.828273	0.628081	0.848192	0.846152	0.956105	0.584189	0.943036	0.9722	0.620283
BAE76590	yehE	2.54556	2.5354	1.59111	1.76729	1.57622	1.5256	1.64851	1.79771	1.54858	1.69313	1.84812
BAE76724	yfgC	2.16648	2.38039	2.19044	2.36178	2.34116	2.26931	2.31217	2.20371	2.29912	2.23375	2.31871
BAA35238	ybdR	1.29143	1.54999	1.43206	1.55015	1.33501	1.52335	1.51971	1.41166	1.38288	1.48689	1.56758
BAE77273	rpsI	3.72229	3.41553	3.45817	3.35709	3.47358	3.30839	3.4226	3.46389	3.48304	3.56981	3.37641
BAA77889	yafV	1.85005	1.93067	1.75981	1.77774	1.70737	1.72588	1.78376	1.81629	1.76562	1.69466	1.82856
BAA16158	purF	2.77938	2.64209	2.97072	2.87386	2.98397	2.91461	2.89367	2.86476	2.8681	2.95844	2.73921
BAE77846	ggt	2.03616	1.49238	1.31731	1.62952	1.45866	1.46382	1.5398	1.53101	1.27386	1.61655	1.52144
BAA35949	pepT	1.9148	2.17416	2.03591	2.11492	1.94426	2.12689	2.04099	2.04566	2.21281	2.05066	2.12782
BAA35818	csgG	1.31729	1.74526	0.964361	1.28356	1.23246	1.17065	1.4659	1.32031	1.43116	1.46379	1.67316
BAA15375	ydgJ	2.39477	2.63038	2.45927	2.57441	2.48814	2.46258	2.55717	2.40194	2.52569	2.62406	2.59799
BAE77926	tsgA	1.7915	1.96694	1.28108	1.90395	1.88561	1.72646	1.7046	1.53615	1.53538	1.92129	1.91202
BAA36076	chaC	1.83346	2.13751	2.01876	2.19379	1.91962	2.07428	2.07497	2.13046	2.13947	2.02059	2.2417
BAE77197	yraQ	1.02598	0.683059	0.673081	0.709883	0.669189	0.651549	0.583388	1.39547	0.431193	0.477012	0.812208
BAE78026	lysC	2.88165	2.71191	3.13159	2.71242	3.10284	3.16676	3.00933	2.93758	3.03645	3.18668	2.70572
BAA35486	ompX	3.94449	4.013	4.14609	4.03241	3.77129	4.05753	3.99197	4.21186	4.13217	4.24544	4.06529
BAA35391	sdhB	3.02561	3.02703	3.57304	3.09073	3.24543	3.46259	3.30512	3.25678	3.34926	3.23326	3.10449
BAA15430	mdtK	1.93114	2.02079	1.64972	1.89805	1.82861	1.71196	1.82048	1.67151	1.55637	1.98204	1.82056
BAA35395	sucD	3.00762	3.00462	3.70878	3.28872	3.37702	3.6183	3.47976	3.4138	3.47046	3.42376	3.29701
BAA15335	ydgG	1.51225	1.88038	1.68963	1.50277	1.48251	1.576	1.6286	1.28515	1.65416	1.73898	1.49446
BAE77340	tufB	3.30121	3.12335	3.37774	3.36085	3.51751	3.49431	3.44385	3.42759	3.37563	3.56111	3.32589
BAE77690	yibL	2.69636	2.37391	2.40958	2.19218	2.56336	2.34452	2.39265	2.68039	2.61119	2.50341	2.25019
BAE76361	bioA	1.99067	2.39427	2.1158	1.90611	2.11013	2.21984	2.0132	2.04289	2.1004	2.33155	1.89995
BAE76630	folE	3.15197	2.9215	3.155	3.01316	3.04502	2.87777	2.97665	3.22849	3.14056	3.03997	3.09163
BAE76498	ydhV	0.404997	1.13397	1.14377	0.829406	1.2572	1.19549	1.16009	0.633861	1.5969	1.17782	0.849595
BAA16487	aroF	2.74994	2.53029	2.91343	2.73919	2.92322	2.86524	2.64784	2.71962	2.46243	2.97545	2.59441
BAB96742	dapD	3.19003	3.03931	3.24954	3.06207	3.29254	3.28022	3.20183	3.15785	3.28092	3.21272	3.13353
BAE77787	yhiF	0.615676	2.23251	2.18153	2.29328	1.73894	1.38691	1.90537	1.23161	1.3358	0.697719	2.07065
BAE76453	bdm	1.56804	1.88793	0.80627	1.0891	1.14546	1.31376	1.25237	0.718733	1.21337	1.64396	1.34402
BAE77929	fic	1.26209	1.63762	1.56447	1.85797	1.73791	1.64854	1.7985	1.59505	1.52009	1.37881	1.83944
BAE77513	wzzE	2.14471	1.79915	2.0592	1.79256	2.0139	1.80635	1.86964	2.1065	1.97251	1.99948	1.92587
BAA15860	ugd	1.60235	1.99628	1.92152	2.15859	2.08996	2.06349	2.06594	1.8764	1.97106	1.96818	2.03784
BAA16388	purN	2.77238	2.5492	2.81282	2.69489	2.87892	2.61171	2.7591	2.77387	2.69921	2.79438	2.6621
BAA15104	narY	0.662501	1.28172	0.863206	1.11367	0.931863	0.981201	1.06897	0.978362	1.12379	1.06909	1.18484
BAE78202	priB	3.0938	2.84849	3.1444	3.02623	3.20189	3.18139	3.08415	3.06326	3.1719	3.14002	2.97112
BAE76632	cirA	1.46423	1.60937	1.5213	2.05564	1.8721	2.0213	2.31014	2.19388	0.992131	2.06174	1.59279
BAA35400	cydB	2.28333	3.02298	3.11463	3.13154	3.08024	3.19187	3.08114	2.48909	3.19494	3.04788	3.13695
BAE77337	rplK	3.63429	3.41777	3.64287	3.52469	3.66868	3.59388	3.56466	3.55705	3.6423	3.64784	3.45236
BAE76365	bioD	2.20936	2.61918	2.18364	2.18319	2.36149	2.24882	2.11534	2.2413	2.31077	2.45408	2.03398
BAA35227	cstA	1.71813	1.74417	2.52643	1.93514	1.89776	2.18832	2.11963	2.23424	2.10261	1.83748	1.9731
BAE76483	blr	2.69657	2.66732	2.24089	2.17429	2.1619	2.07214	2.15301	1.80203	2.30269	2.27524	2.16108
BAE76257	ybaL	2.12649	1.98251	2.59044	2.04871	2.12586	2.39667	2.07422	2.27942	2.21799	2.03649	1.99022
BAE77760	yhjR	2.44339	2.61653	2.66023	2.39146	2.58283	2.39658	2.40374	2.14712	2.41578	2.38216	2.48227
BAA15556	ydjA	2.15124	1.77153	2.07135	2.28373	1.85209	2.04065	1.97429	2.36109	1.88774	1.86663	2.26619
BAE77514	rfe	2.31463	2.00085	2.19128	2.00998	2.18642	2.03571	2.07011	2.29021	2.22092	2.11785	2.06738
BAE78047	yjbJ	2.18572	2.51747	1.8046	2.17341	1.90293	1.74412	2.04379	1.9266	1.83496	2.07019	2.22391
BAA15081	yncB	1.35142	1.75917	1.64433	1.92318	1.69905	1.77743	1.88837	1.67119	1.68206	1.6041	1.88807
BAA15061	ydcO	1.48851	1.95099	1.79303	1.75066	1.33569	1.19917	1.34638	1.84943	1.8744	1.7387	1.81765
BAE77334	rplL	4.07513	3.80254	4.21418	4.04589	4.23368	4.2082	4.13871	4.19569	4.25322	4.23521	4.02881
BAE76215	bolA	3.08257	3.26361	2.95124	3.04985	2.89081	2.94771	2.99109	2.98052	2.99534	2.96993	3.04742
BAE76654	yejO	1.30577	1.50737	1.41791	1.42479	1.44543	1.32472	1.46875	1.3129	1.30531	1.37995	1.40422
BAA16281	yfeH	2.13205	2.34279	2.24571	2.04561	1.88104	1.70397	1.97264	2.32461	2.12349	2.16995	2.27579
BAE78242	yjgF	3.1966	3.24209	3.49349	3.32544	3.27918	3.42756	3.30788	3.51888	3.33509	3.24058	3.28692
BAA35447	ybhN	1.03393	1.3243	0.842146	1.06022	0.975684	1.08183	1.16781	1.02868	0.987282	0.902626	1.10624
BAE76818	rpoS	3.13639	3.50853	3.13287	3.44347	3.15972	3.22444	3.30428	3.19864	3.03658	3.3898	3.49625
BAE76828	cysN	2.63693	2.56006	2.75393	2.87241	2.97617	3.01626	2.88028	2.79632	2.77956	2.81362	2.72593
BAE76673	yfbH	1.04695	1.367	1.18736	1.40674	1.15547	0.991156	1.30468	1.28751	0.938571	1.16304	1.36032
BAE76364	bioC	1.86415	2.31657	1.89133	1.8304	2.02627	1.94446	1.79851	1.82941	1.97534	2.09019	1.80978
BAE78283	fecR	1.22648	0.92586	0.891671	1.13945	1.00467	0.970727	1.06527	1.38911	0.732129	1.05045	1.1665
BAE76270	ybbM	1.28509	1.66399	1.77589	1.67434	1.75441	1.81194	1.76179	1.41555	1.82847	1.7268	1.69209
BAA16577	glgS	2.67707	2.44215	1.82532	2.08128	1.73671	1.6532	1.80174	1.83309	1.71687	1.77974	2.13769
BAA15997	yojL	1.24416	1.22241	1.18621	1.28627	1.4688	1.3839	1.43963	1.70252	1.38829	1.24222	1.28934
BAE77559	glmS	2.82746	2.4472	2.84145	2.69278	2.83376	2.8243	2.73853	2.9569	3.08023	2.59733	2.69628
BAA15444	ydhY	0.462747	1.37683	1.22092	0.801036	1.41979	1.11404	1.28059	-0.133156	1.7372	1.40588	0.799006
BAA14839	gmr	1.80569	2.00395	1.94713	2.18392	1.81245	2.19235	2.12338	2.0937	1.98354	2.00458	2.02976
BAE77635	setC	0.48952	1.04914	0.61976	0.437213	0.85774	0.617688	0.792404	0.28718	0.687094	0.771644	0.310617
BAA14799	trpE	2.43856	2.2963	2.64757	2.57444	2.72102	2.77191	2.58539	2.56528	2.52851	2.73034	2.44858
BAE77588	yidC	2.83436	2.54663	2.77021	2.6692	2.80246	2.72706	2.74114	2.74619	2.71914	2.85797	2.64879
BAA35390	sdhA	2.90235	2.93524	3.54459	3.09672	3.24276	3.4402	3.28349	3.20978	3.30915	3.20468	3.09061
BAA15636	yebQ	0.734752	0.506141	0.159934	0.142952	-0.0511332	0.354449	0.278864	1.13846	0.0374772	0.274725	0.246349
BAE76484	ydgT	2.21326	2.06413	1.95953	1.8995	1.94251	2.02036	1.93315	1.50731	1.91647	2.03554	1.83191
BAE77878	gntX	1.78305	1.53907	1.77435	1.90006	1.80892	1.89364	1.71018	1.98167	1.68825	1.75773	1.86129
BAA35896	yceD	3.59318	3.42271	3.49372	3.44793	3.45981	3.62471	3.43223	3.51207	3.52761	3.57245	3.41495
BAA35743	appC	0.825169	1.3082	1.19707	1.67855	1.04454	0.998871	1.23979	0.865611	0.957769	0.761557	1.39484
BAA16279	yfeN	1.11298	1.40222	1.06576	1.13866	1.15833	0.997495	1.17129	0.990943	1.12596	1.12799	1.15787
BAA16207	yfdC	1.40434	1.63989	1.36431	1.43847	1.47993	1.41889	1.57869	1.49956	1.42812	1.3424	1.52115
BAE77622	ilvB	2.24923	2.44572	2.69146	2.7632	2.75157	2.70975	2.77775	2.74142	2.5871	2.99684	2.55943
BAB96616	folA	2.47244	2.27108	2.39238	2.42965	2.64246	2.45706	2.50997	2.39743	2.51592	2.55357	2.38621
BAA15039	cybB	2.45631	2.29886	2.46256	2.42744	2.26278	2.49732	2.34272	2.5571	2.58721	2.50469	2.39915
BAA16459	glyA	3.60202	3.3688	3.7458	3.50774	3.6943	3.53151	3.50576	3.60715	3.58992	3.56347	3.5391
BAE77142	uxaC	1.56522	1.52832	1.72817	1.8573	1.81003	1.85471	1.92342	1.93541	1.80203	1.9579	1.63219
BAE78204	rplI	3.65842	3.37132	3.48761	3.40183	3.61003	3.5495	3.50459	3.48043	3.52008	3.55283	3.35595
BAA14798	trpD	2.24858	2.14809	2.44636	2.36464	2.4959	2.51352	2.36097	2.37005	2.32354	2.49579	2.25565
BAE77841	ugpA	1.13738	1.41201	1.13254	1.26672	1.22325	1.23677	1.39371	1.14361	0.911039	1.24722	1.24844
BAE77335	rplJ	3.98255	3.68761	3.84911	3.71658	3.89465	3.81685	3.80275	3.85624	3.88702	3.88227	3.70671
BAE78252	yjgD	2.99602	2.92229	3.12262	2.97349	3.13073	3.1186	2.98225	3.08723	3.04646	3.08475	2.975
BAA15657	purT	2.24456	2.02113	2.44037	2.22121	2.1961	2.26855	2.21298	2.33065	2.1873	2.36291	2.24194
BAE78176	hflC	2.74404	2.58485	2.8752	2.72996	2.73152	2.84267	2.71721	2.88543	2.79748	2.7697	2.7058
BAE76434	ydcJ	1.38015	1.58509	1.56746	1.68715	1.55754	1.73648	1.71784	1.58588	1.57526	1.41423	1.55326
BAA35836	ymdC	1.36146	1.64222	1.5895	1.65584	1.44196	1.6342	1.63193	1.60683	1.57892	1.38751	1.64986
BAA36063	ychH	2.35562	2.53366	2.14051	2.0702	1.99146	1.89082	2.18491	1.93427	2.08862	1.81127	2.20523
BAA35744	appB	1.08218	1.41019	1.22576	1.62094	1.18022	1.08032	1.26784	0.984087	1.09922	0.923416	1.39559
BAE78062	yjcB	1.93634	2.28658	1.48285	1.71294	1.59417	1.52166	1.4666	1.60702	1.27655	1.79663	1.93761
BAA35641	ycaP	1.49043	1.78521	1.71407	1.90888	1.69493	1.84707	1.8296	1.81973	1.72755	1.5698	1.83896
BAE76367	ybjM	1.68306	1.88567	1.75552	1.79056	1.70804	1.97052	1.64546	1.39433	1.70253	1.64851	1.74751
BAA16429	csiE	1.51509	2.12259	2.11549	2.1173	2.068	2.02068	2.27079	2.02788	1.97564	1.85502	1.97832
BAE77482	rarD	1.54875	1.30484	1.31198	1.20408	1.49993	1.32295	1.40026	1.327	1.31104	1.53382	1.21938
BAA15178	ydeT	1.05936	1.21649	1.10661	1.18373	0.363607	0.989742	1.16176	1.0092	0.943619	1.28868	0.970686
BAA36065	prsA	3.10014	2.97363	3.07985	2.95701	2.99695	3.12494	3.02953	3.07915	3.13014	3.16268	3.00618
BAE77274	rplM	3.93968	3.71928	3.85337	3.80242	3.9145	3.82999	3.83529	3.8492	3.85658	3.92378	3.76445
BAA15609	fadD	1.78916	1.66008	1.75297	1.60592	1.63861	1.77419	1.7862	1.87161	1.54449	1.75903	1.54892
BAA16488	yfiL	1.60409	1.70306	1.37382	1.57033	1.49712	1.48037	1.6281	1.43023	1.18447	1.44639	1.48365
BAE77006	galP	1.76874	2.00342	1.80602	1.8575	2.1124	2.06278	2.05563	1.75686	1.89756	2.14204	1.86727
BAE76226	cof	1.69464	1.05847	0.905034	1.00987	0.649346	0.857776	0.694237	1.61188	0.660442	0.856632	0.965125
BAA14926	uspE	2.4607	2.69365	2.58186	2.535	2.40493	2.57425	2.49527	2.5198	2.57753	2.62791	2.57134
BAE78232	fbp	2.68737	2.43123	2.60513	2.42879	2.56173	2.56017	2.49063	2.56392	2.55215	2.57905	2.46891
BAE77575	yieF	2.31155	2.30131	1.97256	2.16429	2.10951	1.99481	2.10277	2.00304	2.07261	2.13495	2.16867
BAA16245	oxc	0.494031	1.09013	1.02518	1.26262	0.848127	0.914207	1.02299	0.407183	0.604706	0.97841	1.14226
BAA15974	yehA	0.0137222	1.06326	0.576478	0.471839	0.951117	0.814268	1.00454	0.193239	0.926263	1.01409	0.488515
BAE76721	ypfG	1.12573	1.42245	1.30748	1.28641	1.29558	1.1835	1.31327	1.35342	1.40896	1.70526	1.46316
BAA15092	ydcE	2.60894	2.77256	2.43763	2.42291	2.11549	2.44053	2.33954	2.22945	2.48965	2.41359	2.37656
BAA36058	dhaR	1.30334	1.10284	1.08506	1.29819	0.994811	1.17317	1.06612	1.54416	1.14132	1.09974	1.24615
BAA35745	appA	1.35153	1.63655	1.50157	1.79106	1.40771	1.43871	1.52083	1.38999	1.45445	1.45573	1.64766
BAE76811	pphB	0.741241	1.28267	0.897189	0.900904	0.917986	0.974834	1.11394	0.727322	0.923065	1.08105	0.746542
BAE78178	purA	3.32147	3.08079	3.28201	3.14757	3.21259	3.1764	3.18236	3.33239	3.31706	3.36417	3.22718
BAE77980	rpsQ	2.86234	2.48304	2.35475	2.15091	2.32237	2.13139	2.24023	2.43741	2.54306	2.3861	2.32304
BAA15897	wcaM	1.18038	1.24469	1.16871	1.31933	1.2055	1.22407	1.23984	1.03585	1.21488	1.13639	1.21077
BAA35926	ycfQ	2.08759	1.50675	1.73099	1.82032	1.65727	1.79972	1.53004	2.2813	1.64746	1.67716	1.78828
BAA15068	ydcP	2.07491	1.94856	2.03108	2.14271	2.03853	2.212	2.11901	2.18112	2.25864	2.09829	2.053
BAE77728	xylA	1.22871	1.3699	1.62841	1.33308	1.41061	1.30432	1.32623	1.17876	1.09066	1.19897	1.36258
BAA15538	astD	0.982987	1.33153	1.19082	1.20159	1.07539	1.27849	1.36645	1.0043	0.99659	1.06831	1.1792
BAA15254	cspI	1.32377	2.2483	2.276	2.39993	2.43904	1.91107	2.10236	2.3337	2.04144	2.11842	2.23896
BAE76620	cdd	1.39364	1.69536	1.10843	1.48987	1.80638	1.30947	1.31625	1.2578	1.22475	1.43205	1.54903
BAE78017	aceA	3.23351	3.89976	4.19443	3.75175	3.96974	3.97128	3.83477	3.588	3.76253	3.80266	3.81883
BAE76181	brnQ	2.07998	1.50303	1.27285	1.50438	1.75629	1.14499	1.45961	1.47466	1.57661	1.37776	1.4296
BAE77294	yhdA	2.03731	2.08754	1.845	1.97346	2.03602	1.85926	1.98037	1.83721	1.97794	1.86754	1.95573
BAE77313	purH	2.59984	2.50351	3.08965	2.83373	2.99055	2.92257	2.8579	2.93409	2.88464	2.93313	2.74524
BAA16262	mntH	1.75585	1.95059	1.63656	1.78476	1.65921	1.5317	1.80121	1.7138	1.52858	1.56432	1.80891
BAA16075	ais	1.09113	1.32146	1.10956	1.35387	0.959451	0.687339	1.03046	1.16775	0.987965	1.186	1.28561
BAA15988	yejF	1.62534	1.35383	1.45281	1.53762	1.3037	1.24634	1.43424	1.70224	1.34039	1.40085	1.45781
BAE76808	fhlA	1.34808	1.4707	1.20674	1.46907	1.4171	1.31188	1.43431	1.37694	1.2923	1.0279	1.44837
BAE76542	yebW	2.35084	2.48692	2.19138	2.31119	2.25578	1.98099	2.23563	2.24988	2.10137	2.06486	2.22159
BAA16273	xapR	1.48831	1.79587	1.59321	1.54478	1.6795	1.44292	1.60368	1.54701	1.52631	1.65152	1.49768
BAE76827	cysC	2.33787	2.09225	2.44181	2.46834	2.62521	2.69593	2.51186	2.41868	2.40478	2.4626	2.31297
BAE76819	nlpD	2.47086	2.79912	2.73236	2.82306	2.65446	2.61671	2.73169	2.68867	2.55378	2.76902	2.88216
BAE76613	yohD	1.92296	2.01149	1.79386	1.90927	1.79086	1.7254	1.85061	1.79464	1.76018	1.64346	1.90131
BAA35671	ycbB	1.8877	2.0815	1.9423	2.02409	1.83418	2.0534	1.9306	1.89474	1.97498	1.84745	1.96624
BAE77048	pitB	0.584284	1.21706	0.836167	0.943399	1.54743	1.01953	1.21327	0.835761	1.17813	1.25235	0.875288
BAE78129	yjdJ	1.67853	1.91061	1.88878	1.94528	1.7576	1.90405	1.95737	1.82136	1.88068	1.77445	1.9145
BAE77949	rpsL	3.81674	3.56045	3.54046	3.3326	3.46883	3.40308	3.38664	3.48612	3.54905	3.55084	3.36919
BAA15173	ydeO	0.300564	1.14611	0.927498	1.09118	0.768721	1.02529	0.812039	0.573472	0.886327	0.95419	0.899484
BAA15587	yeaJ	1.37193	1.7128	1.16992	1.70979	0.400964	1.37349	1.48932	1.44547	1.30102	1.63795	1.55394
BAE76252	htpG	2.6855	2.46773	2.73718	2.5799	2.74502	2.94931	2.70799	2.6676	2.87566	2.69766	2.48634
BAA16263	nupC	2.38706	2.19253	2.13544	2.21523	2.43608	2.25034	2.30943	2.30896	2.23585	2.34733	2.2093
BAE76705	yfdX	0.704319	1.29137	1.22532	1.38181	1.13765	1.16468	1.17923	0.559624	1.07001	1.07127	1.30505
BAE77230	rplU	3.71446	3.45591	3.64303	3.61738	3.74126	3.75418	3.66591	3.62678	3.6254	3.65283	3.52637
BAA15539	astC	0.89431	1.45505	1.23458	1.36996	1.24512	1.40775	1.54483	1.07499	0.975126	1.18813	1.23528
BAA14782	kch	1.65638	2.0222	1.94995	2.0536	1.77901	1.75132	1.86005	1.80754	1.80299	1.77304	1.93965
BAE77148	yqjD	1.92049	1.97469	1.49605	1.56946	1.4139	1.41867	1.49104	1.40061	1.30918	1.31572	1.67636
BAA16481	yfiA	3.56727	3.60784	3.04821	3.30975	3.21898	3.11234	3.19135	3.03968	3.36214	3.55789	3.25442
BAA14832	pgpB	1.80602	1.87233	1.85518	1.88316	1.75938	1.83666	1.86557	1.85954	1.80638	1.7725	1.94259
BAA15678	yecD	2.0881	2.28339	2.05954	2.29904	2.10899	2.15855	2.22637	2.07912	2.26458	2.16071	2.25373
BAA14781	cls	2.20151	2.32527	2.26393	2.2876	2.18937	2.22657	2.25704	2.25448	2.27858	2.25845	2.27068
BAA35319	nagC	2.07155	1.86687	1.97925	2.01159	1.9285	1.99937	1.9656	2.25913	1.96022	1.90189	2.04129
BAE77502	yifK	2.04415	1.85513	1.9773	1.92863	2.21134	1.93571	2.04548	2.0089	2.06856	2.06311	1.80576
BAE76490	ydhF	2.06488	2.20323	2.04182	2.11207	2.12143	2.12883	2.1515	2.10205	2.09902	2.0204	2.11258
BAE77659	kdtA	2.2011	1.97661	1.98855	2.04748	2.21924	1.938	2.05854	2.05341	2.0514	2.02809	1.91914
BAE76196	nusB	2.68172	2.59402	2.99447	2.76286	2.92672	2.99018	2.79868	2.89958	3.04903	2.94729	2.82828
BAA15483	rplT	3.92369	3.62721	3.41126	3.29387	3.37977	3.33834	3.35319	3.42978	3.40738	3.34742	3.33038
BAA35693	ycbQ	0.638457	1.42941	1.26238	0.923607	1.22133	1.49139	1.26009	0.752207	1.33613	1.28367	0.804535
BAA77878	dkgB	1.52011	1.15299	1.31486	1.46833	1.5114	1.76255	1.70091	1.62076	1.63914	1.4554	1.64156
BAE77799	uspA	3.46862	3.56563	3.42877	3.5417	3.50146	3.49991	3.47846	3.44164	3.41474	3.46748	3.54606
BAA35551	ybjL	1.92999	1.97333	1.95786	1.79086	1.77372	1.89845	1.87029	1.75281	1.96453	1.87996	1.86266
BAA15453	sufA	1.58293	2.10315	1.7361	2.12302	1.63875	1.92287	2.07196	1.91505	1.45696	1.75975	1.98891
BAA35895	yceF	2.30383	2.52988	2.31889	2.41937	2.2204	2.43084	2.3875	2.42034	2.48469	2.4485	2.45691
BAA16164	folC	1.87826	1.61547	1.89223	1.85676	1.89842	1.83339	1.87834	2.09318	1.86595	1.97708	1.85725
BAE76267	ybbJ	1.85328	2.09204	2.03674	1.91988	1.83332	2.0116	1.94698	1.74465	1.97131	1.95477	1.96707
BAA16073	yfaY	1.98984	2.07226	1.84291	2.02029	1.89505	1.7862	1.90264	1.90726	1.9399	1.85483	1.97972
BAA35317	asnB	2.43155	2.57999	2.84793	2.72075	2.92407	2.84706	2.8203	2.80889	2.90022	2.94203	2.68911
BAA15395	ydgR	1.62097	1.64355	1.03306	1.41505	1.47506	1.16088	1.53572	1.08309	1.25973	1.53555	1.28369
BAE77925	nirB	0.744864	0.970978	0.620862	0.938945	0.614972	1.13543	0.801225	0.592379	1.86855	0.862616	1.07231
BAA15531	spy	1.7093	1.88504	1.72882	1.92748	1.61988	1.97151	1.91048	1.6263	1.7897	1.89253	1.72921
BAA15830	sbmC	1.70281	2.04805	2.04678	2.17862	2.09071	1.9772	2.1844	1.95814	1.991	1.9941	2.19742
BAE76216	tig	3.41146	3.2856	3.50164	3.46408	3.61006	3.75686	3.48583	3.46747	3.59797	3.60081	3.40409
BAE76251	recR	2.64613	2.53576	2.71469	2.53277	2.64616	2.64163	2.56663	2.6419	2.80275	2.72369	2.60793
BAA15981	yeiQ	1.42857	1.33956	1.5831	1.6037	1.50548	1.66107	1.6995	1.70726	1.57623	1.79385	1.43361
BAE77698	yibJ	0.687623	1.19207	0.985057	0.586084	1.17917	1.04607	1.09508	0.593652	0.966163	1.0061	0.969889
BAE78381	slt	2.07382	2.27763	2.15873	2.22333	2.30926	2.1409	2.18849	2.09289	2.21013	2.09454	2.18651
BAE76221	ppiD	2.5318	2.4803	2.7875	2.66602	2.64553	2.85786	2.63215	2.72871	2.79314	2.79793	2.63813
BAE78070	yjcH	1.38009	1.41136	2.4106	1.75571	1.86785	2.11344	2.09166	1.89441	1.71627	1.79612	1.63378
BAE77574	yieG	2.52666	2.29995	2.40389	2.20949	2.22393	2.18797	2.25256	2.38745	2.42259	2.36021	2.24514
BAE78246	yjgH	1.51868	1.8689	1.47746	1.97888	1.79649	1.74448	1.88727	1.73091	1.47731	1.60327	1.82382
BAE78175	hflK	2.73203	2.6019	2.92981	2.81947	2.79841	2.89892	2.79063	2.96877	2.85358	2.83422	2.76674
BAE76841	cysJ	2.94649	2.75169	2.99389	2.88245	3.30907	3.14539	3.06037	3.05172	3.10018	3.16807	2.91587
BAE76213	ampG	1.99063	1.80617	2.01672	1.77114	1.90471	1.93094	1.88849	2.00807	2.05847	1.89076	1.81498
BAE77820	yhhS	1.74869	1.51786	1.66313	1.47618	1.65505	1.46462	1.53941	1.70179	1.75561	1.60633	1.53409
BAE77590	rnpA	2.24548	1.89142	2.12248	1.84453	2.06585	1.79963	1.98129	2.06435	1.9921	2.1098	1.93317
BAE77217	argG	2.99637	2.76228	3.40647	3.05589	3.23932	3.32896	3.1479	3.18747	3.0813	3.27761	2.90826
BAE76747	rseB	2.30356	2.55986	2.3723	2.48052	2.52774	2.41493	2.52476	2.3782	2.54684	2.4312	2.46982
BAE76301	lpxH	1.87638	1.85492	1.89969	1.92211	1.92366	1.94456	1.91615	1.97923	1.98858	1.99984	1.92784
BAE76185	queA	1.99167	1.87011	2.11037	1.99652	2.08822	2.11501	1.97696	2.06955	2.28458	2.01716	1.94555
BAA15805	cbl	1.90341	1.64542	1.82965	2.01656	2.16651	2.36057	2.15766	1.79883	1.92534	1.99134	1.77647
BAE76517	astA	0.618233	1.26289	1.22571	1.20692	1.0962	1.32692	1.38511	0.884541	0.831735	1.13004	1.0279
BAA15396	gst	2.51127	2.78012	2.60429	2.77345	2.60218	2.70896	2.69212	2.62295	2.63963	2.7115	2.6809
BAA35407	pal	3.22746	3.14002	3.50884	3.24106	3.26541	3.35757	3.248	3.46661	3.47068	3.35761	3.27279
BAE76180	phoR	1.42871	1.27317	1.28723	1.34343	1.18048	1.32905	1.28888	1.52807	1.34808	1.35588	1.26751
BAA16309	ucpA	2.13433	1.90843	2.2134	2.01887	2.16917	2.04206	2.05341	2.12364	2.04199	1.93005	1.98635
BAE77463	tatC	2.36299	2.15725	2.25054	2.09523	2.27383	2.19133	2.16876	2.19281	2.1679	2.23293	2.06485
BAA35733	yccX	2.10901	2.27644	2.12787	2.15562	1.99501	2.16113	2.12551	2.13798	2.19267	2.15436	2.19366
BAE76646	yejG	2.70261	2.90249	2.57284	2.71445	2.6032	2.4538	2.63436	2.55364	2.55535	2.63876	2.65967
BAE77512	rffE	1.9506	1.66405	1.92658	1.87767	2.0871	1.91711	1.99375	2.05617	1.96817	2.08042	1.94992
BAA16386	upp	2.86622	2.82896	3.07757	2.93536	2.81895	3.00194	2.89889	2.96564	2.94545	3.17169	2.84007
BAE76742	era	2.34915	2.19425	2.41432	2.37126	2.29597	2.28773	2.32648	2.48675	2.2412	2.36604	2.36921
BAA15784	yedQ	1.61529	1.72522	1.57742	1.59404	1.47621	1.38479	1.52531	1.51222	1.45414	1.35578	1.56528
BAE76203	thiI	2.07806	1.98703	2.33758	2.02955	2.06916	2.33083	2.08939	2.18054	2.3727	2.22048	2.07394
BAE77137	ygjR	1.9475	1.98787	1.9089	1.97453	2.02026	1.79986	1.94446	1.92093	1.99285	1.84216	1.89293
BAA15190	ydeK	0.51545	0.936283	0.967951	0.826659	0.889448	1.06869	0.958711	0.763199	0.923102	0.860049	0.896429
BAE78149	efp	3.243	3.09694	3.04306	2.99387	3.2209	3.13672	3.11873	3.12292	3.16246	3.23861	3.08546
BAA15449	ydiB	0.376568	1.18817	1.06516	0.883478	1.03344	1.14605	1.08337	0.783064	1.13442	1.35277	0.740453
BAE78069	actP	1.37025	1.47451	2.36362	1.69916	1.80894	2.03941	2.06219	1.86522	1.67867	1.76366	1.65057
BAE77233	murA	2.47131	2.31967	2.51804	2.54254	2.56957	2.44236	2.51674	2.63133	2.4323	2.57977	2.50595
BAE77950	rpsG	3.46925	3.34512	3.44425	3.3077	3.45366	3.44861	3.34044	3.38634	3.44802	3.44436	3.25784
BAA35901	fabG	3.43919	3.26776	3.53551	3.44686	3.42246	3.55152	3.43476	3.5058	3.22162	3.46417	3.43848
BAE76269	ybbL	1.53758	1.87094	2.05247	1.9646	1.95134	2.09148	1.98866	1.76262	2.16601	1.9622	1.9604
BAE77981	rplN	3.91079	3.76705	3.98801	3.87366	3.99507	3.96444	3.93283	3.9448	3.99736	4.00785	3.85571
BAE77107	cca	2.23128	1.96018	1.99367	2.12417	2.02779	1.88627	2.00866	2.22114	1.92523	1.96674	2.10001
BAE76189	secF	2.46057	2.29594	2.54133	2.38728	2.5442	2.50965	2.4469	2.48317	2.53107	2.43199	2.42717
BAA15347	rstB	2.23194	2.04457	2.03149	2.1168	2.05946	1.91027	2.03339	2.14437	2.00606	2.17994	2.08618
BAE77229	rpmA	3.59185	3.25396	3.15273	2.92028	3.01495	2.98038	2.97205	3.04878	3.09086	3.12638	2.97609
BAB96746	tsf	3.35478	3.11611	3.35396	3.28837	3.46276	3.42402	3.3367	3.35197	3.3663	3.41551	3.28075
BAE77519	gpp	2.30217	2.19425	2.39426	2.38429	2.46659	2.30519	2.35829	2.51141	2.39433	2.28612	2.34929
BAE77861	glgX	2.22849	2.40716	2.38341	2.53018	2.51993	2.58029	2.53363	2.42714	2.32664	2.45638	2.49349
BAE77324	rsd	2.84247	2.97144	2.53405	2.657	2.67119	2.35244	2.64285	2.55806	2.47459	2.74259	2.72825
BAE76688	yfcL	2.37602	2.05134	2.3022	2.09723	2.04764	2.064	2.13191	2.30024	2.25659	2.20562	2.09774
BAE77096	ygiE	2.19578	2.28019	2.03594	2.15661	2.13008	1.96241	2.11979	2.10281	1.99942	2.10637	2.13966
BAA35925	ycfJ	1.1659	1.48196	1.2049	1.04225	1.19051	1.09681	1.21003	1.1419	1.68002	1.96559	1.47025
BAE77639	yicE	2.56657	2.33666	2.52403	2.18748	2.32388	2.23032	2.16198	2.42948	2.41763	2.45662	2.19593
BAE76756	yfiR	1.75141	1.61561	1.56393	1.66287	1.56696	1.34665	1.52362	1.47013	1.56683	1.56984	1.70774
BAE77456	pepQ	2.35771	2.37436	2.66766	2.44621	2.53157	2.62227	2.51599	2.56315	2.598	2.48231	2.45256
BAA35872	grxB	2.81363	3.09541	2.72456	2.84906	2.77525	2.74181	2.75206	2.84114	2.80548	2.93977	2.93338
BAA36094	narG	0.754733	0.959582	0.780973	1.02535	0.595612	0.775066	0.85156	0.771143	1.35013	0.657978	1.02095
BAA16503	yfjF	1.91134	1.65075	1.74335	1.48649	1.67713	1.50136	1.52688	1.82367	1.64422	1.6953	1.56738
BAA16312	yfeU	1.05349	1.03012	1.23044	1.10326	1.26709	1.20852	1.21578	1.49082	1.15576	1.10804	1.18017
BAE76448	yddH	1.16605	1.38505	1.12386	1.29831	1.03425	1.14931	1.11025	1.10502	1.21574	1.0956	1.35021
BAE76592	metG	2.59433	2.45895	2.57577	2.59256	2.62073	2.48771	2.50586	2.66726	2.50424	2.64641	2.53089
BAE77292	mreC	2.30833	2.13456	2.21678	2.12995	2.30762	2.06151	2.19413	2.24016	2.20442	2.26083	2.11074
BAE78170	amiB	1.72652	1.86674	1.8638	1.80884	1.8411	1.7776	1.79571	1.7677	1.74748	1.6986	1.84039
BAE76587	yohN	2.7212	2.70656	2.08992	2.28883	2.21165	1.99753	2.22318	2.25228	2.35323	2.43686	2.30966
BAE76712	yfeY	2.29898	2.34987	2.12397	2.20343	2.29547	2.15582	2.27793	2.12006	2.36614	2.36899	2.19038
BAA35401	ybgE	1.98214	2.32694	1.9948	1.83329	1.74547	1.87653	1.87311	1.45137	2.10596	2.02527	2.06308
BAE76546	yobB	1.89215	2.08448	1.81849	1.96874	1.76747	1.86738	1.91792	1.74981	1.99908	1.83156	1.88925
BAB96700	hpt	2.70438	2.46972	2.56704	2.46243	2.48214	2.52414	2.51988	2.69088	2.63042	2.61337	2.48887
BAE76840	cysI	2.87934	2.75391	3.10849	3.00664	3.4019	3.26065	3.1676	3.12767	3.13906	3.26493	3.02565
BAA35599	cspD	3.71414	3.68088	3.11097	3.01186	2.66406	2.93821	3.05681	3.06297	2.97585	2.98883	3.08687
BAE77632	yicS	1.54382	1.7369	1.47594	1.555	1.64279	1.60234	1.54657	1.56855	1.4307	1.42388	1.62243
BAE77336	rplA	3.4769	3.29989	3.59734	3.49158	3.66085	3.59664	3.55076	3.55246	3.60891	3.60345	3.42603
BAA16576	yqiH	0.517312	1.06596	1.05086	0.691857	1.00763	0.981671	1.11742	0.538205	1.07721	1.21466	0.689046
BAA15333	mdtI	1.18959	1.64431	1.30832	1.63924	1.5979	1.36318	1.65006	1.26866	1.4848	1.44877	1.28415
BAA16385	uraA	1.96305	2.10014	2.28924	2.3293	2.32304	2.42968	2.3579	2.37532	2.2807	2.65581	2.20943
BAE77349	sthA	2.55917	2.51352	2.53594	2.55596	2.6188	2.37453	2.59355	2.63919	2.45405	2.32492	2.54143
BAE77975	rpsS	3.17519	3.04063	3.6528	3.46952	3.64507	3.62736	3.52699	3.58284	3.69598	3.60375	3.49102
BAA16387	purM	2.9817	2.86481	3.02573	2.9065	3.10418	2.9239	2.98014	2.99179	2.88647	2.97573	2.88926
BAA16159	cvpA	3.17806	2.94341	3.20055	3.08338	3.20773	3.09058	3.11919	3.08601	3.05252	3.15951	3.01972
BAA35732	yccW	2.27667	2.28984	2.43302	2.43127	2.48131	2.56721	2.45472	2.43955	2.65706	2.5331	2.38498
BAE78203	rpsR	2.14731	1.79728	1.76575	1.4557	1.62686	1.46694	1.48929	1.65479	1.83866	1.7438	1.57452
BAE77584	tnaA	1.12445	0.910689	1.46692	1.17244	1.1906	1.43734	1.49019	1.68159	1.25093	1.17595	1.00602
BAE77000	speB	2.18596	2.17328	2.48695	2.33781	2.69555	2.55082	2.40237	2.46933	2.45696	2.55819	2.28282
BAA36061	ychF	2.62968	2.52552	2.7081	2.56436	2.65939	2.87514	2.6517	2.72236	2.85995	2.81844	2.52896
BAA35394	sucC	2.90297	2.93552	3.66259	3.2258	3.32523	3.56734	3.41218	3.35539	3.39843	3.34014	3.2382
BAA35392	sucA	2.76742	2.77427	3.34547	2.94676	3.08227	3.22825	3.1722	3.07581	3.16097	3.06212	2.97754
BAE77764	bcsC	1.32707	1.44416	1.69114	1.55126	1.63035	1.51286	1.53578	1.34002	1.47576	1.48358	1.55895
BAA16293	yfeK	1.32812	1.61532	1.32263	1.51476	1.54043	1.57019	1.60024	1.0672	1.57945	1.56115	1.51036
BAE77993	rpsM	3.75023	3.61569	3.70321	3.54842	3.69778	3.69652	3.59977	3.6647	3.73146	3.71669	3.56291
BAE76709	ypeC	1.75756	1.93059	1.5458	1.58285	1.593	1.39127	1.53642	1.53999	1.71705	1.95944	1.86924
BAA35820	csgE	0.525644	1.41978	-0.202916	0.948189	0.93332	0.653013	1.37901	1.13292	1.26174	1.21038	1.5662
BAE77691	yibT	2.73866	2.97045	2.70727	3.02224	2.85349	2.78538	2.81791	2.74175	2.72602	2.97532	2.98258
BAA35835	ymdB	1.47044	1.81782	1.83007	1.90017	1.73883	1.84487	1.88308	1.81918	1.81627	1.69918	1.94482
BAE77297	accC	2.95152	2.7694	2.92219	2.95478	3.00001	2.93924	2.96747	2.99146	2.95903	3.01946	2.87907
BAE77693	mtlD	2.12304	2.26403	2.17282	2.33054	2.35823	2.36328	2.33072	2.244	2.35735	2.24627	2.27847
BAE76750	nadB	1.87996	1.8689	2.00354	2.05346	2.13382	2.98925	2.10461	1.94416	2.03394	2.25996	1.8691
BAA36102	rssA	1.98401	2.1264	2.02746	2.14178	1.97264	2.11131	2.0857	2.10955	2.07063	1.95685	2.1204
BAE76629	yeiB	1.82268	1.56283	1.73603	1.5073	1.51211	1.22864	1.46418	1.70449	1.6319	1.5026	1.65399
BAA15659	edd	1.4642	1.7046	1.91912	2.00025	1.99228	2.05055	2.0241	1.81531	1.91986	1.95521	1.97335
BAB96731	hemL	2.7308	2.54968	2.76148	2.63065	2.49745	2.61029	2.60602	2.72734	2.62787	2.84732	2.6293
BAA15484	rpmI	3.4231	3.19732	3.1124	2.92003	3.04265	2.99495	3.00287	3.17421	3.09503	3.04	3.01959
BAA16103	nuoN	2.67925	2.59104	2.76857	2.49531	2.53467	2.51385	2.60168	2.60516	2.59845	2.57751	2.5461
BAE76839	cysH	2.87918	2.67945	2.92631	2.8084	3.19064	3.0315	2.96662	2.95549	2.9317	3.14761	2.84146
BAA16242	yfdE	0.715432	0.978154	0.755509	1.01966	0.680881	0.762678	0.725366	0.433932	0.492943	0.932133	0.910536
BAA15086	ansP	1.49605	1.29907	1.31154	1.22043	1.58107	1.52169	1.41667	1.25483	1.46374	1.50611	1.1116
BAE76300	purE	2.69837	2.59808	2.90098	2.65602	2.76142	2.84437	2.74504	2.75065	2.83558	2.74619	2.67077
BAE77855	gntR	2.21079	2.02813	2.12969	2.09369	2.11983	2.01983	2.01465	2.22396	1.99493	1.99457	2.05586
BAE77523	ilvC	3.43294	3.50925	3.78118	3.55588	3.87771	3.83637	3.72557	3.88388	3.72892	3.61684	3.57416
BAA35389	sdhD	2.12423	2.12442	2.53088	1.99906	2.16372	2.35617	2.24242	2.13698	2.31618	2.16567	2.04363
BAE77021	yggN	1.50308	1.62035	1.31988	1.4549	1.5193	1.41747	1.43809	1.31665	1.56167	1.41254	1.53026
BAA15996	ada	1.39705	1.64856	1.25332	1.53096	1.46936	1.42873	1.5103	1.56312	1.31461	1.31457	1.56107
BAB96648	fruR	2.19577	2.13436	2.41864	2.36814	2.33588	2.32779	2.32277	2.47391	2.44017	2.30155	2.393
BAE76876	fucU	1.85334	1.94108	1.72665	1.87665	1.866	1.96756	1.85699	1.78785	1.67494	2.03177	1.82946
BAE77847	yrhB	1.36799	1.56292	1.16073	1.11311	1.29851	0.95584	1.3673	1.13182	1.15051	1.19985	1.35441
BAB96740	yaeH	2.86428	2.88533	2.625	2.77242	2.68616	2.66203	2.72629	2.69358	2.62439	2.84856	2.7788
BAE77974	rplB	3.53577	3.32071	3.64756	3.54369	3.71379	3.65069	3.60485	3.59971	3.68125	3.65969	3.49542
BAE76212	cyoA	3.22569	3.44461	3.73043	3.61611	3.63794	3.83285	3.67301	3.41717	3.74972	3.70613	3.62515
BAA15369	uidR	2.08547	1.81378	2.00849	1.87212	1.8952	1.85363	1.91315	2.09312	1.85103	1.82458	1.8006
BAE78243	pyrI	2.38441	3.09559	3.52105	3.2704	3.20541	3.39795	3.27901	3.51563	3.27337	3.18542	3.25286
BAA35328	glnS	2.69526	2.64264	2.7097	2.67623	2.71007	2.88101	2.71626	2.75221	2.92959	2.76114	2.65873
BAE77295	yhdH	1.46905	1.70118	1.77013	1.89556	1.72909	1.71468	1.81533	1.74285	1.63591	1.72867	1.9762
BAA18882	ydeH	1.56097	1.92059	1.80364	2.12137	1.57279	1.73972	2.03074	1.94702	2.03872	1.97435	1.97769
BAA35321	nagB	2.11966	2.14531	2.07686	2.07059	2.24787	2.33732	2.20378	1.9382	2.2697	2.33293	2.0113
BAA15987	yejE	1.39652	0.993206	1.10488	1.12415	0.834963	0.779372	1.09306	1.24079	0.946452	0.894737	1.13358
BAA15620	yeaB	1.87729	2.00409	1.98329	2.06066	1.93437	1.86095	2.00014	2.032	1.94093	1.85061	2.01031
BAA35237	uspG	2.5388	2.45762	2.19265	2.47638	2.11418	2.48761	2.39666	2.22361	2.22123	2.44648	2.42821
BAE78236	nrdG	0.963858	1.29193	1.34394	1.04366	0.864828	1.0877	1.03881	0.932007	1.43978	1.22783	1.13384
BAE76309	sfmD	0.414262	0.765371	0.652236	0.493794	0.624784	0.759869	0.680362	0.40128	0.663478	0.757453	0.472831
BAB96744	rpsB	3.70165	3.56291	3.70739	3.70479	3.82255	3.77186	3.75842	3.73423	3.6857	3.71551	3.66063
BAB96588	yaaH	1.80412	1.49759	1.20261	1.06952	1.126	1.19278	0.947042	1.41894	1.21741	1.16755	1.19091
BAE76214	yajG	2.60755	2.56561	2.89323	2.61402	2.73794	2.92402	2.69042	2.78375	2.93183	2.69704	2.63833
BAA15021	ydbC	1.24379	1.36394	1.20942	1.4397	1.20845	1.31527	1.38712	1.32276	1.18087	1.25338	1.56589
BAE77836	livH	1.76676	1.33481	2.02277	1.69799	1.8536	1.76096	1.74168	1.84514	1.81939	1.82092	1.58454
BAE76462	yneK	0.338839	1.06424	0.821906	0.711899	0.759294	0.846928	0.910155	0.507325	0.9419	0.898343	0.7547
BAA35501	ybiT	2.35987	2.2911	2.45493	2.48602	2.39951	2.6419	2.44644	2.53491	2.59362	2.63485	2.44345
BAB96715	yadM	0.307363	1.13832	1.12397	1.02506	1.07666	1.20986	1.25561	0.78233	0.998043	1.18511	0.85559
BAA15454	sufB	1.41336	1.97871	1.69099	2.08191	1.63299	1.83026	2.05485	1.94817	1.44723	1.71079	1.89195
BAB96713	yadK	0.346031	1.02369	0.651765	0.434598	0.879151	0.716462	0.734872	0.336262	0.79255	0.937767	0.672909
BAE76832	ygbT	0.929371	1.59746	1.67463	1.32072	1.70479	1.6026	1.67374	1.18183	1.48118	1.47987	1.30133
BAE76188	secD	2.49197	2.44329	2.63768	2.53742	2.66507	2.64222	2.56743	2.66371	2.71164	2.54518	2.53712
BAE77761	bcsA	0.910434	0.929725	1.06237	0.787008	0.9982	0.808344	0.883424	0.762813	0.813184	0.943586	0.831234
BAE77194	yraN	1.53734	1.35663	1.29603	1.40682	1.33116	1.19417	1.23647	1.44719	1.33556	1.21907	1.45595
BAA16239	emrK	0.50184	0.744815	0.517663	0.75842	0.763446	0.683079	0.681489	0.203585	0.601316	0.72524	0.539562
BAA15397	pdxY	1.77883	1.57123	1.90058	1.92128	1.90444	1.85114	1.88995	1.83239	1.92047	1.9215	1.90906
BAA15222	marB	1.1373	0.923501	0.763386	1.14558	0.507849	0.298207	0.570289	1.27891	0.897489	0.906771	0.861981
BAE77338	nusG	3.00114	2.93243	2.99204	2.99456	3.11729	2.99946	3.05085	3.05576	3.05796	3.24571	2.95592
BAE77311	yhdY	0.465724	0.936458	1.19149	1.1976	1.3853	1.23888	1.17187	1.27596	1.10105	1.2807	1.10649
BAE77188	yraH	1.10674	1.41073	1.49236	1.20534	1.40593	1.43646	1.48029	1.01847	1.44178	1.61636	1.13288
BAE76977	serA	3.43097	3.44456	3.51984	3.48674	3.54671	3.38264	3.45566	3.50096	3.5367	3.41923	3.47354
BAA35853	yceA	2.27784	2.2302	2.43383	2.29482	2.28142	2.51019	2.33536	2.48338	2.39334	2.48984	2.27753
BAA14841	fabI	3.43399	3.27228	3.128	3.1654	3.03862	3.28566	3.20287	3.24482	3.39803	3.46196	3.19914
BAA14827	cysB	2.38214	2.34034	2.64062	2.48368	2.54327	2.67853	2.48574	2.55486	2.54966	2.5145	2.43287
BAE76256	gsk	2.06288	1.96626	2.11799	2.0833	2.18599	2.26909	2.10052	2.1625	2.30939	2.18944	2.05683
BAE76225	ybaE	0.784287	0.344501	0.390507	0.215731	0.308447	0.353994	0.149253	0.733757	0.291004	0.303822	0.367917
BAE77225	greA	2.65817	2.39165	2.16728	2.17531	2.27507	2.13321	2.21708	2.25959	2.27851	2.45627	2.19217
BAA15457	sufS	1.58453	2.08611	1.82631	2.18055	1.75893	1.92873	2.11459	2.03513	1.634	1.81897	2.00201
BAE77971	rplC	3.66422	3.48168	3.84988	3.77789	3.92856	3.90556	3.82636	3.78892	3.88107	3.85765	3.70076
BAA15651	ptrB	1.55418	1.6716	1.58601	1.68649	1.59979	1.67104	1.67108	1.65938	1.62933	1.55542	1.63953
BAE78260	yjgR	1.71052	2.12955	2.14442	2.36299	2.22147	2.21006	2.29405	2.20432	2.13117	2.18714	2.27506
BAE77908	yhfZ	1.16223	1.03606	1.43706	1.39087	1.4181	1.46507	1.37896	1.48825	1.38991	1.3813	1.31529
BAE77396	cpxP	2.74078	2.81547	2.35777	2.65174	2.44315	2.46536	2.56058	2.3293	2.61072	2.78796	2.55169
BAE77978	rplP	3.30122	3.15672	3.56523	3.43701	3.6107	3.57156	3.50145	3.50508	3.6003	3.56149	3.41583
BAE77496	hemC	2.39951	2.34942	2.41897	2.47166	2.50437	2.44831	2.44269	2.50535	2.4044	2.33924	2.43452
BAE77976	rplV	3.1897	3.02838	3.55805	3.43383	3.6209	3.61652	3.51353	3.52577	3.58087	3.52614	3.37885
BAA35656	ihfB	3.43635	3.37125	3.00003	2.86157	2.70082	2.97103	2.78815	2.91285	3.052	3.16445	2.92052
BAE77977	rpsC	3.54239	3.33813	3.62868	3.51442	3.6811	3.65592	3.58332	3.59901	3.66507	3.61441	3.46317
BAE76479	ynfD	2.2	2.1723	1.70634	1.64809	1.36257	1.85341	1.56634	1.57256	1.75461	1.40753	1.73582
BAE76902	ygdR	2.18722	2.08062	1.70663	1.5817	1.47947	1.33598	1.53817	1.7894	1.64053	1.66536	1.5894
BAE77027	nupG	1.36673	2.06823	1.8876	2.07597	2.29278	2.09834	2.16245	2.17787	1.91983	2.22986	2.11439
BAE76169	aroL	2.86403	2.61524	2.94215	2.79077	2.83982	2.94843	2.69446	2.82976	2.76964	2.85069	2.69878
BAA35457	rhlE	1.80895	1.68547	1.93657	1.96189	1.86538	1.99419	1.79715	1.89127	2.07801	1.93998	1.92927
BAE76182	proY	1.66543	1.49705	1.72437	1.50085	1.70237	1.6443	1.54533	1.62099	1.74115	1.59035	1.56368
BAE76529	yeaO	2.04853	2.16906	2.11407	2.18822	1.85883	2.04398	2.08047	2.10199	2.15485	1.99459	2.09991
BAE77354	argE	2.52241	2.34873	2.74576	2.56559	2.42548	2.63779	2.52286	2.6755	2.50228	2.79342	2.43834
BAA35393	sucB	2.93273	2.93685	3.59058	3.17957	3.28512	3.50076	3.37701	3.31333	3.42875	3.32307	3.20296
BAE77695	yibI	1.10861	1.2735	0.606393	0.95568	1.02513	0.874277	0.830518	0.669372	0.85142	1.084	0.951833
BAA15853	hisB	2.13614	2.23889	2.63068	2.76469	2.57231	2.73151	2.63506	2.71523	2.6302	2.87829	2.5412
BAA15060	ydcM	1.85845	1.93547	1.73179	1.80212	1.58676	1.7352	1.76276	1.78863	1.76539	1.62861	1.75563
BAE76831	ygbF	1.73546	1.82743	1.73436	1.61711	1.84635	1.58035	1.86425	1.55602	1.65289	1.64247	1.56599
BAA15854	hisH	1.71463	1.69301	2.27359	2.32152	2.11113	2.2322	2.24986	2.24579	2.22605	2.47946	2.06647
BAA35701	ycbW	1.57052	1.8989	2.05376	2.02038	1.76444	2.03246	1.96227	2.02754	1.93002	1.91117	2.05998
BAA14792	trpA	2.55398	2.44724	2.78932	2.61932	2.69521	2.80473	2.59031	2.63371	2.62693	2.75779	2.59205
BAE76299	purK	2.5548	2.45899	2.88966	2.62284	2.76585	2.79991	2.68341	2.69021	2.79325	2.73077	2.63431
BAA36066	ispE	2.77143	2.62503	2.7292	2.57848	2.59714	2.75087	2.58977	2.62877	2.77498	2.67689	2.6413
BAA77870	proS	2.63091	2.52482	2.71102	2.66924	2.85045	2.79332	2.6943	2.83452	2.73782	2.82496	2.6692
BAB96723	sfsA	1.56943	1.73404	1.81147	1.86117	1.84609	1.75543	1.83139	1.80758	1.73753	1.73175	1.98645
BAE77300	prmA	2.21097	2.02201	2.16157	2.22042	2.371	2.24678	2.22368	2.16554	2.24807	2.24686	2.16846
BAA15072	ydcV	0.845512	1.03644	1.11829	1.02796	0.993466	1.22206	1.16764	1.08658	0.940191	1.02848	1.08081
BAE77942	slyD	3.34968	3.2065	3.25892	3.15902	3.23734	3.11323	3.17541	3.2477	3.33223	3.32329	3.20582
BAE78244	pyrB	2.34734	3.09048	3.50431	3.30085	3.26662	3.46727	3.31349	3.48716	3.26111	3.17818	3.27002
BAE77392	cdh	1.87127	1.5943	1.82782	1.59396	1.85149	1.72864	1.68246	1.71618	1.80829	1.74874	1.61934
BAA16404	yfgB	2.38948	2.29465	2.21287	2.2695	2.34315	2.20578	2.24193	2.27991	2.27091	2.50387	2.24511
BAE76807	hypE	1.52722	1.62106	1.31586	1.44284	1.49184	1.30551	1.50734	1.28627	1.42443	1.30087	1.45505
BAE77511	rffD	1.86142	1.62576	1.97013	1.80699	2.01417	1.85739	1.88558	2.02497	1.91435	1.98985	1.87516
BAE76907	lysA	2.1001	1.92362	2.07226	2.04866	2.18933	2.15803	2.12151	2.06298	2.11239	2.08164	2.04776
BAE76395	trpL	2.44938	2.59474	1.77633	1.47721	1.61763	1.37451	1.76364	1.94404	2.13221	1.79119	1.88629
BAA35672	ycbK	2.86906	3.04388	2.83688	3.00004	2.90742	2.80782	2.88314	2.9855	2.98447	2.90233	2.99773
BAA16288	cysK	3.75959	3.5477	3.68011	3.6891	3.78633	3.98321	3.78655	3.71508	3.74825	3.72009	3.58297
BAA35378	nei	1.50864	1.46297	1.75989	1.65714	1.67717	1.86494	1.61481	1.77238	1.83606	1.53961	1.59211
BAA15684	cutC	2.30367	2.34363	1.74731	1.82701	1.7573	1.66099	1.79815	1.81038	1.78543	1.87097	1.77168
BAE77694	mtlA	1.70992	1.77299	1.81419	1.81507	1.83798	1.83509	1.82437	1.77432	1.86369	1.8043	1.85817
BAA16243	yfdV	0.0295765	0.924454	0.737141	1.00448	0.561454	0.45595	0.676432	0.18038	0.384021	0.689855	0.838496
BAE76623	yeiT	0.794606	1.0823	1.34749	1.02556	1.09772	1.03444	1.11792	0.596375	1.17688	0.913803	0.959994
BAE77839	livF	2.20356	1.82741	2.44284	2.27575	2.323	2.26342	2.28585	2.36465	2.23695	2.38015	2.24401
BAA15639	proQ	2.98856	2.92161	3.08009	3.00872	3.02234	2.9606	3.0178	3.12147	3.10696	3.01848	2.93907
BAE77708	yiaU	1.05651	1.56508	1.57777	1.50464	1.68829	1.56987	1.58516	1.43367	1.65635	1.58278	1.4951
BAE76618	yohJ	1.01584	1.28366	0.866357	0.88354	0.852747	0.849303	0.889909	0.877333	0.971464	1.04822	1.08018
BAA16411	sseA	1.90788	2.1782	2.39364	2.39012	2.26549	2.28531	2.33261	2.21755	2.15781	2.27694	2.28198
BAE77654	yicR	2.70342	2.32231	2.49208	2.18975	2.47189	2.35767	2.26796	2.40931	2.48648	2.2797	2.23803
BAB96714	yadL	0.00897804	1.11964	1.1073	0.876947	1.07641	1.23124	1.18855	0.808792	1.04591	1.24968	0.729267
BAE76408	intR	0.77798	0.988581	0.986507	0.822297	0.956759	1.10998	0.925332	0.856267	1.08861	1.07507	0.74594
BAE76995	yggP	0.435785	1.03628	0.933701	1.11101	1.18954	1.15014	1.13625	0.957251	1.06397	1.30258	1.05726
BAA15586	yeaI	0.243038	0.579391	0.0791418	0.404986	-0.08835	0.114582	0.358689	0.0775728	0.496926	0.221892	0.410003
BAA15829	yeeA	1.60018	1.66286	1.52157	1.74122	1.67116	1.58295	1.71233	1.51943	1.607	1.63381	1.72445
BAA35329	ybfM	0.762127	0.379045	0.639525	0.466038	0.432442	0.609693	0.550692	0.479245	0.638094	0.66458	0.503555
BAE77972	rplD	3.44316	3.23616	3.61056	3.50057	3.67147	3.67481	3.58629	3.58138	3.63307	3.59401	3.44637
BAE78079	gltP	1.86461	1.57482	1.12231	1.19842	1.66095	1.11797	1.50179	1.51803	1.41557	1.53006	1.3631
BAA14840	rnb	2.8258	2.77851	2.82496	2.95828	3.03162	3.05657	2.9446	2.94532	3.12492	2.96294	2.88078
BAE76032	nhaR	1.66182	1.90506	1.89249	1.91653	1.81153	1.66346	1.76363	1.73296	1.74744	1.56436	1.94204
BAA16121	nuoB	2.7372	2.6851	3.04771	2.82178	2.82575	2.91036	2.93067	2.97493	2.87337	2.8276	2.76237
BAA35408	ybgF	2.75634	2.71008	3.04813	2.79214	2.85075	2.93599	2.86292	3.0017	3.00358	2.91257	2.83366
BAE78201	rpsF	3.92496	3.59707	3.67647	3.52603	3.68643	3.5269	3.59124	3.63594	3.72581	3.73144	3.54769
BAE76036	caiF	2.02326	1.95398	2.27124	2.19363	2.26478	2.36232	2.24804	2.11452	2.15323	2.36488	2.06385
BAB96692	acnB	2.84556	2.92746	3.45782	2.96685	3.06265	3.21363	3.07113	3.15339	3.16087	2.99327	3.02672
BAA35729	yccT	1.27106	1.37418	1.29659	1.2643	1.06455	1.34511	1.2862	1.37181	1.15946	1.06786	1.27496
BAE76743	rnc	2.59814	2.38446	2.43767	2.42278	2.32506	2.334	2.41733	2.5696	2.31245	2.43316	2.42275
BAE77863	glgA	2.41974	2.55242	2.4514	2.5628	2.52573	2.59215	2.53805	2.46832	2.4034	2.52172	2.54669
BAA16249	yfdZ	1.83017	2.06103	2.02915	1.97031	1.91556	1.77416	1.91972	1.97893	1.96751	2.00081	2.04128
BAA16130	yfbV	2.57244	2.64192	2.33245	2.28689	2.23651	2.06334	2.26171	2.34655	2.30438	2.41017	2.35158
BAA15652	yebE	1.7071	1.87088	1.81815	2.03206	1.96945	1.93133	1.95601	1.78913	2.04565	2.14823	1.93056
BAA14794	trpC	2.09213	2.06202	2.46519	2.34264	2.43021	2.46705	2.32554	2.37361	2.29443	2.48211	2.27888
BAE77633	nlpA	2.60389	2.45874	2.68167	2.66599	2.89996	3.10152	2.81827	2.78597	2.79995	2.77441	2.575
BAB96667	mutT	1.28752	1.14822	1.69373	1.40498	1.53019	1.56485	1.41782	1.6015	1.5165	1.5642	1.50996
BAE76869	sdaB	1.54394	1.12129	0.907515	0.932694	0.928958	0.868359	1.05052	1.15806	0.721636	0.969811	0.971679
BAA35857	yceP	2.67876	2.68157	1.81336	2.16739	2.03794	1.97355	2.1864	2.0858	1.94747	2.16326	2.28033
BAE78241	mgtA	2.18407	1.75294	2.00409	2.07531	1.73768	1.57416	1.99861	2.18963	1.56091	2.22428	2.05618
BAE78173	hfq	3.24617	3.04579	3.00114	2.92078	2.84903	2.81919	2.87496	3.04854	2.93298	2.96712	2.94299
BAE77743	yiaD	1.83278	1.65752	1.8344	1.76779	1.74905	1.76018	1.8579	1.39906	2.09916	1.83763	1.59799
BAA15599	rnd	1.90596	1.79059	1.86011	1.81141	1.86865	1.69627	1.83457	1.91311	1.86213	1.81417	1.74235
BAE77629	yicO	0.490136	0.646246	0.052559	0.141443	0.417395	0.236749	0.279755	-0.0132447	0.163307	0.105641	0.405153
BAE77991	secY	3.43813	3.30622	3.66958	3.52565	3.71266	3.64217	3.5983	3.56489	3.61145	3.63901	3.5245
BAA35437	uvrB	1.8959	2.25337	2.2543	2.29202	2.32007	2.32814	2.29484	2.25904	2.27648	2.34636	2.27632
BAE76232	tesB	1.91868	2.01365	1.57725	1.90531	1.77013	1.63679	1.85612	1.8403	1.76203	1.85633	1.87567
BAE76240	ybaJ	2.03227	2.13988	1.72468	1.81933	1.79722	1.88819	1.8044	1.70959	1.68159	1.70237	1.91599
BAE77973	rplW	3.06355	2.92597	3.49594	3.36005	3.50661	3.60387	3.41489	3.43629	3.53572	3.43436	3.3187
BAE78257	pepA	2.74901	2.72708	2.66359	2.81837	2.76181	2.65716	2.70326	2.7918	2.66341	2.73003	2.79103
BAE77801	pitA	2.35115	2.17571	2.17014	2.34796	2.51059	2.15775	2.33783	2.19678	2.35849	2.33329	2.25589
BAE78208	fklB	2.81079	2.68927	2.7826	2.87136	2.91987	2.83764	2.85768	2.87483	2.83684	2.96864	2.85151
BAE76435	ydcK	1.54599	1.43889	1.23437	1.699	1.1646	1.3763	1.42739	1.71851	1.31299	1.26627	1.70466
BAE76754	yfiQ	1.74298	1.94853	1.9435	2.04174	1.99202	1.90955	2.01941	1.92371	1.7511	1.78147	1.94639
BAA35819	csgF	0.532239	1.33979	-0.382503	0.76383	0.688566	0.52911	1.00714	0.966912	1.04292	1.17853	1.33741
BAE76497	ydhW	0.98514	1.30257	1.13388	1.04104	1.22109	1.15199	1.14145	0.978355	1.45929	1.08704	1.0035
BAB96712	yadC	0.665371	1.01968	0.738181	0.718048	0.833648	0.821609	0.960521	0.703154	0.968771	1.05602	0.630489
BAA16127	yfbQ	2.35853	2.158	2.52625	2.21989	2.4126	2.29544	2.27663	2.38013	2.30888	2.32958	2.18243
BAE77677	yibD	0.721725	0.926588	0.617483	0.808797	0.372943	0.669104	0.716105	0.759552	0.785462	0.943479	0.687485
BAE77351	argH	2.43926	2.39631	2.91313	2.69759	2.83232	2.73887	2.74008	2.7253	2.73595	2.7745	2.61151
BAA15070	ydcT	0.970322	1.11629	1.23064	1.32211	1.20199	1.33486	1.33265	1.34331	1.16273	1.0957	1.26252
BAA16549	luxS	3.20144	3.19083	2.731	2.88872	2.76859	2.70949	2.83869	2.9338	2.8061	2.95383	2.9269
BAE77832	rpoH	2.85844	2.90093	2.58756	2.67522	2.68343	2.63637	2.70032	2.66879	2.68689	2.75098	2.70204
BAA35953	purB	2.75617	2.71259	2.90377	2.8149	2.80044	2.99818	2.85597	2.90775	2.99145	3.04739	2.81604
BAA16294	yfeS	1.43562	1.60268	1.44484	1.56381	1.59502	1.57402	1.65363	1.29305	1.58693	1.56977	1.56147
BAE77347	yijD	2.44122	2.24659	2.07471	1.93785	2.09875	1.7674	1.92828	2.09477	2.15903	2.01876	1.9699
BAA15516	chbR	1.07645	1.36032	1.2149	1.32996	1.15065	1.2535	1.26321	1.14682	1.29439	1.31673	1.26014
BAE78071	acs	1.80057	1.98574	3.01302	2.4432	2.56708	2.80729	2.75089	2.4504	2.38313	2.33904	2.37006
BAE78152	sugE	2.11172	2.11463	1.78888	1.7877	1.73889	1.66883	1.77225	1.77684	1.79616	1.97052	1.8975
BAA35483	glnH	2.9039	0.459671	0.238407	0.12157	-0.113073	-0.584456	-0.234621	0.668728	-0.397552	-0.0486547	0.3605
BAE76195	ribE	2.5861	2.51763	2.93826	2.75815	2.94181	3.07379	2.80961	2.8928	2.9805	2.8709	2.78003
BAE77995	rpsD	3.67386	3.59766	4.03484	3.93549	4.1242	4.16368	3.98959	3.96244	4.00369	4.00368	3.83333
BAE77108	bacA	2.02698	1.99903	2.17212	2.04129	2.17726	1.95397	2.09095	2.22449	2.121	2.17814	2.07534
BAE77510	rffG	1.8827	1.67606	1.92668	1.81056	1.98505	1.86802	1.90611	1.97212	1.86023	1.94386	1.86762
BAE77439	glnA	3.29484	3.14533	3.58966	3.38435	3.53642	3.62006	3.41536	3.18788	3.54679	3.50762	3.3192
BAB96585	yaaJ	1.27517	1.17043	0.978365	1.04263	0.988742	1.00984	1.0456	0.955075	1.01129	1.02021	1.13592
BAA15986	yejB	1.38954	0.85755	0.830156	0.857205	0.653977	0.615949	0.866298	1.20444	0.596459	0.764261	0.917612
BAE76628	galS	0.90175	0.74995	1.07592	0.956802	1.38045	0.942927	1.09129	1.08976	0.753179	0.755242	0.739332
BAA15088	ydcD	0.596064	1.31446	1.35385	1.34559	1.2507	1.42596	1.39401	1.09282	1.4465	1.38185	1.15862
BAE77479	recQ	2.03551	1.972	2.17149	2.10943	2.25033	2.16156	2.18427	2.13252	2.12031	2.12396	2.07545
BAA16572	gudD	0.958774	1.15799	1.04901	1.2431	1.16397	1.07204	1.18808	0.962999	1.09809	1.07447	1.17082
BAA15857	hisF	2.05414	2.08321	2.38756	2.48852	2.28672	2.39658	2.40279	2.51814	2.41096	2.68388	2.34631
BAA36100	purU	2.39306	2.25167	2.68369	2.42375	2.46693	2.64021	2.51062	2.6074	2.77207	2.62371	2.40567
BAE77234	yrbA	2.45251	2.17666	2.59597	2.60407	2.5615	2.4027	2.52194	2.71297	2.42647	2.64594	2.60221
BAE77877	gntY	3.07304	2.75078	2.77517	2.78914	2.88462	2.78306	2.72543	2.94967	2.69712	2.8373	2.8095
BAE76244	kefA	1.90111	1.74386	1.74944	1.79907	1.80312	1.87722	1.77892	1.86245	1.86637	1.94625	1.79534
BAE77101	yqiI	0.570858	0.948382	0.661285	0.476058	0.453549	0.539968	0.731625	0.472232	0.758071	0.776325	0.281613
BAA16106	nuoL	2.05619	2.01007	2.54688	2.1616	2.20151	2.2306	2.2436	2.25282	2.27186	2.14066	2.22013
BAE77655	rpmB	4.12019	3.80229	3.72451	3.48779	3.63776	3.56932	3.52274	3.6717	3.75715	3.75335	3.55441
BAA16412	sseB	2.06465	2.01795	2.15905	2.03382	2.26161	2.1557	2.12963	2.21531	2.02281	2.2778	2.07166
BAA16298	cysU	2.31738	2.19041	2.39661	2.25269	2.24749	2.23657	2.30436	2.3271	2.3089	2.24636	2.29108
BAA15400	ydhA	1.52823	1.58231	1.2693	1.37628	1.35244	1.29526	1.27393	1.4746	1.49145	1.63096	1.4547
BAA15472	ydiA	2.16344	2.23266	2.10858	2.24549	2.18251	2.18916	2.2132	2.20719	2.1017	2.19642	2.1745
BAE76150	hemB	2.50183	2.48396	2.64383	2.64166	2.56093	2.76363	2.61951	2.70709	2.757	2.74623	2.66457
BAE78066	yjcD	1.81638	1.97491	2.04538	1.92301	1.94156	1.92549	1.80973	1.95428	1.90108	2.0655	1.95
BAE76890	ptr	1.73022	1.93883	1.76173	1.80969	1.84686	1.67479	1.82189	1.72192	1.81723	1.82983	1.81806
BAE78255	valS	2.64469	2.61721	2.69762	2.70993	2.81233	2.70272	2.69686	2.78051	2.72306	2.76467	2.69065
BAE76985	ygfI	1.12083	1.24186	1.12816	1.36668	1.27242	1.14448	1.34895	1.26273	1.10404	1.27641	1.15026
BAE77860	glgB	2.50333	2.67898	2.72808	2.79925	2.79652	2.87502	2.81064	2.70884	2.62763	2.76629	2.75273
BAE76508	ydiY	1.98843	1.34625	1.45868	1.44326	1.34471	1.26983	1.37131	1.77227	1.8789	1.66027	1.50916
BAA35404	tolR	1.89551	1.87607	2.23714	2.14397	2.18202	2.31412	2.18744	2.1813	2.30825	2.11835	2.1266
BAA15316	clcB	1.24651	1.27334	1.06996	1.13842	1.15547	1.04934	1.09415	1.05215	1.19105	1.08629	1.0961
BAE77952	tufA	2.99524	2.87073	3.18331	3.03822	3.1645	3.19169	3.05666	3.0768	3.1932	3.16442	2.97186
BAA77891	fadE	1.62961	1.93517	1.81352	2.04095	1.88609	1.90708	2.07038	1.90145	1.56144	2.13909	2.15266
BAE77652	dut	2.56198	2.53892	2.6383	2.68786	2.85822	2.7298	2.71613	2.68088	2.72967	2.77391	2.64839
BAA35409	nadA	2.25038	2.31566	2.70762	2.50816	2.55536	3.46281	2.58855	2.62224	2.63788	2.72208	2.45243
BAA35655	rpsA	3.45876	3.34604	3.7193	3.60503	3.70523	3.79033	3.65316	3.64372	3.70987	3.71968	3.56948
BAB96589	dnaK	3.15295	3.03063	3.2869	3.17148	3.33252	3.29958	3.24605	3.20803	3.33321	3.20661	3.09624
BAE77090	nudF	2.2012	2.35551	2.35057	2.56597	2.55791	2.46142	2.53208	2.4424	2.45166	2.36109	2.4677
BAA35431	ybhE	2.43494	2.47345	2.4857	2.77198	2.4648	2.73036	2.61049	2.63555	2.54928	2.57278	2.68447
BAE76555	yedP	1.77449	1.50224	1.33169	1.54986	1.40925	1.26655	1.36133	1.46062	1.36833	1.33057	1.43446
BAE76617	dusC	1.73665	1.62063	1.83764	1.80873	1.95149	1.80093	1.80266	1.8049	1.81102	1.89168	1.69951
BAA15647	yebT	1.76309	1.83966	1.80002	1.85544	1.80157	1.72754	1.81918	1.82293	1.75016	1.70856	1.80701
BAA15679	yecE	1.49473	1.66336	1.34654	1.57241	1.43495	1.38686	1.56026	1.50067	1.51274	1.48736	1.47145
BAE76422	feaR	1.46554	1.40962	1.73166	1.59578	1.46298	1.69915	1.63379	1.77574	1.65324	1.56109	1.52685
BAE77951	fusA	3.76742	3.66073	3.99852	3.84793	4.00072	3.98028	3.92279	3.93853	3.99152	4.0188	3.80123
BAA77885	rnhA	2.25615	2.07486	2.17363	2.07073	2.08217	2.09464	2.01119	2.17314	2.23918	2.15804	2.09392
BAA16056	inaA	1.92187	1.72908	2.00239	2.16783	1.94423	1.83928	1.97059	2.20921	1.89328	1.88022	2.15031
BAA16183	yfcA	1.79283	1.68836	1.87074	1.80337	1.88717	1.69774	1.86245	1.93002	1.8165	1.72231	1.79527
BAA16545	ygaH	2.10647	0.831662	0.551915	0.332051	0.321954	0.622906	0.233879	-0.649043	0.774063	0.0262926	0.525571
BAA15455	sufC	1.34997	1.87726	1.54513	1.99945	1.53624	1.7682	1.92298	1.84926	1.39569	1.65931	1.74885
BAE76961	ygfX	2.08953	1.94582	2.17258	1.9467	1.99787	1.96458	2.00077	2.0024	2.00272	1.9383	1.97446
BAE77746	tag	1.92029	2.10407	2.28056	2.19072	2.13948	2.12663	2.10657	2.11118	2.08714	2.10281	2.12426
BAA15311	ynfE	0.520272	0.733423	0.725257	0.749654	0.344937	0.710885	0.752323	0.616242	0.934709	0.635819	0.702863
BAA35635	ycaN	1.37471	1.52855	1.44142	1.37184	1.36797	1.42374	1.34417	1.42957	1.43944	1.52434	1.33611
BAE77368	katG	2.56859	2.39529	2.55983	2.52991	2.56114	2.4341	2.47926	2.78355	2.59454	2.63568	2.51991
BAE77111	ygiP	0.922564	1.09523	1.05127	0.818865	1.02454	1.04033	1.10329	0.719564	1.36533	1.01066	0.931996
BAA15456	sufD	1.50445	2.11516	1.80906	2.24099	1.81383	2.04618	2.19007	2.0902	1.67281	1.86018	2.0293
BAA16115	nuoC	2.6065	2.59683	3.07768	2.84173	2.8558	2.90931	2.91509	2.92769	2.91	2.73646	2.78648
BAA15803	yeeN	2.61164	2.51961	2.75178	2.48378	2.69221	2.67968	2.56393	2.69625	2.73874	2.57698	2.44323
BAA16413	pepB	2.11822	2.1576	2.41269	2.43862	2.58247	2.47618	2.43966	2.40118	2.22587	2.5394	2.40879
BAE77418	fdhE	2.00734	1.97039	2.17959	2.08289	2.12109	2.00812	2.0756	2.08812	2.17007	2.04473	2.06402
BAE76539	yobG	2.01653	1.85964	1.96817	1.63206	1.92113	1.54016	1.65253	1.97328	1.70005	1.57084	1.72805
BAE77232	sfsB	1.65589	1.79334	1.50674	1.84009	1.81667	1.54351	1.78992	1.69013	1.55825	1.86477	1.63804
BAA35903	fabF	2.82688	2.67132	2.89059	2.76012	2.71719	2.96214	2.76833	2.82356	2.7677	2.83312	2.78453
BAA15905	cpsB	0.413679	0.514244	0.283447	0.345951	0.278882	0.253228	0.424135	0.356139	0.441702	0.265356	0.474638
BAA16050	yfaL	0.840268	1.07916	1.10364	1.19068	1.13073	0.96433	1.07367	1.00715	0.948469	0.981486	1.1552
BAB96686	lpd	3.07058	3.13545	3.59908	3.39111	3.39786	3.56282	3.45783	3.42917	3.45913	3.47383	3.38514
BAA14909	ycjY	1.13195	1.41437	0.938963	1.27209	1.17749	1.27083	1.2769	1.23544	1.23974	1.0631	1.26235
BAE76753	yfiP	1.56536	1.31907	1.57609	1.32261	1.583	1.22546	1.35178	1.47046	1.52508	1.46593	1.31506
BAE77253	elbB	2.08895	1.94188	2.14359	2.15045	2.13097	2.09545	2.10025	2.27194	2.10662	2.11224	2.11824
BAE76909	ygeA	2.04457	2.28793	2.3131	2.38255	2.35785	2.162	2.29842	2.28192	2.21619	2.2962	2.35145
BAA35588	ybjE	2.12143	1.89164	2.18851	1.92252	2.01396	2.10744	1.88777	2.05104	2.16985	2.15998	1.8396
BAE77068	yqhD	1.64013	2.06129	2.1942	1.9739	1.96083	2.09022	2.03991	1.93593	2.06499	2.07547	2.15725
BAA14984	hslJ	1.86104	1.93912	1.80253	1.74326	1.68245	1.76191	1.71776	1.86259	1.99628	1.99945	1.813
BAE76406	ydaN	1.5336	1.75833	2.01399	1.92254	1.82022	2.06724	1.9012	1.90582	1.87495	1.83578	1.92122
BAA15471	pps	2.7767	2.51658	3.01681	2.6294	2.87212	2.88322	2.76193	2.81817	2.55063	2.75467	2.67149
BAE78363	prfC	2.54625	2.48389	2.59287	2.66055	2.72386	2.70528	2.69112	2.64756	2.78925	2.71766	2.60209
BAE76634	yeiE	1.73188	1.7976	1.71906	1.67777	1.61266	1.34315	1.63472	1.72191	1.60793	1.69054	1.74094
BAE77485	corA	2.37574	2.48365	2.53568	2.62867	2.71514	2.66354	2.54779	2.37481	2.52001	2.62989	2.55813
BAE77868	glpG	2.15123	2.02515	2.13069	2.15263	2.2594	2.19227	2.14202	2.16025	2.21649	2.17259	2.10843
BAE76175	mak	1.26381	1.48777	1.75623	1.84562	1.82639	2.05897	1.79722	1.62482	1.74704	1.60725	1.81447
BAE77996	rpoA	3.65132	3.52542	3.77889	3.71376	3.79222	3.72849	3.69186	3.7032	3.78329	3.78061	3.61046
BAE77025	yggX	1.90128	1.83447	2.12182	2.23144	2.27494	2.10031	2.06481	2.12879	2.02352	2.1453	2.0429
BAE77944	fkpA	2.94547	2.80207	2.79531	2.78333	2.976	2.90171	2.89548	2.87641	2.99837	2.88527	2.75551
BAE77059	yghW	1.14151	1.17881	0.838528	0.836528	0.58787	0.630803	0.916051	0.889095	-0.389558	0.743754	0.743033
BAA35924	ndh	1.73637	1.99395	1.93948	1.9365	1.824	2.14458	1.89583	1.91976	2.0531	2.07222	2.08845
BAE77296	accB	3.09379	2.93721	3.18453	3.23408	3.27951	3.29173	3.24124	3.24817	3.13551	3.23778	3.13421
BAA15638	prc	2.64671	2.5579	2.73582	2.64141	2.66214	2.59526	2.63266	2.74485	2.70138	2.61319	2.55554
BAE76547	exoX	2.23279	2.30864	2.05981	2.1792	2.12578	2.01012	2.10925	2.16037	2.09056	2.17476	2.19325
BAA14828	acnA	2.1773	2.43124	2.70095	2.61588	2.36594	2.82666	2.60487	2.56507	2.5423	2.38417	2.57232
BAB96734	yadS	1.6808	1.64636	1.72912	1.50247	1.69518	1.64303	1.51779	1.5926	1.55503	1.67835	1.49014
BAA15032	aldA	2.55973	2.60182	3.45162	3.18995	3.01179	3.37315	3.24752	3.21719	3.13443	3.15452	3.07888
BAA35730	yccU	2.441	2.48144	2.56068	2.54229	2.47198	2.54308	2.56063	2.53895	2.58307	2.54859	2.61397
BAE76451	yddM	2.19123	2.27248	2.11952	2.10521	1.97698	1.92337	2.07482	2.12137	2.06569	2.17661	2.12629
BAE76741	recO	1.90691	1.67294	1.95473	1.92082	1.73596	1.78171	1.87302	1.99477	1.78678	1.85096	1.93128
BAE77701	yibF	2.1165	1.80813	1.77826	1.91964	1.93338	1.86847	1.8497	1.80194	1.81761	1.76942	1.87997
BAA16194	sixA	2.96616	3.03023	2.82331	2.9748	2.89077	2.75427	2.92844	2.89624	2.952	2.92531	2.94597
BAE77595	gyrB	2.31216	2.276	2.4851	2.513	2.54823	2.59041	2.53457	2.4779	2.45459	2.60853	2.46426
BAE77312	yhdZ	1.05957	1.14577	1.44282	1.3948	1.5938	1.41639	1.37387	1.55185	1.37424	1.57953	1.34426
BAA15474	ydiE	1.64098	1.24796	1.10266	1.37544	1.27933	1.14524	1.32547	1.4411	1.05057	1.23147	1.07204
BAA15441	ydhT	0.81496	0.975472	0.885348	0.773089	0.718852	0.933104	0.84094	0.708932	1.00124	0.629682	0.92184
BAA14980	uspF	2.65399	2.63575	2.8057	2.64044	2.401	2.87923	2.7111	2.55885	2.61577	2.64058	2.55325
BAA16295	cysM	2.20818	2.1488	2.54232	2.55409	2.55816	2.55181	2.55755	2.51734	2.47897	2.4961	2.5673
BAA15661	yebK	1.90284	1.81778	1.99675	1.92615	1.73783	1.97829	2.00662	2.04205	1.9707	1.81337	1.8509
BAA14835	pyrF	2.25216	2.30652	2.44705	2.39259	2.35412	2.44961	2.35193	2.40304	2.51796	2.47217	2.37057
BAE76726	yfgH	0.791368	1.03701	0.869769	0.979848	1.19218	0.85215	1.01085	0.844262	1.02064	0.998833	0.903512
BAE76524	ynjI	1.08176	0.999749	1.04062	0.844707	1.00806	0.925997	0.85151	1.36476	0.676505	0.945446	0.878373
BAE77247	yhbH	2.5155	2.6284	2.36756	2.5145	2.43628	2.24296	2.44309	2.45415	2.35222	2.52135	2.57924
BAE77318	yjaH	1.91276	1.70731	1.92319	1.82274	2.02409	1.68947	1.92585	1.99045	1.86546	1.84566	1.81875
BAE77401	sodA	3.73847	3.19534	3.25724	3.4332	3.41707	3.24097	3.35188	3.56328	2.78968	3.35257	3.32081
BAE77795	yhiR	2.04695	1.99227	2.08482	1.98576	2.15646	2.04195	2.07418	2.13662	2.12909	2.12054	2.0081
BAA35893	rne	2.57306	2.60783	2.83451	2.74587	2.77716	2.88787	2.72326	2.76064	2.80681	2.74185	2.69596
BAE77767	yhjJ	1.89673	2.06711	2.08232	1.97846	2.10167	1.90089	1.93998	1.85816	2.07399	2.05739	2.01488
BAB96666	secA	2.40799	2.31049	2.68283	2.44202	2.51632	2.53962	2.48545	2.5013	2.50761	2.53875	2.44327
BAA35439	moaA	2.44014	2.56402	2.40979	2.44125	2.51906	2.49876	2.45867	2.39416	2.44808	2.49939	2.41179
BAA15658	eda	2.10649	2.26419	2.59824	2.64322	2.58669	2.60733	2.62172	2.4817	2.54379	2.60265	2.67856
BAE77228	yhbE	2.04442	1.92946	2.02191	2.05435	2.14682	2.06092	2.07567	2.01044	2.03615	2.36002	2.01957
BAE77862	glgC	2.40094	2.64363	2.69799	2.84264	2.80953	2.97893	2.81957	2.74655	2.61999	2.75188	2.7727
BAA15838	dacD	1.15267	1.21601	1.34289	1.43991	1.25622	1.24461	1.32205	1.28536	1.32608	1.23919	1.32249
BAE77987	rplR	3.1151	2.92297	3.27764	3.0711	3.24709	3.15709	3.14739	3.21434	3.2914	3.2402	3.10403
BAA16489	yfiN	1.32414	1.16116	1.07926	1.25238	1.12376	1.05538	1.17829	1.04277	1.10892	1.16057	1.21047
BAA35416	aroG	3.11267	3.07403	3.34342	3.03388	3.20135	3.25611	3.16422	3.31308	3.44765	3.20257	3.10448
BAA15384	rsxC	1.78409	1.77116	1.90842	1.84976	1.65673	1.88123	1.84103	1.91376	1.77522	2.05566	1.76653
BAE77656	rpmG	1.58103	1.44826	1.27158	1.09131	1.17144	1.22497	1.28209	1.26541	1.34713	1.40613	0.977116
BAE78235	pmbA	1.75965	1.89143	1.77073	1.91614	1.74382	1.80488	1.85669	1.80315	1.77369	1.78003	1.91149
BAA15851	hisD	2.20783	2.28397	2.53566	2.75311	2.50146	2.61808	2.59156	2.65817	2.59147	2.84616	2.5358
BAE77822	yhhQ	1.86266	2.01574	1.59795	1.83864	1.72662	1.83247	1.82125	1.55855	1.71216	1.86345	1.81351
BAE77696	yibH	0.967074	1.1242	0.733604	1.07486	0.865208	0.879256	1.06006	0.794577	0.734928	0.937278	1.03878
BAA77909	crl	3.3009	3.17386	3.18486	3.05288	3.13354	3.13714	3.10578	3.10601	3.14487	3.18955	3.0344
BAA35268	ybeH	1.27526	1.44254	1.0698	1.0595	0.751797	1.13872	1.02113	0.945553	1.03499	1.07547	1.11023
BAE77208	deaD	2.19958	2.20076	2.18617	2.22288	2.40221	2.22829	2.23271	2.18912	2.14747	2.33438	2.19835
BAE76253	adk	3.17327	3.10828	3.35044	3.24412	3.25538	3.47571	3.15316	3.29482	3.40331	3.4523	3.19929
BAE76829	cysD	2.8985	2.75943	2.97238	3.17738	3.2795	3.32678	3.17247	3.10346	3.05442	3.05638	3.00942
BAA77856	lpxA	2.69371	2.58585	2.62097	2.52234	2.62386	2.5718	2.58277	2.63411	2.64991	2.68583	2.6127
BAA16356	gcvR	2.49924	2.60273	2.38219	2.5692	2.62557	2.491	2.5703	2.56077	2.55829	2.41645	2.4949
BAB96628	polB	1.30914	1.36963	1.42158	1.36259	1.34601	1.35442	1.40937	1.30726	1.28692	1.17185	1.36103
BAE76250	ybaB	2.71584	2.59898	2.75587	2.55105	2.68126	2.74699	2.58925	2.68492	2.89864	2.73856	2.6268
BAE76391	ycgY	0.916218	1.03928	0.857653	0.753542	0.705656	0.841515	0.868355	1.08922	0.945379	0.874176	0.947062
BAE77209	nlpI	3.00829	3.00112	3.08949	3.10517	3.18589	2.99924	3.07545	3.13832	2.97305	3.0229	3.04555
BAA35367	phr	1.41019	1.14047	1.13194	1.13356	1.09929	1.14292	0.971745	1.14353	1.18286	0.901624	1.16963
BAA15858	hisI	2.40455	2.35069	2.63424	2.71726	2.52846	2.62928	2.62664	2.74434	2.64372	2.91752	2.57363
BAA16458	yphH	1.41039	1.30032	1.14599	1.27929	1.28483	1.13319	1.19173	1.54189	1.07558	1.14607	1.2273
BAA15477	btuD	1.94773	2.05661	1.98593	2.09727	2.01646	2.05533	2.09474	2.06702	1.93916	1.87553	1.99903
BAA14982	ydbK	2.19995	2.16909	2.28174	2.44595	2.20688	2.24993	2.35581	2.35861	2.08843	2.43382	2.38231
BAE77112	ttdA	0.57325	0.798544	0.618711	0.337728	0.737783	0.620487	0.779915	0.243707	0.674911	0.652924	0.392945
BAE77143	exuT	1.39036	1.4496	1.08296	1.29079	1.28812	1.1643	1.28903	1.24766	0.999528	1.07109	1.19544
BAA15102	narV	0.800272	1.1152	0.682638	0.706107	0.634587	0.649491	0.836843	0.690007	0.892374	0.821545	0.815326
BAE76619	yohK	1.17634	1.39276	0.934615	1.09944	1.03126	0.892604	1.09874	0.999993	1.1287	1.02776	1.13336
BAA16504	yfjG	2.44134	2.25454	2.23017	2.02674	2.18025	2.00432	2.15014	2.25237	2.17724	2.11215	2.11798
BAE76516	astB	0.669644	1.22253	1.13814	1.21376	1.1191	1.26586	1.36357	1.01508	0.802139	1.10462	1.11119
BAA14990	ldhA	1.41728	1.60784	1.61534	1.43222	1.41393	1.66316	1.48827	1.36895	1.52812	1.51362	1.495
BAA16258	glk	2.22358	2.20588	2.44689	2.41435	2.45222	2.55412	2.50098	2.41661	2.49704	2.35093	2.36901
BAE77755	yhjV	1.41972	1.23897	1.60888	1.18246	1.39141	1.28456	1.22414	1.33399	1.32768	1.44007	1.22797
BAE77557	atpC	3.36744	3.12827	3.1541	2.85261	3.09877	2.88448	2.88728	2.86867	2.96722	3.12569	2.95501
BAA15073	ydcW	1.188	1.45185	1.47864	1.6841	1.43934	1.70055	1.63362	1.56041	1.46181	1.43906	1.61875
BAE76504	ydiN	0.107617	0.493408	0.238613	0.00338138	0.149514	0.233005	0.426694	-0.239352	0.54056	0.646107	0.0225406
BAE76405	ydaL	1.76994	1.95839	1.92443	2.04119	1.9216	2.01433	1.95978	1.79191	1.93196	2.15251	2.02893
BAE77339	secE	3.14727	3.07126	3.02709	2.99513	3.12038	2.93977	3.05073	3.07963	3.08874	3.27433	3.01129
BAA16374	hyfF	0.688127	0.653104	0.111766	0.285581	0.398516	-0.0657786	0.218672	0.244083	0.0390015	0.05267	0.550204
BAE78238	treC	1.53196	0.912659	1.34846	1.29129	1.14953	1.13509	1.21828	1.14675	1.28103	1.14566	1.03251
BAE77721	avtA	2.66446	2.60912	2.80145	2.62809	2.86009	2.56713	2.66276	2.83856	2.83537	2.6877	2.67913
BAA36030	umuD	1.19001	1.77116	1.76073	1.58346	1.89646	1.7013	1.80994	1.61043	1.81103	1.6967	1.67942
BAA35327	nagE	1.88678	1.82075	2.18584	1.90158	2.12323	2.32228	2.13123	1.91909	2.17306	2.19073	1.86731
BAA35348	potE	0.854168	1.04464	0.865248	0.951985	0.919327	0.959908	0.851443	0.825278	0.864205	0.987605	0.958685
BAE78220	msrA	2.2858	2.38389	2.15566	2.37631	2.18772	2.17451	2.23185	2.31311	2.15588	2.33805	2.33867
BAE78160	yjeM	0.687915	0.743706	0.418676	0.384701	0.615985	0.6656	0.497451	0.455974	0.642903	0.758507	0.458117
BAE77651	ttk	2.5664	2.44082	2.46275	2.49106	2.6852	2.53394	2.53475	2.51938	2.571	2.64602	2.47435
BAE77623	ilvN	1.91317	2.07819	2.36829	2.39254	2.39448	2.35498	2.38587	2.43524	2.2564	2.60886	2.21593
BAE77379	hslU	2.56615	2.38844	2.6205	2.50474	2.73597	2.55298	2.59725	2.54218	2.71991	2.72632	2.43885
BAE77680	gpmI	2.69726	2.89052	2.75799	3.0442	2.91245	3.07846	2.99926	2.87417	3.0953	2.98256	2.93866
BAE77464	tatB	2.47322	2.44365	2.81735	2.72038	2.86028	2.83031	2.76899	2.77832	2.74087	2.7458	2.66417
BAE78200	yjfY	1.51849	1.59434	1.26748	1.60759	1.24649	1.16245	1.36602	1.44833	1.11122	1.21036	1.58352
BAE77762	bcsB	1.10697	1.20857	1.52443	1.25353	1.40603	1.3178	1.31849	1.09009	1.33969	1.39286	1.24967
BAA16105	nuoM	2.5354	2.50231	2.8829	2.61966	2.6231	2.64605	2.69724	2.70001	2.68823	2.63334	2.64194
BAE77985	rpsH	3.44528	3.32923	3.5573	3.38669	3.54555	3.52867	3.47214	3.49823	3.57137	3.53234	3.42481
BAE77017	yggV	2.02706	2.06509	2.16086	2.18219	2.3311	2.16254	2.23419	2.22044	2.15624	2.23771	2.14115
BAA15850	hisG	2.26511	2.3085	2.64637	2.88509	2.61193	2.83426	2.72864	2.79526	2.71826	2.94964	2.6371
BAA14983	ydbJ	2.32016	2.56123	2.59603	2.47588	2.28128	2.34315	2.34468	2.38692	2.45518	2.26636	2.47646
BAE77091	tolC	2.92529	2.81261	2.85507	2.5241	2.85511	2.87038	2.82809	2.88273	2.7763	2.86498	2.69075
BAA14806	rluB	2.35732	2.30956	2.425	2.38105	2.31463	2.42408	2.34607	2.39855	2.47695	2.29643	2.36152
BAA35713	ycbZ	2.11537	2.02634	2.11352	2.03853	2.13123	2.18981	2.12485	2.13117	2.13328	1.99064	2.06155
BAE78130	yjdK	0.485946	1.15899	0.543028	0.735119	0.758495	0.660397	0.899006	0.716931	0.589086	0.818436	0.714687
BAA15786	yedA	0.567902	-0.195806	-0.187036	-0.358445	-0.505042	-0.237563	-0.98755	0.591625	-0.265917	-0.411628	-0.0399855
BAA16501	recN	1.68802	2.2046	2.24931	2.1154	2.29188	2.13172	2.25478	2.0358	2.18759	2.19086	2.05906
BAE77984	rpsN	3.40677	3.36499	3.77346	3.65826	3.79171	3.71756	3.70936	3.70128	3.78394	3.73951	3.62859
BAE76442	ydcY	2.77033	2.75417	2.38958	2.44881	2.37798	2.43674	2.32977	2.38221	2.48194	2.35342	2.40425
BAA15431	ydhQ	1.56839	1.88791	1.80106	2.1231	1.90034	1.87124	2.04665	1.89635	1.76442	1.80412	2.09462
BAE76794	hycI	1.75238	1.81011	1.45746	1.63168	1.59378	1.50961	1.67945	1.57607	1.56273	1.64781	1.62777
BAA36064	ychM	1.37243	1.38222	1.39701	1.08972	1.05178	1.3192	1.06964	1.22651	1.54086	1.36877	1.28178
BAE77515	rho	2.89882	2.88235	3.07473	3.06955	3.13171	3.1373	3.04437	3.13012	3.09688	3.08075	3.0185
BAE77189	yraI	-0.0951814	0.385778	-0.104976	-0.0466885	0.53126	0.335632	0.218639	-0.391482	0.332855	0.450385	0.305244
BAE76341	entF	1.00092	1.3115	0.933429	1.3506	1.3066	1.20309	1.56259	1.42082	0.761425	1.25568	1.1738
BAA15610	yeaY	2.11057	2.24969	1.81208	2.05029	2.01573	1.87006	2.03251	1.9397	2.1234	2.08649	2.10343
BAE77395	fieF	2.26194	2.26313	2.21496	2.34956	2.33549	2.12098	2.27983	2.2672	2.19232	2.30615	2.30777
BAE76445	yncE	2.31028	2.28072	2.22765	2.60081	2.32112	2.62494	2.54052	2.55409	1.96616	2.60902	2.28064
BAE77210	pnp	2.93776	2.96142	3.10361	3.13358	3.18734	3.13451	3.1218	3.14306	3.0984	3.09949	3.06851
BAE77391	tpiA	3.32675	3.29961	3.15787	3.3413	3.33936	3.14302	3.33981	3.2743	3.36185	3.30571	3.3649
BAE77508	rffC	1.55941	1.28101	1.59022	1.48989	1.56265	1.48109	1.50777	1.56102	1.54631	1.56972	1.51542
BAE77842	ugpE	1.007	1.21367	0.955503	1.03112	1.02834	1.00003	1.27272	1.0408	0.892491	1.15343	1.10069
BAE76708	yfeO	1.3182	1.42129	1.03432	1.33856	1.31932	1.03315	1.29035	1.18676	1.04141	1.15593	1.287
BAE77676	tdh	1.80821	2.06689	1.85054	1.98928	2.05298	2.01529	2.07416	1.83939	1.94301	2.16405	1.919
BAE76955	lysS	2.79461	2.78942	3.05705	2.98555	3.08467	3.06636	2.99206	2.99406	3.03885	3.15815	2.92777
BAE77837	livM	2.15877	1.89538	2.20174	2.02066	2.08712	2.00554	2.0231	2.14126	2.05192	2.17181	2.00631
BAA16432	hcaR	2.05118	2.06913	2.39567	2.32551	2.35595	2.235	2.42739	2.41175	2.17026	2.3255	2.23967
BAE77641	recG	1.95942	1.91866	2.03885	2.07045	2.13715	2.0131	2.11166	2.03767	1.99825	1.90489	2.02292
BAE77901	aroK	3.04516	2.89374	2.97099	2.92023	3.0162	2.92861	2.92609	3.01207	3.01008	3.01434	2.8855
BAE77642	trmH	1.97625	1.92585	1.85354	1.94427	1.96185	1.88606	1.97602	1.96645	1.9707	1.90657	1.90547
BAB96627	hepA	1.78618	1.76638	1.86545	1.85497	1.92847	1.92869	1.86579	1.80509	1.8905	1.91538	1.80119
BAE77500	aslA	1.0575	1.08571	0.934955	1.03043	0.946303	0.985921	1.01246	0.659725	0.928325	0.871208	1.08558
BAB96739	cdaR	1.10256	1.07889	1.66178	1.24203	1.32399	1.28033	1.35982	1.44882	1.36218	1.2843	1.11792
BAA35834	ymdA	0.862835	1.15842	0.858703	0.796268	0.91111	0.638999	0.574714	0.588593	0.737662	0.598068	0.781335
BAE77982	rplX	3.24192	3.12299	3.14314	3.01598	3.09895	3.0856	3.04725	3.0965	3.16658	3.12417	2.99618
BAB96721	yadB	1.60827	1.45121	1.33398	1.27209	1.41336	1.36393	1.36291	1.45433	1.46275	1.47931	1.33237
BAE78284	fecI	1.69843	1.3451	1.38181	1.57372	1.37938	1.22658	1.58961	1.88832	1.40052	1.52325	1.42659
BAE77992	rpmJ	3.20542	3.1345	3.46996	3.33998	3.51491	3.5586	3.34516	3.38701	3.41921	3.3468	3.27121
BAE77471	ysgA	2.11263	2.33572	2.34405	2.42855	2.28515	2.36781	2.39649	2.36062	2.26056	2.30843	2.35184
BAE77438	bipA	3.02692	2.95419	3.03425	2.92199	2.99931	2.90306	2.96801	3.02356	3.13616	3.17795	2.95938
BAE77457	fadB	1.18387	1.44977	2.01691	1.82084	1.85234	1.94382	2.06989	1.77567	1.3784	1.98978	1.64217
BAA16198	yfcZ	2.63304	2.38134	1.57631	1.83474	1.82441	1.75137	1.7895	1.6511	1.70757	1.62884	1.81113
BAE77527	ilvE	2.72675	2.07316	2.4215	2.48438	2.55243	2.49555	2.43916	2.38064	2.47982	2.50846	2.3475
BAE76219	lon	2.58265	2.50871	2.63801	2.55067	2.72535	2.73885	2.64303	2.63254	2.73137	2.74525	2.54846
BAE76404	abgB	0.539245	0.750543	0.701206	0.660361	0.564788	0.721521	0.558277	0.550654	0.704394	0.587047	0.648794
BAA15848	yeeY	1.11433	1.37201	1.15531	1.35502	1.25756	0.991277	1.24182	1.21422	1.0887	1.12082	1.43195
BAE78377	serB	2.21208	2.14083	2.25538	2.43281	2.43861	2.38897	2.33399	2.36105	2.43381	2.34464	2.32201
BAA35403	tolQ	2.1572	2.17285	2.40858	2.27659	2.36241	2.40463	2.34077	2.38625	2.49731	2.31683	2.30582
BAB96710	yadD	1.12625	1.0754	1.31194	1.08777	1.08778	1.11027	1.06066	1.25004	1.05939	1.08408	1.17052
BAA16181	trmC	1.72239	1.6602	1.65004	1.771	1.94093	1.61207	1.75632	1.77929	1.76452	1.71145	1.75677
BAE77684	gpsA	2.54093	2.42379	2.62855	2.579	2.6711	2.58776	2.66482	2.57889	2.57708	2.56622	2.56568
BAE77072	ygiQ	2.04519	2.05362	2.28061	2.30989	2.3313	2.25983	2.25078	2.23106	2.29363	2.32329	2.18763
BAE77239	yrbF	2.46831	2.43526	2.55395	2.5944	2.67358	2.42335	2.57901	2.59255	2.44004	2.63623	2.61164
BAA35665	ycbJ	1.44479	1.69855	1.57668	1.74066	1.45377	1.60015	1.6339	1.60397	1.87538	1.70581	1.76657
BAE77350	oxyR	2.45891	2.41857	2.64341	2.44771	2.55116	2.46585	2.45595	2.52371	2.55494	2.57113	2.3941
BAA16441	hcaE	1.18488	1.3337	1.33705	1.48206	1.48465	1.28434	1.42286	1.27959	1.18361	1.1637	1.51478
BAE76495	ydhR	2.30854	2.49184	2.49026	2.33549	2.18267	2.10426	2.27803	2.47256	2.458	2.48964	2.47468
BAA35273	lipB	2.18875	2.08912	2.21798	2.11778	2.12909	2.19925	2.14736	2.20391	2.31927	2.27088	2.18329
BAE77345	btuB	1.72864	1.60645	2.04525	1.94933	2.25686	1.9178	1.94514	1.99924	2.04715	1.99514	1.99889
BAA36009	minD	2.59614	2.52442	2.6504	2.67268	2.65907	2.69632	2.6682	2.74509	2.75111	2.72531	2.62248
BAA36091	narK	0.518906	0.404104	0.357164	0.470693	-0.111358	0.355091	0.0937006	0.0667446	0.773579	0.315449	0.521786
BAA16182	yfcM	2.01611	1.96131	2.35918	2.32822	2.31464	2.28761	2.34854	2.41142	2.33613	2.22753	2.31838
BAA15595	yeaU	1.32519	1.45912	1.27061	1.47801	1.26778	1.38931	1.42644	1.42155	1.3397	1.45142	1.46279
BAE77994	rpsK	3.41802	3.36351	3.65965	3.49375	3.65892	3.6331	3.55062	3.56667	3.66249	3.63183	3.49011
BAA35436	ybhC	2.44402	2.37914	2.73732	2.56806	2.67578	2.7646	2.58053	2.64074	2.91501	2.62477	2.54059
BAE76752	srmB	2.25145	2.26964	2.43755	2.44238	2.44711	2.34943	2.41706	2.37918	2.37754	2.41322	2.32827
BAE77887	envZ	1.89733	1.74282	1.8831	1.93826	1.96646	1.79508	1.88327	1.93161	1.85222	1.79232	1.93469
BAE78063	yjcC	1.44949	1.34476	1.31481	1.24865	1.17963	1.00636	1.25129	1.49553	1.22746	1.24213	1.3158
BAE77415	fdoG	2.18945	2.21753	2.54847	2.48962	2.36845	2.38678	2.47224	2.34264	2.44122	2.31836	2.44543
BAE78174	hflX	2.57674	2.53334	2.71227	2.68231	2.64132	2.73541	2.65438	2.80393	2.67858	2.69176	2.67218
BAE78157	frdB	1.42997	1.59092	1.25287	1.69914	1.55907	1.47133	1.64605	1.50477	1.5094	1.3891	1.71214
BAE77710	sgbE	0.97134	1.14968	1.06525	0.925141	1.00998	0.976433	1.0807	0.976583	1.0653	1.06802	0.972471
BAE77658	coaD	1.96659	1.7894	1.76798	1.81424	1.93909	1.61476	1.77278	1.84334	1.81007	1.85982	1.72428
BAE77871	rtcB	1.12556	1.38629	1.21453	1.39718	1.393	1.37258	1.40152	1.30214	1.30483	1.25924	1.33425
BAE77352	argB	2.19323	2.21021	2.78646	2.6684	2.78237	2.75983	2.70541	2.63377	2.61656	2.68317	2.54714
BAE77819	yhhT	1.15354	1.24152	0.972252	1.03426	1.09284	0.983659	1.1428	1.07958	1.06246	0.919157	1.1702
BAA16274	xapB	1.18602	1.30488	0.879449	0.89671	0.840948	0.738068	0.865003	0.798395	0.827696	0.752144	0.927812
BAE76735	tadA	2.12649	2.02187	2.01243	2.07927	2.19532	1.96529	2.11362	2.10267	2.01212	1.99771	1.98921
BAE77650	pyrE	2.20062	1.47386	1.54819	1.49991	1.69818	1.68413	1.54387	1.54498	1.71902	1.78141	1.48361
BAE76866	yqcD	2.19522	2.05686	2.12319	2.12463	2.23725	2.11822	2.12304	2.19347	2.21857	2.18973	2.08615
BAE76903	tas	2.52424	2.60124	2.44211	2.49363	2.5352	2.3179	2.48704	2.44821	2.47593	2.55065	2.45872
BAA16267	yfeA	1.84306	1.81812	1.66963	1.70896	1.81271	1.66259	1.77868	1.69393	1.68147	1.89699	1.66997
BAA36059	ycgV	1.09651	1.2275	1.07199	1.11665	1.03723	1.03689	1.0311	1.11272	1.13596	1.03329	1.1681
BAE77704	yiaY	0.127764	0.621614	0.383668	0.14912	0.54828	0.49185	0.301793	-0.547856	0.304786	0.349181	0.0703083
BAE77884	yhgF	2.36091	2.29195	2.40711	2.5315	2.80693	2.58498	2.55097	2.49911	2.62256	2.50545	2.46078
BAE76249	dnaX	2.15002	2.14201	2.2816	2.15896	2.23078	2.31038	2.14859	2.22312	2.24387	2.25364	2.17552
BAA16578	yqiK	0.439009	0.433285	0.443852	0.445471	0.32445	0.5194	0.560425	0.848512	0.128227	0.518687	0.512353
BAA77882	mltD	3.19953	3.13686	3.43481	3.16271	3.29946	3.49541	3.23974	3.20093	3.36726	3.39373	3.15477
BAE78209	cycA	2.23031	2.24916	2.37209	2.35355	2.29775	2.27079	2.35149	2.40891	2.35248	2.38499	2.2422
BAA35877	mviN	1.7536	1.79381	1.85473	1.75176	1.68014	1.86473	1.76018	1.78578	1.95677	1.87201	1.77527
BAE76533	yeaR	0.529171	0.955419	0.202027	0.371239	-0.074195	0.553352	0.533942	0.750024	0.792555	0.667541	0.86535
BAA16485	tyrA	2.23487	2.04716	2.49765	2.26934	2.44259	2.35749	2.22647	2.30069	2.04578	2.54103	2.22113
BAE77864	glgP	2.39419	2.49555	2.44564	2.5461	2.51548	2.58023	2.54196	2.4829	2.36924	2.5297	2.53026
BAA15855	hisA	2.00698	2.02395	2.49887	2.54654	2.3717	2.45511	2.46589	2.53312	2.4669	2.73197	2.36678
BAA15208	yneI	1.36485	1.65458	2.30753	1.6819	1.75198	1.85044	1.82196	1.88872	2.019	1.74483	1.76977
BAA35388	sdhC	3.21484	3.22753	3.707	3.32061	3.45032	3.66437	3.4838	3.47329	3.47881	3.37427	3.30305
BAA35601	clpA	2.21417	2.55343	2.65809	2.71316	2.61549	2.63207	2.65214	2.62789	2.68517	2.7172	2.80512
BAA35728	mgsA	2.73735	2.56126	2.54858	2.42633	2.43158	2.51834	2.40236	2.57211	2.69846	2.48374	2.3784
BAA35233	ybdO	0.583051	1.09544	0.890688	0.79846	0.992391	1.12901	0.858378	0.819131	1.05116	0.953269	0.672027
BAE77733	ysaB	1.44028	1.39505	1.48065	1.33818	1.29832	1.0612	1.28433	1.40227	1.19346	1.35814	1.19283
BAA14793	trpB	2.29631	2.25695	2.79956	2.6344	2.7133	2.8049	2.58727	2.632	2.60139	2.7339	2.55845
BAE77145	yqjA	2.31125	2.30368	2.06872	2.21651	2.22914	2.12159	2.17984	2.10705	2.17219	2.17456	2.17831
BAE78145	groL	3.16228	3.0262	3.36501	3.18396	3.37098	3.38074	3.24468	3.25042	3.34375	3.29277	3.12783
BAA16185	aroC	2.61141	2.59224	2.74033	2.72892	2.78204	2.68064	2.7304	2.75485	2.71387	2.73171	2.6925
BAE77939	kefG	1.66583	1.587	1.38672	1.18638	1.30297	1.02911	1.23672	1.1745	1.24753	1.19714	1.29372
BAA77905	prfH	0.288143	2.08504	2.26532	2.19039	2.26197	2.37613	2.22671	2.24838	2.26821	2.19108	2.16445
BAE77983	rplE	3.34738	3.26533	3.44218	3.26446	3.3934	3.3532	3.33849	3.38633	3.47059	3.43229	3.31093
BAE77986	rplF	3.25924	3.14495	3.37602	3.20148	3.37922	3.33206	3.28358	3.285	3.41125	3.32823	3.22437
BAE78093	rpiB	1.15814	2.60789	3.68376	3.17008	3.28982	3.44584	3.34171	3.44744	3.37593	3.16688	3.11854
BAA15551	topB	1.95448	1.76615	2.05367	2.00981	2.07372	2.00026	2.04508	2.09604	1.91916	1.94478	2.02655
BAA16089	menD	1.552	1.34529	1.44729	1.36536	1.40587	1.40235	1.35016	1.432	1.42779	1.39454	1.49809
BAE76992	yggC	1.9138	1.89446	1.77733	1.80481	1.7078	1.61191	1.74148	1.84709	1.74589	1.66888	1.79141
BAE78006	smf	0.803859	0.781094	0.684737	0.9038	0.637761	0.625272	0.743821	0.513489	0.712893	0.417734	0.765073
BAA14908	mpaA	1.93243	2.10088	1.96974	2.06176	1.92421	1.98831	1.9475	2.04451	2.09712	1.93005	2.03483
BAA15103	narW	0.508562	1.06652	0.52266	1.01848	0.808067	0.828738	0.901851	0.763333	1.00443	0.832779	1.15695
BAE76179	phoB	1.75407	1.7146	1.7236	1.79469	1.68705	1.89271	1.76598	1.98912	1.76497	1.8587	1.77379
BAE77293	mreB	2.96075	2.92665	2.84236	2.85156	2.99537	2.8068	2.85105	2.8879	2.80554	2.9164	2.83161
BAB96671	yacF	2.00499	1.98397	1.98459	1.91119	1.99967	1.94242	1.90317	2.04685	1.99666	1.88491	1.9624
BAA35661	lpxK	1.78285	1.69307	1.60973	1.61183	1.6396	1.65277	1.68859	1.69814	1.70984	1.82946	1.64508
BAE77455	yigZ	1.67549	1.59754	1.98349	1.75164	1.87384	1.94452	1.86104	1.89789	1.8524	1.78429	1.74826
BAA35417	gpmA	3.12946	3.09049	3.23193	3.28483	3.30507	3.36581	3.23851	3.35958	3.32107	3.26889	3.31867
BAA15209	yneJ	1.5257	1.67393	1.448	1.50601	1.47973	1.44462	1.5214	1.46019	1.45412	1.34931	1.52471
BAE77192	yraL	2.1583	2.45896	2.55796	2.53226	2.57268	2.44898	2.53591	2.57494	2.48463	2.55192	2.50908
BAE77990	rplO	3.29378	3.1591	3.69268	3.59127	3.76123	3.74128	3.66068	3.59161	3.66939	3.68992	3.55484
BAE77117	dnaG	2.43945	2.40911	2.41612	2.55927	2.60249	2.63037	2.56554	2.5441	2.53802	2.72209	2.47805
BAB96598	ispH	2.17821	2.19304	2.42306	2.32205	2.4411	2.3829	2.35653	2.38876	2.3081	2.42287	2.33679
BAE78025	yjbD	2.55295	2.39118	2.51521	2.34968	2.40007	2.39862	2.35324	2.5504	2.41133	2.64981	2.3761
BAA15402	slyB	3.56677	3.38545	3.4979	3.62848	3.45392	3.58355	3.58672	3.66432	3.55087	3.60109	3.59723
BAE77568	bglH	0.331649	0.401255	0.251726	-0.0633043	0.124601	0.241566	0.224125	0.221938	0.162483	0.58696	0.100253
BAA16192	yfcU	0.972834	1.2351	1.26982	1.27331	1.23431	1.22003	1.29883	1.08821	1.14403	1.18003	1.21977
BAA16354	nlpB	2.78566	2.75643	2.85541	2.80739	2.98101	2.7914	2.85307	2.81669	2.90731	2.91176	2.81275
BAE77162	tdcE	0.626978	0.689104	0.494109	0.480971	0.733016	0.733713	0.81201	0.68012	0.722863	0.883757	0.56728
BAE78217	ytfJ	1.17558	1.08664	1.58562	1.22489	1.27273	1.35298	1.43172	1.49558	1.32058	1.35422	1.21273
BAA16558	csrA	3.72253	3.61813	3.37128	3.43369	3.43663	3.24754	3.43148	3.48682	3.40271	3.48435	3.48956
BAA35275	dacA	2.59857	2.52845	2.65989	2.60574	2.58622	2.79305	2.58238	2.62551	2.78322	2.67378	2.5718
BAA16111	nuoG	2.56956	2.60871	3.0076	2.76537	2.77876	2.82108	2.83959	2.87821	2.84208	2.69085	2.74744
BAA15330	ynfM	1.61106	1.50432	1.18078	1.10441	1.40763	1.1229	1.3296	1.36124	1.57173	1.59918	1.31311
BAE78024	yjbC	2.21767	2.14906	2.33329	2.28493	2.38831	2.303	2.25815	2.35466	2.28274	2.2919	2.25252
BAA16396	xseA	2.21685	2.3577	2.20692	2.2749	2.20408	2.2015	2.12834	2.28126	2.24558	2.40002	2.21193
BAE77679	envC	2.26611	2.21781	2.22223	2.34725	2.44262	2.33109	2.33197	2.33466	2.35411	2.30343	2.29753
BAE76303	cysS	2.30384	2.26285	2.51164	2.31386	2.32379	2.49914	2.31147	2.41969	2.51215	2.40973	2.2875
BAA35356	kdpA	0.258177	0.343928	-0.262543	0.274011	-0.114023	0.294729	-0.0119919	-0.170569	0.0940283	0.163767	0.191654
BAA16345	yffB	2.14931	2.17513	2.2321	2.30917	2.25549	2.16883	2.2516	2.38968	2.30174	2.26963	2.28959
BAE78258	yjgP	1.97666	2.04882	2.05016	1.87394	1.90468	1.87385	1.89638	1.93035	1.95937	1.91321	1.92622
BAE76260	ybaK	2.27644	2.20339	2.42088	2.26081	2.38694	2.40108	2.26979	2.3354	2.49076	2.38588	2.2608
BAE76706	ypdI	0.799028	1.10573	0.725391	0.961549	0.679418	0.674863	0.484806	0.723202	0.558464	0.772832	0.809004
BAA16074	yfaO	1.75476	1.54227	1.64723	1.74199	1.65583	1.64816	1.54238	1.47396	1.49578	1.56402	1.67685
BAA15999	rcsD	2.23359	2.25396	2.25884	2.27835	2.35478	2.18656	2.25535	2.24458	2.23714	2.19232	2.23341
BAA35352	kdpD	1.51009	1.67507	1.54408	1.60394	1.56146	1.60907	1.58136	1.52028	1.57358	1.52223	1.53841
BAA16113	nuoF	2.31862	2.30311	2.95572	2.66546	2.70129	2.75364	2.76402	2.77761	2.74615	2.6045	2.6426
BAE76901	ygdQ	1.95398	1.61593	1.45939	1.39561	1.84306	1.17185	1.46055	1.53638	1.50256	1.50716	1.47817
BAA16384	hda	1.81644	1.75525	2.08075	1.99553	2.07799	1.97283	2.12277	2.15278	1.92983	2.04805	2.01065
BAE76186	tgt	2.56218	2.42307	2.51777	2.64008	2.7547	2.74443	2.64621	2.56849	2.55995	2.49539	2.52859
BAE76538	yebO	2.72982	2.42717	2.23745	2.01126	2.00741	1.74857	2.01857	2.19251	2.10755	2.07375	2.04694
BAA77874	metQ	3.21135	3.30597	3.67673	3.44206	3.44879	3.54995	3.36514	3.51687	3.57082	3.54669	3.36568
BAE77018	yggW	1.99997	2.04859	2.17857	2.18706	2.33452	2.11899	2.19197	2.19899	2.09167	2.14496	2.12478
BAE76200	dxs	2.26635	2.25664	2.45467	2.30936	2.40067	2.47872	2.38118	2.45056	2.51756	2.35491	2.33598
BAE76727	yfgI	1.03952	1.19225	0.836619	1.06889	1.13856	0.945848	1.19505	1.03225	1.14364	1.14393	1.08919
BAB96747	pyrH	2.56874	2.5262	2.86303	2.90377	2.96279	2.95902	2.88401	2.85281	2.7847	2.95177	2.82789
BAA15909	gmd	0.256238	0.383627	0.463975	0.396443	0.386346	0.296145	0.0993013	0.313088	0.409789	0.597805	0.434568
BAE76454	yddW	1.98301	1.94179	1.7866	1.95373	1.85297	2.03879	1.881	1.81515	2.03688	1.83792	1.8526
BAE78118	adiY	0.361323	0.595746	0.702981	0.32592	0.602839	0.52873	0.408612	0.282156	1.06323	0.577134	0.437109
BAE78061	ssb	2.81171	2.66126	2.7606	2.62973	2.71189	2.66091	2.64511	2.77084	2.77846	2.90965	2.69518
BAE76651	yejK	2.42227	2.36672	2.41202	2.58377	2.52343	2.50015	2.52514	2.45891	2.51193	2.53909	2.45711
BAB96668	yacG	2.16291	1.98857	1.71694	1.46734	1.64981	1.61695	1.5751	1.84104	1.66571	1.55645	1.63579
BAA35945	potB	1.63659	1.48633	1.79622	1.62113	1.50094	1.63957	1.71582	1.63793	1.86731	1.66857	1.6191
BAE77176	sohA	2.07738	2.07251	1.85624	1.88074	1.81175	1.76903	1.84603	1.86347	1.85122	1.89551	1.89912
BAA35630	ycaD	1.68594	1.61811	1.4398	1.3107	1.61357	1.48769	1.38874	1.47856	1.6208	1.50191	1.46764
BAE77509	rffH	1.82279	1.60584	1.92865	1.87905	2.00982	1.92591	1.96175	2.00364	1.87684	1.98004	1.89432
BAA16114	nuoE	2.31891	2.39794	3.06291	2.85273	2.88551	3.04071	2.93326	2.87401	2.87103	2.7072	2.77464
BAB96587	mog	2.06411	2.01579	2.11635	2.04428	2.21797	2.18785	2.16195	2.17195	2.12385	2.1377	2.0992
BAE76540	yobH	2.5413	2.30501	1.81126	1.74519	1.76278	1.54107	1.68377	1.745	1.65387	1.76776	1.80886
BAE78280	fecC	0.981373	0.657033	0.428174	0.599187	0.468168	0.691841	0.491317	0.641667	0.543875	0.728916	0.797558
BAE77683	secB	2.84232	2.78344	3.04913	3.01596	3.10534	2.98708	3.06668	3.05174	3.04909	3.05456	2.94523
BAE77988	rpsE	3.26501	3.12577	3.37708	3.20172	3.37369	3.36297	3.28245	3.30295	3.38845	3.34711	3.21973
BAA16313	murP	0.865806	0.791316	0.839292	0.899877	0.944493	0.862488	0.799334	1.0705	0.838009	0.782395	0.845254
BAE76714	ypeA	2.09255	2.09147	2.1516	2.05061	2.11363	2.03035	2.09419	2.12075	2.08208	2.07598	2.0827
BAE77190	yraJ	0.938889	0.900247	0.770189	0.830727	0.871376	0.677029	0.821955	0.715044	0.681037	0.715948	0.704896
BAA16394	guaA	2.53322	2.58383	2.75703	2.7786	2.78156	2.73079	2.71928	2.82814	2.79317	2.91572	2.80121
BAE77734	glyQ	2.57861	2.43396	2.96051	2.69979	2.80229	2.7182	2.67906	2.68562	2.73999	2.85706	2.68128
BAE77702	selA	1.89797	1.88884	2.00983	1.98478	2.22605	2.0704	2.03464	2.00663	2.06619	2.1208	2.01176
BAE76979	yqfE	1.16478	1.1694	1.12996	1.24778	1.23153	1.07877	1.25221	1.11212	1.20026	1.04281	1.13984
BAE78156	frdC	1.31809	1.47377	1.25465	1.53911	1.34809	1.28382	1.50597	1.48702	1.3806	1.37334	1.52728
BAE77299	panF	1.57908	1.3662	1.27021	1.35305	1.53055	1.32919	1.36698	1.28959	1.3071	1.46802	1.35955
BAE76429	paaX	1.76723	1.91043	1.90995	1.89718	1.86911	2.06011	1.95692	1.95883	1.95078	1.78287	1.89107
BAA16395	guaB	2.43997	2.53789	2.57742	2.64234	2.52019	2.53854	2.52797	2.68145	2.63657	2.70132	2.64121
BAE77843	ugpC	1.49996	1.69202	1.75745	1.8375	1.85461	1.90208	1.90671	1.69981	1.65007	1.66819	1.74268
BAA36095	narH	0.758761	0.952771	0.868438	0.966962	0.723388	0.982468	0.893929	0.857649	1.25922	0.796757	1.0653
BAE77551	atpE	3.62268	3.40996	3.8131	3.5765	3.77434	3.71773	3.6276	3.57388	3.64735	3.76361	3.57181
BAA15211	marC	1.98255	2.04652	2.02085	2.18591	2.08425	2.19445	2.20091	2.18123	2.0453	2.03287	2.17937
BAE77730	yiaB	-0.0321661	0.235365	-0.560899	-0.496953	-0.94415	0.25514	-0.346872	-0.350987	-0.57739	-0.471441	-0.316071
BAB96719	folK	1.7703	1.72266	1.79277	1.59579	1.67718	1.65199	1.72353	1.77262	1.73003	1.69835	1.68394
BAE77002	yqgB	2.62489	2.32995	2.07908	1.9183	2.0427	1.78908	1.83933	2.08994	1.97568	2.00336	1.89496
BAA77907	gpt	2.41696	2.3436	2.37891	2.42885	2.56043	2.55231	2.45036	2.45326	2.62949	2.51646	2.48681
BAE77552	atpF	3.58299	3.53103	4.17319	3.99214	4.21143	4.16078	4.02033	3.92104	3.99801	4.08669	3.95671
BAE77380	menA	1.74704	1.59286	1.79725	1.53318	1.805	1.60666	1.64163	1.68015	1.79072	1.66995	1.6477
BAE77386	fpr	2.48428	2.41987	2.41558	2.52911	2.68353	2.2056	2.43546	2.48035	2.37663	2.58155	2.50883
BAE78046	dinF	1.33776	1.29515	1.45214	1.22408	1.28093	1.1909	1.29746	1.29996	1.31248	1.54467	1.33441
BAE78001	mscL	2.73902	2.66709	2.70427	2.55211	2.51408	2.66926	2.50729	2.58676	2.41515	2.52562	2.48305
BAA15312	ynfF	1.06549	1.16322	1.31122	1.36308	1.16596	1.36155	1.36314	1.23757	1.69946	1.26263	1.24191
BAE76809	ygbA	1.37646	1.27259	1.13523	1.12988	0.960399	1.14069	1.10489	1.10225	0.901914	1.16266	1.27836
BAA35879	flgM	2.57449	1.51941	1.33007	1.52712	1.31111	1.43444	1.29617	1.51407	1.43141	1.19694	1.41971
BAE77625	uhpB	1.53845	1.39063	1.37485	1.28619	1.47592	1.3173	1.36163	1.34728	1.37534	1.40233	1.29967
BAA14890	ycjS	0.445387	0.667003	0.687196	0.559272	0.53964	0.802819	0.69814	0.658662	0.739846	0.51783	0.637427
BAE77322	hemE	2.36905	2.27476	2.3178	2.25429	2.29237	2.15423	2.27472	2.29233	2.33968	2.27042	2.28812
BAE76515	astE	0.52066	0.874155	0.828978	1.04816	0.83909	1.05018	1.12932	0.68102	0.55264	0.807745	0.851635
BAA16484	pheA	2.42642	2.56194	2.44506	2.79578	2.50686	2.62045	2.51013	2.76503	2.6591	2.78589	2.58045
BAA16353	purC	3.1445	3.13176	3.30647	3.30161	3.30304	3.32897	3.31173	3.32023	3.3309	3.32941	3.28232
BAE76826	ygbE	1.89849	1.94552	1.69494	1.81095	1.82611	1.74857	1.80791	1.73047	1.78719	1.67954	1.74218
BAA36122	ychE	1.48933	1.71103	1.325	1.53149	1.37499	1.42859	1.47325	1.43255	1.67569	1.52461	1.47688
BAE77890	hslO	2.03051	1.87388	2.25092	2.16127	2.30398	2.25476	2.17898	2.17283	2.21005	2.24232	2.06908
BAA16561	recA	2.76727	2.88701	3.13242	2.93193	3.12869	3.00026	3.08271	3.00759	3.01662	3.04412	2.92895
BAA77910	phoE	0.775082	0.972254	1.07409	0.741183	1.02917	0.999491	0.984525	0.990583	1.09852	1.05666	0.953672
BAA16092	menF	1.87262	1.72447	1.91077	1.82073	1.83949	1.80404	1.8172	1.89129	1.9382	1.86276	1.83718
BAE76905	aas	1.85038	1.85332	1.76023	1.87004	1.79351	1.75618	1.79522	1.69758	1.83839	1.69736	1.77411
BAE77638	yicH	2.09803	2.19745	2.07978	2.20109	2.33588	2.10252	2.17349	2.14107	2.16173	2.22508	2.13815
BAA35611	cydC	2.00373	1.95874	2.10399	2.02026	1.9788	2.12419	1.98381	2.12707	2.16238	1.50333	2.00629
BAE76867	ygdH	2.16717	2.29029	2.4499	2.37083	2.41371	2.27358	2.35445	2.38987	2.44989	2.22453	2.26946
BAA16179	yfcJ	1.47953	1.68577	1.58624	1.61367	1.60034	1.50709	1.54145	1.59123	1.57996	1.7994	1.61015
BAA35229	ybdH	2.13736	2.16104	2.51278	2.20417	2.16837	2.46359	2.23106	2.34915	2.45292	2.28161	2.14469
BAB96695	speE	2.68928	2.75558	2.98108	3.05842	3.088	3.06121	3.08591	2.9311	2.9513	3.13923	2.9173
BAA16109	nuoI	2.07603	2.15906	2.79023	2.42766	2.47434	2.51769	2.50892	2.53901	2.54958	2.33297	2.41109
BAB96694	speD	2.73414	2.78271	3.03907	3.14127	3.17648	3.17229	3.19329	3.00584	3.06291	3.21524	2.96501
BAE78256	holC	2.0884	2.08875	2.08113	2.26173	2.1986	2.22693	2.15944	2.20417	2.12043	2.1779	2.20269
BAE76960	fldB	2.42271	2.26955	2.159	2.2478	2.2815	2.21613	2.30103	2.26346	2.20542	2.3237	2.21584
BAA15631	manZ	2.50988	2.48544	2.83623	2.60647	3.06127	2.73521	2.7481	2.4985	2.68267	2.71528	2.53128
BAA15385	rsxG	1.63481	1.615	1.75899	1.70344	1.43058	1.66338	1.67259	1.70987	1.61265	2.00488	1.60364
BAE77790	yhiS	-0.289544	0.563747	0.466628	0.163598	0.412758	0.443859	0.4853	-0.442635	0.315176	0.397431	0.348254
BAE78158	frdA	1.61825	1.79683	1.60473	2.01672	1.86346	1.78038	1.92121	1.77775	1.76891	1.65265	1.93195
BAE77269	nanR	2.32368	2.33962	2.21233	2.22025	2.32721	2.11463	2.22077	2.21384	2.12673	2.18267	2.17471
BAA77860	accA	2.53232	2.46263	2.64608	2.56163	2.62441	2.61108	2.58414	2.61955	2.68207	2.66105	2.5899
BAE76548	yecN	2.3417	2.34167	2.25898	2.30846	2.26813	2.30517	2.19857	2.19287	2.26278	2.08245	2.1825
BAE76514	ydjQ	1.50827	1.70792	1.8809	1.60128	1.81079	1.53622	1.72274	1.72656	1.74622	1.64016	1.5811
BAA15123	fdnG	0.560464	0.632374	0.365496	0.534838	0.426747	0.619983	0.407683	0.334911	0.828485	0.341888	0.604245
BAE78215	cysQ	2.17783	2.28785	2.12615	2.31658	2.29438	2.33815	2.26325	2.24383	2.1335	2.2451	2.31004
BAE76350	entB	0.642302	1.03727	1.01197	1.60541	1.4174	1.36674	1.76967	1.48323	0.730415	1.24435	1.29411
BAE76242	acrA	2.42866	2.37958	2.6223	2.69436	2.64564	2.69804	2.58131	2.60874	2.60718	2.72465	2.67681
BAE77271	sspB	2.67281	2.48405	2.53895	2.38312	2.38851	2.27933	2.46589	2.46803	2.40845	2.53776	2.45238
BAA35264	dcuC	0.599428	0.486965	0.16155	0.17235	0.176936	0.37858	0.0921773	0.265265	0.615254	0.190501	0.291839
BAA14788	ompW	1.11753	1.01369	1.4171	1.28164	1.02172	1.28003	1.35109	0.908796	2.02528	1.17123	1.44979
BAE76500	sufE	1.50244	1.91645	1.72976	2.04396	1.61963	1.81234	1.94775	1.94539	1.56866	1.57726	1.83158
BAE77460	ubiD	2.35615	2.35176	2.45288	2.3942	2.51545	2.45755	2.46346	2.43309	2.41915	2.42567	2.4041
BAA16184	mepA	2.06565	2.01094	2.16585	2.07864	2.12878	1.96672	2.07031	2.21348	2.1	2.03146	2.07302
BAE77492	yifL	2.35905	2.2892	2.29008	2.13089	2.14442	2.0636	2.10539	2.22843	2.31644	2.05463	2.18163
BAA35907	ycfH	2.19849	2.4213	2.1695	2.37594	2.30966	2.3038	2.3315	2.33628	2.35271	2.37515	2.35565
BAE76478	ynfC	1.94984	2.08943	2.19857	2.2326	2.08524	2.25874	2.15414	2.15227	2.08579	2.03856	2.11901
BAE77155	yhaJ	1.69664	1.75319	1.81109	1.6839	1.74393	1.53364	1.71009	1.63997	1.67773	1.72684	1.75446
BAE77378	hslV	2.33338	2.14739	2.35248	2.28121	2.50998	2.30423	2.35344	2.28761	2.48452	2.47459	2.20393
BAB96645	leuO	0.944125	1.21034	0.980283	1.03347	1.0916	0.906257	1.0761	1.10928	1.34443	1.08277	1.0716
BAE76838	ygcB	0.815927	0.755684	0.694407	0.764688	0.907676	0.759776	0.84408	0.761238	0.593387	0.798682	0.626032
BAA15649	pphA	1.16161	1.40615	1.20417	1.32997	1.29652	1.14817	1.23603	1.30319	1.23499	1.10126	1.3185
BAE77161	tdcF	0.880063	1.14846	0.981692	1.14142	0.973579	1.02471	1.09369	1.01488	0.915428	1.32227	0.976662
BAA36050	ldcA	1.91931	2.03043	1.9152	1.90675	1.83222	1.93087	1.87258	1.95153	2.09313	1.85005	1.92771
BAA35694	ycbR	0.0445986	0.61225	0.590266	0.188144	0.519337	0.675892	0.491332	0.459989	0.876615	0.5353	0.236969
BAA77880	yafD	2.11924	2.36893	2.239	2.28605	2.17735	2.16396	2.194	2.28991	2.33264	2.14789	2.27475
BAE77440	glnL	1.97845	1.91558	2.34598	2.09748	2.29587	2.30057	2.15088	1.93524	2.28573	2.09728	2.09578
BAA15852	hisC	2.15971	2.27505	2.56123	2.75298	2.51698	2.63295	2.60903	2.6839	2.59	2.85802	2.54429
BAA15529	nadE	2.58665	2.69945	2.87602	2.87578	2.89186	2.82188	2.80766	2.89305	2.86578	2.84792	2.81786
BAE78207	ytfB	2.46566	2.51929	2.57259	2.52695	2.48641	2.53964	2.50324	2.52499	2.49699	2.4916	2.52123
BAE77675	kbl	1.55115	1.76137	1.76954	1.87794	2.00616	1.93701	1.95421	1.70404	1.86509	2.00951	1.87996
BAA35658	msbA	2.23256	2.21663	2.24109	2.294	2.29295	2.3525	2.33014	2.35269	2.32355	2.42251	2.25933
BAA35308	lnt	2.07632	2.10449	2.03874	2.02602	2.18628	2.14452	2.12433	2.09889	2.16411	2.10784	2.03045
BAE76262	ybaQ	2.67348	2.87101	2.68446	2.71144	2.7391	2.72003	2.65576	2.73684	2.74535	2.70145	2.71883
BAA15828	yeeX	3.50718	3.41253	3.22879	3.3443	3.27629	3.31912	3.2917	3.33356	3.40289	3.36984	3.34795
BAA35892	flgL	2.74798	1.39733	1.25365	1.39385	1.14508	1.48014	1.33807	1.33066	1.28189	1.39753	1.40961
BAE77458	fadA	1.44384	1.57234	1.83605	1.68492	1.64673	1.70619	1.83241	1.65171	1.31597	1.85681	1.59225
BAE77501	aslB	0.709321	0.29806	0.480738	0.537629	0.520947	0.318667	0.479825	0.742067	0.19437	0.412158	0.499482
BAE76904	ygeD	1.33444	1.32329	1.20844	1.26519	1.15867	1.08962	1.20604	1.16079	1.15975	1.11883	1.27881
BAA35434	ybhI	0.111687	0.473375	0.241157	0.270992	0.0619251	0.446811	0.201817	-0.0214339	0.267942	0.329226	0.165317
BAE78390	arcA	3.14596	3.29609	3.31771	3.36422	3.2776	3.27924	3.28291	3.30252	3.18843	3.23851	3.30049
BAA35849	yceK	1.8256	2.04825	2.00306	2.14519	1.78737	2.10581	2.04101	1.9457	2.0548	1.94094	2.03432
BAE78136	cadC	0.959819	0.92198	0.548212	0.853895	0.920804	0.655956	0.779869	0.856329	0.747482	0.739875	0.880981
BAA35664	kdsB	2.2732	2.24361	2.36224	2.20759	2.20124	2.33885	2.27487	2.32814	2.45718	2.3082	2.31
BAA15180	hipB	1.60991	1.66589	1.81324	1.76561	1.78474	1.84425	1.7207	1.77845	1.78462	1.8662	1.77831
BAE76806	hypD	1.32693	1.40942	1.3143	1.40224	1.38676	1.24347	1.38681	1.33088	1.46849	1.12512	1.3288
BAA35456	ybiH	1.63391	1.73758	1.7035	2.19617	1.69142	1.73426	1.75065	1.67279	1.73167	1.69502	2.16192
BAE78354	yjjP	1.36421	1.49605	1.34918	1.47923	1.25593	1.39381	1.38323	1.31447	1.45326	1.46319	1.4263
BAE76235	ybaA	0.988392	1.67816	1.13963	1.74654	1.27741	1.49468	1.56658	1.33477	1.27597	1.36371	1.72854
BAE76970	gcvT	2.0269	1.98415	2.4767	2.1499	2.46755	2.53169	2.33604	2.29172	2.37443	2.34363	3.37016
BAA35353	kdpC	1.13625	1.1613	0.718039	0.765189	0.762989	1.04873	0.69217	0.706987	0.868854	0.756617	1.02278
BAE77472	metE	3.28335	3.27949	3.76571	3.56253	3.81797	3.72018	3.80319	3.68945	3.75103	3.61222	3.88659
BAA15589	yeaN	1.28972	1.39713	1.19209	1.486	1.13541	1.15408	1.49497	1.35532	1.70134	1.41069	1.37924
BAA15386	rsxE	1.63294	1.56703	1.4563	1.35982	1.22561	1.32449	1.4101	1.42828	1.40552	1.61798	1.32673
BAA15650	holE	2.53184	2.5337	2.31798	2.45736	2.42186	2.28133	2.28266	2.24313	2.47421	2.40454	2.34096
BAE76401	ompG	0.27886	0.462834	0.107112	0.110827	0.205359	0.286949	0.173272	-0.322013	0.32926	0.440602	-0.0082451
BAA35946	potA	2.33701	2.25711	2.57825	2.49581	2.3938	2.6739	2.52693	2.48924	2.61094	2.49587	2.40369
BAA16563	mltB	1.5885	1.81125	1.8322	1.93973	1.90395	1.71059	1.87136	1.80177	1.72992	1.78569	1.85773
BAE78384	ytjC	2.26865	2.21685	2.27576	2.04318	2.17496	2.13558	2.16416	2.25868	2.27546	2.22774	2.10833
BAE76884	ygdL	2.11869	1.97451	1.99508	2.02205	2.10512	2.02353	2.04033	2.08722	2.08928	2.1706	2.07348
BAE78375	lplA	1.59259	1.58401	1.83926	1.67046	1.67107	1.69588	1.68265	1.72212	1.72294	1.72147	1.65652
BAA15977	fruK	0.961982	1.27545	1.41689	1.35966	1.20199	1.25403	1.34743	1.16418	1.44871	1.32226	1.42443
BAE78378	radA	2.04341	1.99319	2.07127	2.18619	2.18465	2.09397	2.10211	2.15535	2.20875	2.10061	2.14468
BAA35516	iaaA	2.68391	2.44913	2.59261	2.46302	2.60418	3.08226	2.7634	2.66031	2.77707	2.46994	2.57409
BAE78128	yjdI	1.06811	1.22352	0.924207	1.12689	1.09011	1.1623	0.940041	0.857471	0.616866	0.68902	1.1306
BAE76975	zapA	3.18682	3.13839	2.70689	2.76013	2.64116	2.59059	2.70769	2.80054	2.68228	2.75175	2.78881
BAE77825	yhhN	2.21998	2.2124	1.82324	2.05339	2.09426	1.92225	2.04461	1.94188	1.98726	2.0418	2.05007
BAE78214	cpdB	1.75072	1.63009	1.93354	1.94785	1.86282	2.07566	1.84098	1.97127	1.89373	1.98345	1.90325
BAE77477	rhtB	1.87162	2.04411	1.94509	1.97813	1.57372	1.98622	1.8684	1.79502	2.08833	1.84941	1.94229
BAE77102	yqiJ	0.555727	0.309361	-0.0221164	0.421699	-0.101563	0.408462	0.111393	0.413226	-0.100998	0.040307	0.43448
BAE76967	ygfF	1.22196	1.38133	1.57696	1.5358	1.60284	1.55754	1.58879	1.3938	1.4067	1.39898	2.34
BAE76371	insC	1.03072	1.09173	1.05436	0.993879	1.02397	1.11476	1.02946	1.01528	0.934074	0.942722	1.15228
BAE76512	ydjO	0.934329	1.05941	0.553366	0.587501	0.340258	0.655627	0.8661	0.698468	0.680501	0.662623	0.679811
BAE77735	glyS	2.68186	2.58667	2.99649	2.75651	2.85068	2.80002	2.72231	2.75812	2.78886	2.90243	2.70197
BAE76306	folD	2.28212	2.24159	2.59128	2.49121	2.60632	2.67729	2.50983	2.51633	2.6486	2.58087	2.49393
BAA15508	yniC	2.1883	2.18325	2.26856	2.26539	2.28734	2.32333	2.21132	2.25914	2.27476	2.31406	2.14568
BAA35837	mdoC	1.69355	1.42576	1.33915	1.26314	1.33231	1.39202	1.39179	1.47773	1.52649	1.5811	1.25326
BAE77634	yicL	1.74966	1.74209	1.67266	1.73563	1.63447	1.64597	1.68165	1.79187	1.71906	1.73299	1.64392
BAA15621	sdaA	1.73048	1.79733	1.6417	1.68806	1.65497	1.64024	1.74084	1.68502	1.73418	1.78311	1.94487
BAE77902	aroB	2.66744	2.63338	2.83535	2.80686	2.88796	2.76978	2.76991	2.80474	2.84967	2.85838	2.78514
BAE77016	yggU	1.37569	1.47081	1.74824	1.71152	1.82171	1.85085	1.7334	1.73002	1.78463	1.76771	1.73827
BAA36031	umuC	0.896337	1.39177	1.47927	1.30098	1.54919	1.32916	1.40302	1.37564	1.52488	1.30534	1.31011
BAA35915	ycfP	2.33409	2.54425	2.61987	2.63263	2.57224	2.70425	2.6203	2.59977	2.66319	2.63105	2.59473
BAA15062	ydcN	1.51194	1.62135	1.65578	1.36479	1.26747	1.12536	1.32554	1.465	1.53084	1.51986	1.43636
BAE76635	yeiH	1.24163	1.31352	1.25948	1.42093	1.04991	0.997579	1.27467	1.26874	1.24709	1.2516	1.42862
BAA16110	nuoH	2.2944	2.29947	2.7656	2.46487	2.47345	2.5091	2.5492	2.55061	2.57569	2.41446	2.47638
BAE77167	tdcA	0.499255	0.571255	0.304559	0.237907	0.765305	0.402729	0.48776	0.256613	0.313723	0.358118	0.476218
BAE77688	lldR	1.18968	1.33879	1.47849	1.41892	1.54574	1.48461	1.5599	1.48157	1.42807	1.51801	1.39746
BAB96586	talB	3.30399	3.24659	3.34776	3.21043	3.31525	3.27756	3.29598	3.3442	3.37096	3.32578	3.29045
BAE76039	rluA	1.83453	1.74746	1.74771	1.70429	1.81371	1.75366	1.70319	1.74032	1.76102	1.82458	1.67604
BAA35488	mntR	2.12007	2.2289	2.45312	2.4169	2.3504	2.38613	2.43051	2.44757	2.50081	2.38238	2.47308
BAE77979	rpmC	1.79977	1.74795	2.27271	1.9786	2.1899	2.15807	2.02607	2.19229	2.23752	2.08457	2.16558
BAA35444	ybhL	2.52064	2.56361	2.30974	2.31416	2.20427	2.41251	2.27245	2.2922	2.39027	2.32633	2.33335
BAA16420	hscA	2.2006	2.23377	2.27855	2.2451	2.4501	2.25561	2.27206	2.27464	2.15033	2.34488	2.26924
BAE76624	yeiA	0.683937	1.00521	1.40474	1.12206	1.23502	1.18051	1.17432	0.91608	1.19677	1.03406	1.10461
BAE77555	atpG	3.37516	3.24891	3.78677	3.57606	3.80216	3.67237	3.60456	3.51219	3.57974	3.71146	3.56072
BAE78125	dcuB	0.567085	0.759607	0.634037	0.277234	0.712565	0.482846	0.502971	0.31332	0.974004	0.538825	0.633448
BAE77669	rfaK	1.82063	1.77375	1.7382	1.8499	1.90532	1.88398	1.77704	1.84959	1.77445	1.63507	1.75454
BAE77526	ilvD	2.3949	1.91759	2.20369	2.19976	2.28678	2.21118	2.21557	2.10787	2.25095	2.24816	2.09462
BAA15030	ydcF	2.27006	2.31534	2.23267	2.29803	2.18749	2.3558	2.21437	2.19478	2.37075	2.29046	2.26079
BAA16064	yfaU	0.653415	0.9656	1.0647	1.0189	1.04133	0.954439	1.05119	0.978522	0.873271	1.0998	1.03685
BAA14946	dbpA	1.67798	1.94322	1.84229	1.97459	1.69895	1.91855	1.87542	1.88184	1.88416	1.75069	1.95441
BAA16500	yfjB	2.07428	2.13562	2.08351	2.14421	2.10166	2.02789	2.10911	2.12765	2.02681	1.94057	2.06671
BAA77855	fabZ	2.9967	2.88802	3.15125	3.06517	3.15073	3.18292	3.13745	3.18788	3.18591	3.16127	3.0852
BAE77883	feoA	2.21504	2.34716	1.80022	2.273	2.10076	2.1367	2.26491	2.15968	1.89604	2.26254	2.21538
BAE76521	ynjB	1.60291	1.64999	1.50728	1.72444	1.5995	1.60844	1.64211	1.59077	1.64244	1.69103	1.65996
BAE76491	ydhL	1.65359	1.80644	1.48936	1.52965	1.43022	1.23068	1.45691	1.64007	1.60076	1.35516	1.68068
BAA35702	ycbX	1.92957	2.04219	2.19752	2.19146	2.05631	2.22961	2.05395	2.20679	2.28456	2.31008	2.14123
BAE77348	fabR	2.58205	2.45866	2.53966	2.42056	2.62775	2.34831	2.47042	2.61137	2.55063	2.51934	2.48635
BAA16444	hcaB	1.00223	1.24026	1.12106	1.18413	1.11064	1.07542	1.10924	1.04633	1.04685	1.0546	1.13456
BAE77319	hupA	1.63426	1.55927	1.21288	1.02765	0.9746	1.02421	1.05148	1.01784	1.21373	1.12499	1.15932
BAE78057	aphA	1.64511	1.44327	1.43888	1.68782	1.47352	1.4157	1.59759	1.75734	1.36402	1.57914	1.59546
BAE77550	atpB	3.19659	3.10547	3.41219	3.30002	3.48813	3.35245	3.3111	3.18985	3.24301	3.3478	3.26357
BAE76956	prfB	4.06419	4.05393	4.20651	4.18011	4.27208	4.24074	4.19302	4.1887	4.2337	4.34565	4.11565
BAA36008	minE	2.27239	2.07114	1.93898	1.80665	1.7651	1.8859	1.71729	1.95919	1.96463	1.90934	1.88334
BAE76625	mglC	0.839979	0.60083	0.753973	0.467261	0.753314	0.846748	0.795058	0.93539	0.716579	0.851206	0.700074
BAE76860	gudX	0.6247	0.704476	0.50358	0.462628	0.58773	0.482846	0.660424	0.446454	0.578034	0.608415	0.744114
BAA15091	ydcC	-0.414825	0.254622	0.0709486	-0.148915	0.198989	0.0773928	0.0539431	-0.843194	0.389427	0.0364621	-0.0349241
BAA15071	ydcU	1.07552	1.07953	0.895991	0.953983	0.848122	1.01168	0.959902	0.919474	1.01617	0.83234	0.923842
BAA77862	yaeR	1.51162	1.5998	1.40238	1.45641	1.43292	1.26186	1.36208	1.53673	1.44654	1.32776	1.56721
BAE77160	tdcG	0.987402	0.950631	0.748629	0.956784	0.850143	0.534809	0.827442	0.806375	0.739301	0.910269	0.781989
BAA15559	pncA	2.08592	2.02567	2.21227	2.2323	2.19486	2.3094	2.20215	2.22351	2.27768	2.29086	2.15296
BAA35289	leuS	2.50195	2.58147	2.79661	2.6708	2.72602	2.86248	2.6959	2.75338	2.88682	2.7967	2.6738
BAE77589	yidD	1.08794	0.86083	1.36122	1.14897	1.32845	1.29697	1.16243	1.27021	1.16339	1.25687	1.00649
BAE76731	yphG	0.568605	0.572649	0.396231	0.639275	0.560337	0.569116	0.576803	0.419619	0.370493	0.491405	0.592818
BAA15558	ansA	2.0962	2.04662	2.18293	2.25448	2.22067	2.33544	2.27186	2.22595	2.25901	2.27444	2.19168
BAA35239	rnk	2.37227	2.20171	2.23857	2.19063	2.21065	2.21899	2.16981	2.31874	2.41447	2.68972	2.22265
BAA35851	mdtG	0.890166	1.07739	1.09215	1.07844	0.919522	0.982062	1.08399	0.880064	1.08734	1.04353	1.23649
BAE76746	rseC	2.09443	2.16392	1.87713	2.03373	2.05775	1.88646	2.12811	1.94678	2.08211	2.03042	2.00867
BAE77138	alx	1.60092	1.38969	1.42436	1.25755	1.49924	1.32567	1.22476	1.39475	1.40362	1.72446	1.24102
BAA36097	narI	0.836508	1.07787	0.684555	0.806814	0.429018	0.798557	0.795186	0.77997	1.03832	0.781689	0.808726
BAA35936	lolC	2.21011	2.01592	2.15702	1.97507	2.04153	1.98141	2.01708	2.19466	2.2499	2.12566	2.0371
BAA15175	ydeQ	0.380303	0.440506	0.520488	0.3345	0.0462512	0.304866	0.503885	0.418372	0.247516	0.601805	0.330652
BAE78060	uvrA	1.84562	2.09719	2.18739	2.14972	2.15561	2.17538	2.2054	2.11714	2.16992	2.21836	2.1836
BAE77829	ftsY	2.03664	1.98109	2.23851	2.17274	2.16732	2.24652	2.18031	2.27006	2.12556	2.15443	2.19436
BAE77246	rpoN	2.50746	2.61938	2.57775	2.68361	2.7478	2.57568	2.66713	2.66669	2.58443	2.62843	2.65195
BAA15210	ydeA	1.20103	1.28894	1.02081	1.21377	1.05323	0.95576	1.0712	1.04852	1.15714	1.09969	1.2857
BAE76857	chpR	1.40695	2.75721	2.74569	2.64234	2.63306	2.60559	2.63025	2.69302	2.58259	2.58491	2.71674
BAA35487	ybiP	1.15945	0.957363	1.13911	0.861372	0.976747	1.08425	1.00459	1.10187	1.20638	1.17039	0.930665
BAA35700	pyrD	2.39213	2.49325	2.54065	2.56721	2.46693	2.63354	2.52472	2.57544	2.71526	2.56749	2.4513
BAE76449	yddJ	-1.08043	0.362981	-0.927399	-0.994413	0.233908	-0.561481	-0.613261	-0.983444	-0.596883	-0.618112	-0.423152
BAA16264	insL	0.523441	0.310814	0.257908	0.440284	0.479492	0.467217	0.23442	0.58924	0.376715	0.461048	0.394491
BAE77029	yqgA	1.31444	1.28698	1.09708	1.08103	1.06609	0.973226	1.17702	1.20652	0.795283	1.02432	1.07372
BAE78263	idnO	0.815988	0.875923	0.679611	0.681169	0.981176	0.85363	0.834972	0.797162	0.70853	0.941624	0.79481
BAA16107	nuoK	0.848261	0.99756	1.70914	1.25177	1.18609	1.10875	1.18761	1.36459	1.52241	1.27339	1.18255
BAE77216	yhbC	2.5695	2.44804	2.65781	2.53855	2.64679	2.5831	2.5782	2.64604	2.64277	2.68335	2.58144
BAE77277	degQ	1.86449	1.97645	1.94735	2.10623	2.18036	2.15068	2.05906	1.95624	1.91614	2.10027	2.08343
BAA15429	ribC	2.64881	2.65957	2.53945	2.58065	2.64558	2.54206	2.57363	2.56807	2.68451	2.57709	2.59126
BAE76494	gloA	2.87614	2.77854	2.93681	2.71769	2.89287	2.93618	2.78844	2.90497	2.92546	2.83132	2.76318
BAA35625	serS	2.75242	2.76839	2.83749	2.91219	2.82362	2.94	2.83162	2.91261	2.94013	2.88592	2.85886
BAE77838	livG	2.10236	1.9385	2.33821	2.26194	2.25607	2.23896	2.23541	2.31034	2.18844	2.29041	2.16602
BAA16575	yqiG	0.62405	0.711246	0.364752	0.478537	0.574485	0.456842	0.607406	0.531375	0.529929	0.733276	0.383151
BAA35666	ycbC	1.5004	1.51392	1.58412	1.59672	1.38971	1.65956	1.59371	1.54799	1.68785	1.52534	1.61256
BAA15985	yejA	1.61356	1.18444	1.21586	1.37211	1.02973	0.916634	1.10512	1.56951	1.049	1.10036	1.31854
BAB96679	ampD	1.844	1.83828	1.85261	1.81618	1.7234	1.77831	1.79159	1.75796	1.77301	1.73363	1.76952
BAE76968	gcvP	1.80418	1.82655	2.4525	1.95004	2.29214	2.3551	2.13135	2.13649	2.19886	2.11833	3.16387
BAA35440	moaB	2.12221	2.39939	2.34835	2.44258	2.39644	2.58122	2.4068	2.35156	2.39159	2.50157	2.4028
BAE77891	hslR	1.75794	1.72163	2.06447	2.00993	2.16751	2.06039	2.00255	1.91991	1.98829	2.02116	1.93155
BAE76528	yeaM	1.53926	1.64388	1.57557	1.66843	1.62332	1.55201	1.64136	1.64207	1.54683	1.55931	1.55312
BAE78155	frdD	1.6032	1.55705	0.922768	1.16728	0.964841	0.630803	1.05952	0.98717	1.17981	1.0533	1.23093
BAA35433	ybhH	0.269022	0.369868	0.2258	-0.0948869	0.058308	0.595743	0.268139	-0.148752	0.25908	0.528021	0.102546
BAE76662	ccmC	1.30662	1.12738	1.16231	1.07546	1.1434	1.00916	1.08407	1.13685	1.38748	1.05731	1.15909
BAA16491	rplS	3.09193	2.87999	3.0995	2.91446	3.02996	2.99331	2.918	3.0053	3.05092	3.03032	2.93614
BAB96722	dksA	3.36183	3.12767	3.08697	3.09631	3.06562	3.01205	3.11007	3.16622	3.14549	3.36487	3.10591
BAE77353	argC	2.52193	2.51492	2.95811	2.83156	2.97616	2.9355	2.85881	2.81223	2.81667	2.85876	2.69288
BAE76173	ykiA	1.67043	1.76408	1.62963	1.7407	1.45997	1.59817	1.64067	1.83474	1.69171	1.71951	1.69683
BAE77517	trxA	3.66878	3.30483	3.17724	3.153	3.18208	3.06427	3.07881	3.35933	3.24833	3.26711	3.23779
BAA16559	alaS	2.77921	2.76166	2.80776	2.8482	2.98613	2.73527	2.86284	2.88832	2.90242	2.8359	2.86575
BAE77663	rfaS	1.67422	1.64062	1.48775	1.63041	1.74103	1.66116	1.62855	1.70205	1.63489	1.49123	1.62316
BAE77448	dsbA	2.89158	2.69856	2.96065	2.84067	2.88929	2.80673	2.80254	2.88999	2.97769	2.99896	2.85125
BAE78169	yjeE	1.48868	1.67528	1.77368	1.74537	1.72948	1.73637	1.73183	1.74434	1.70629	1.63574	1.79495
BAE76035	yaaY	2.12746	1.87384	1.59789	1.26275	1.51999	1.33915	1.22842	1.47848	1.60217	1.69087	1.52549
BAE77827	yhhL	1.5475	1.27521	1.09271	1.25151	1.36847	1.24688	1.17205	1.40433	1.27269	1.37042	1.35619
BAE77291	mreD	1.99245	1.82637	1.87223	1.8468	2.02664	1.68157	1.90907	1.93382	1.9061	1.96908	1.84445
BAE77621	ivbL	1.90824	1.79731	1.19354	1.06172	1.31307	1.03209	0.614068	1.29611	1.18773	1.4043	1.10761
BAE77364	fsaB	0.581727	1.88745	2.03983	2.13291	2.11456	2.04479	2.0521	2.09304	2.05882	2.0721	2.04027
BAA15002	paaJ	1.17443	1.37373	1.3673	1.28009	1.22074	1.41396	1.30822	1.34867	1.22926	1.21595	1.32572
BAE76689	yfcO	2.14949	2.05428	1.71301	1.81176	1.85379	1.70129	1.77696	1.86889	1.72829	1.85124	1.8455
BAE77026	mltC	1.91845	1.85997	2.02599	2.11832	2.21009	1.91535	2.02658	2.0676	1.98842	2.04122	2.0044
BAE76849	ygcU	0.692873	0.871619	0.685347	0.845499	0.901447	0.822432	0.935245	0.59217	0.774763	0.936655	0.79794
BAA16330	eutH	0.432212	0.63999	0.177241	0.475986	0.44728	0.0982614	0.529376	0.378994	0.245032	0.422014	0.446006
BAE77894	nudE	2.55001	2.50242	2.59132	2.50249	2.66561	2.52375	2.52943	2.63643	2.52353	2.58839	2.51084
BAE76885	mltA	2.18138	2.20534	2.30244	2.19285	2.36774	2.19844	2.25538	2.28017	2.28317	2.24097	2.19858
BAA15800	yeeJ	0.997528	1.10684	1.00713	1.13531	1.09778	1.03703	1.08134	1.10915	0.939875	0.959925	1.08036
BAA16343	narQ	1.5515	1.54711	1.41943	1.47971	1.62773	1.3969	1.43981	1.43057	1.49316	1.40989	1.47311
BAE77856	gntK	0.862568	1.29225	1.01478	1.04429	1.3568	1.24238	1.29783	1.01838	1.34431	1.34806	1.14601
BAE76171	aroM	1.95927	2.07026	2.03741	1.97459	1.98032	1.9517	2.00677	2.12618	1.91816	1.99809	1.91452
BAE77369	metF	3.06764	2.98164	3.34321	3.02407	3.03964	2.96583	3.0607	3.17836	3.1939	3.17023	3.07554
BAA15641	yebS	1.61051	1.61342	1.35819	1.42637	1.33154	1.37037	1.45852	1.49825	1.37675	1.40047	1.43657
BAE76796	hycG	1.07331	1.11713	1.09767	0.976262	1.16762	0.943847	1.00249	0.98498	0.931586	0.946024	1.10708
BAA15685	yecM	2.1228	2.17376	2.15115	2.26349	2.18297	2.19775	2.19791	2.20197	2.12664	2.243	2.18863
BAA35716	sulA	2.16466	2.58518	2.59967	2.40762	2.51179	2.41998	2.5121	2.41606	2.4977	2.4664	2.49272
BAA36010	minC	2.5896	2.53156	2.58979	2.66781	2.66296	2.55264	2.61479	2.75785	2.68993	2.63951	2.6322
BAE77553	atpH	3.04288	2.9576	3.36643	3.16034	3.39925	3.31643	3.1938	3.09992	3.16613	3.27087	3.14632
BAA15127	sfcA	2.60163	2.70393	3.02654	2.84809	3.10655	3.02119	2.97424	2.82003	3.06007	2.82542	2.84928
BAE77473	metR	2.35903	2.61608	2.90684	2.4803	2.43296	2.44991	2.45825	2.6125	2.72079	2.53998	2.3602
BAA15343	ydgI	1.3648	0.995881	0.71895	1.05362	1.13295	0.752934	1.04703	1.06491	0.870605	0.970777	1.10567
BAA16414	yfhJ	1.96658	2.0108	2.06552	2.05118	2.25227	2.10991	2.07379	1.96079	1.96782	2.14807	2.04012
BAE77134	ygjO	1.79484	1.68654	1.80416	1.83298	1.72109	1.74332	1.80217	1.6802	1.74881	1.89796	1.67046
BAE76545	yobA	2.52674	2.61209	2.36705	2.56218	2.52132	2.43291	2.52211	2.60909	2.51494	2.50826	2.48238
BAA35438	ybhK	1.98629	1.87199	1.83234	1.89546	1.87851	1.93418	1.8382	2.01178	1.91418	1.86322	1.89149
BAA16275	xapA	0.462279	0.569114	0.675303	0.584319	0.50148	0.441064	0.571319	0.414157	0.365222	0.681651	0.651879
BAE77098	yqiC	3.2343	3.14021	3.1015	3.11188	3.10886	3.09344	3.13354	3.09115	3.07546	3.0972	3.04919
BAE76969	gcvH	2.28136	2.18699	2.84301	2.48926	2.8491	2.94148	2.68236	2.61427	2.76957	2.63287	3.69962
BAE77212	truB	2.09716	2.0662	2.17321	2.1832	2.26356	2.18137	2.23429	2.20887	2.20976	2.25807	2.18048
BAE77943	slyX	2.49612	2.40254	2.00757	2.08483	2.08822	2.02969	2.11719	2.10481	2.05969	2.26724	2.10855
BAA16467	yfiF	2.5054	2.41201	2.49281	2.53453	2.53425	2.45716	2.51268	2.51232	2.65615	2.59576	2.48025
BAE77061	yqhA	2.82376	2.62906	2.61202	2.60174	2.66454	2.51446	2.69847	2.69989	2.58697	2.7804	2.61689
BAB96640	leuD	3.05844	3.37734	2.97955	3.26805	3.33271	2.95446	3.24611	3.24313	3.12479	3.15926	3.21716
BAA15401	ydhH	1.8937	1.92968	1.76909	2.02386	1.98778	1.80413	1.91919	1.90386	1.93868	1.8364	1.94675
BAA15577	yeaD	1.94034	1.98817	2.51776	2.53951	2.3918	2.58828	2.49319	2.42428	2.51886	2.38292	2.4027
BAE77220	glmM	2.40032	2.35502	2.55872	2.59063	2.67803	2.50944	2.58028	2.54885	2.49206	2.5933	2.54068
BAE78373	deoD	2.72528	3.54299	3.60884	3.67228	3.75866	3.76078	3.64578	3.61376	3.52896	3.6238	3.66188
BAA15980	yeiP	2.74028	2.56293	2.6314	2.69227	2.80775	2.75058	2.73229	2.64521	2.80939	2.63119	2.60067
BAA15732	pgsA	2.49768	2.49202	2.42	2.29914	2.40355	2.28675	2.31825	2.42065	2.41571	2.35079	2.33941
BAA15313	ynfG	0.882329	1.10568	1.23051	1.23312	0.967076	1.01739	1.16069	0.964936	1.40757	1.06724	1.07209
BAE76525	yeaC	2.09832	1.96816	2.30307	2.18636	2.02482	2.11471	2.14848	2.21965	2.12331	2.19547	2.20075
BAA14891	ycjT	0.447848	0.541195	0.475186	0.532623	0.333271	0.719668	0.658359	0.458847	0.598641	0.497883	0.554825
BAA16299	cysP	2.86598	2.75307	0.475186	0.532623	0.333271	0.719668	0.658359	0.458847	0.598641	0.497883	0.554825
BAA15671	ruvB	1.88787	2.11503	2.12164	2.22242	2.25095	2.0766	2.20945	2.11477	2.09656	2.23762	2.17968
BAB96698	cueO	1.92807	2.05134	2.30242	2.50089	2.35149	2.4171	2.45492	2.58237	2.67377	2.46261	2.45725
BAA15564	ydjI	0.61959	0.960567	1.01213	1.16951	0.974745	1.10061	1.20045	0.942624	1.16415	1.14662	1.0185
BAE77218	yhbX	0.989942	0.914764	0.817658	0.846348	0.792165	0.63334	0.782426	0.817573	0.819621	0.685721	0.739
BAE78119	adiA	0.651885	0.83569	0.7199	0.785281	0.97249	0.97695	0.88313	0.667974	0.824962	0.911916	0.785533
BAA15593	yeaS	1.16573	1.26803	0.996332	1.11624	1.22725	0.910818	1.19328	1.05074	1.03412	1.06737	1.14662
BAE77116	rpsU	4.29395	3.86046	3.48757	3.28804	3.39703	3.24281	3.37858	3.49761	3.49392	3.5748	3.36894
BAA16498	grpE	3.23878	3.05704	3.28906	3.14621	3.33967	3.16118	3.19873	3.24396	3.28784	3.24719	3.11838
BAA15546	ynjC	1.20514	1.03349	0.637839	0.827621	0.859191	0.655279	0.898144	0.765901	0.776079	0.906843	0.989009
BAB96720	pcnB	2.65825	2.70867	2.92477	2.87206	2.9368	2.93274	2.88148	2.8817	2.87256	2.88015	2.82111
BAE77709	yiaT	0.624745	0.771812	0.256891	0.488572	0.43002	0.825804	0.595488	0.314989	0.342539	0.585904	0.575152
BAA16296	cysA	2.78641	2.71463	2.77783	2.74734	2.71899	2.75655	2.77379	2.7718	2.74084	2.71298	2.72369
BAB96716	ecpD	-0.506061	0.392759	0.0289249	0.275587	0.239914	0.429942	0.476368	-0.268176	-0.0605511	0.239785	0.464228
BAA16472	kgtP	3.09365	3.11441	3.36045	3.15244	3.10436	3.05918	3.13758	3.32255	3.053	3.31868	3.18324
BAA35414	zitB	1.69429	1.72777	1.72281	1.57989	1.56242	1.70846	1.57414	1.61389	1.79881	1.59678	1.64542
BAA16427	suhB	2.7787	2.50722	2.57267	2.57837	2.58978	2.51007	2.55188	2.62107	2.58131	3.00706	2.53467
BAA15683	torY	-0.11432	0.408386	0.0849218	0.191664	0.346096	0.184909	0.287018	0.227751	0.141574	0.398103	0.0725924
BAE77092	ygiA	-0.359598	-0.896276	-0.604201	-0.994413	0.0425768	0.159541	0.222059	0.295926	0.0431416	-0.552418	-0.445776
BAE77561	pstC	1.77023	1.74622	1.91672	1.83989	1.50559	1.79521	1.8466	1.94251	1.79935	1.99903	1.79923
BAA15443	ydhX	0.450488	0.862483	0.876917	0.659087	0.815597	0.834906	0.824126	0.719461	1.01756	0.70251	0.688624
BAE77060	yghZ	1.44334	1.46469	1.51082	1.39619	1.61332	1.34201	1.44199	1.40423	1.31009	1.28728	1.40237
BAE77320	yjaG	2.37947	2.3094	2.32438	2.27846	2.36164	2.23152	2.318	2.40118	2.36803	2.24173	2.31014
BAE77237	yrbD	2.1438	2.06557	2.34773	2.38881	2.47592	2.25606	2.37648	2.32984	2.28707	2.4122	2.34004
BAE76343	fepC	1.07259	1.126	0.96532	1.51066	1.33332	1.39087	1.59543	1.4811	0.984898	1.36714	1.2084
BAA14844	sapD	1.81009	1.86627	1.87874	1.89754	1.81279	2.1482	1.85048	1.97147	1.98454	1.91094	1.90718
BAE76234	ybaZ	2.34848	2.35697	2.31367	2.23214	2.24295	2.15703	2.21162	2.4207	2.40743	2.35108	2.34612
BAA35602	infA	3.53363	3.17212	3.06596	2.81593	2.79457	2.90442	2.87979	3.06957	3.1324	2.96203	2.84569
BAE77556	atpD	3.3627	3.23841	3.69221	3.49589	3.71248	3.5757	3.52463	3.42421	3.49196	3.63496	3.4878
BAE77706	yiaW	0.411625	0.318569	-0.350123	-0.254215	0.0991873	-0.553583	-0.32339	-0.147464	-0.565649	-0.108428	0.0157891
BAA35269	ybeM	1.16461	1.35641	0.994034	1.29466	1.11771	1.15941	1.15672	1.25015	1.10592	1.19999	1.21374
BAE76346	ybdA	1.24878	1.29104	0.940863	1.48045	1.32066	1.25383	1.50446	1.39304	0.732706	1.19502	1.11201
BAE77531	yifE	3.1928	2.82833	2.39769	2.20546	2.3673	2.32417	2.38379	2.37597	2.55467	2.53094	2.32619
BAA35738	hyaB	0.413491	0.449933	0.546063	0.807838	0.425849	0.56092	0.488627	0.35529	0.558464	-0.0924486	0.723785
BAE78251	argI	2.19416	2.3104	2.86136	2.70584	2.81915	2.93544	2.69057	2.73382	2.70874	2.70928	2.65895
BAB96735	btuF	1.44623	1.43192	1.66523	1.72082	1.77159	1.71578	1.79918	1.74775	1.63672	1.67981	1.68233
BAA35952	phoP	2.56063	2.54768	2.9261	2.84904	2.64734	2.9588	2.81707	2.93353	2.85084	2.89565	2.8495
BAE78080	yjcO	2.26866	2.21293	2.3007	2.29311	2.32701	2.35187	2.27135	2.34407	2.2387	2.28727	2.30135
BAE77854	yhhW	1.77957	1.8025	1.70204	1.85181	1.91394	1.91781	1.82141	1.87681	1.83251	1.76622	1.85335
BAE76982	argK	0.415329	0.584774	0.201514	0.266587	0.446364	0.566784	0.626426	0.291975	0.112038	0.274039	0.495954
BAB96600	dapB	2.13912	1.88823	2.39208	2.11953	2.4613	2.46247	2.32012	2.14522	2.28088	2.41696	2.15483
BAA15367	uidB	0.158761	0.570738	0.802405	1.04244	0.729683	0.819409	0.991565	0.671698	0.909334	0.630327	1.09458
BAA15192	ydeW	0.702178	0.940746	1.19863	1.20593	1.14386	1.30837	1.13936	1.07723	1.07101	1.05147	1.08134
BAA35334	ybfE	2.17578	1.97605	2.11018	1.95291	2.11451	2.1679	1.98532	2.11343	2.19956	2.14771	2.01222
BAE76887	argA	2.80428	2.72265	3.09436	2.96127	3.04455	3.09366	2.96324	2.94366	2.89938	3.00865	2.80159
BAE77073	sufI	2.05917	2.04307	2.18034	2.13532	2.20988	2.04413	2.12984	2.10194	2.09807	2.16503	2.12841
BAE76178	sbcD	1.61344	1.56395	1.59172	1.52706	1.41253	1.6927	1.53965	1.57046	1.71734	1.60234	1.5556
BAA35627	dmsB	0.683937	0.834576	1.01971	1.0619	0.764791	1.07641	0.975347	0.939293	1.33501	1.03798	0.989105
BAA16492	trmD	3.11306	2.99978	3.42461	3.32667	3.45796	3.44516	3.36045	3.29148	3.32241	3.43022	3.29621
BAA35887	flgG	3.01434	0.720208	0.806011	0.713784	0.57605	0.88398	0.744666	0.74987	0.84205	0.82255	0.815784
BAA35384	gltA	2.85954	3.20623	3.67482	3.28647	3.48567	3.69678	3.45558	3.37061	3.52386	3.33749	3.28024
BAE77222	ftsH	2.97949	2.88912	2.94003	2.91638	3.06383	2.81814	2.96443	2.939	2.8456	2.92337	2.87415
BAA16282	ligA	1.75483	1.81887	1.77122	1.97847	2.05607	1.95459	2.00651	1.95173	1.97374	2.15272	1.91018
BAA15228	dcp	1.95404	2.04772	2.12532	2.20398	2.13302	2.23929	2.15178	2.16776	2.20044	2.13091	2.16537
BAA35852	lpxL	2.11133	1.97024	2.00255	2.07645	1.99227	2.14822	2.04093	2.22974	2.07075	2.09996	2.05853
BAE78012	yrdA	2.46594	2.29427	2.51529	2.57188	2.61885	2.44444	2.55392	2.68324	2.73289	2.57173	2.53614
BAA77887	yafT	0.961601	0.405278	0.435971	0.532119	0.574389	0.810795	0.316341	0.701832	0.60395	0.666768	0.51817
BAE76027	yaaW	0.828894	0.822196	0.684965	0.592737	0.515291	0.871181	0.864935	0.566355	0.569512	0.613586	0.766396
BAE77381	rraA	2.9939	2.97083	3.04864	3.03664	3.13466	2.88622	3.02624	3.02664	3.04589	3.04169	3.08011
BAE77028	speC	2.08396	1.8155	2.05303	1.98679	2.11304	1.94017	2.04924	2.02891	2.12242	2.23319	1.96904
BAE76192	yajI	1.41839	1.4738	1.34013	1.19515	1.2995	1.38464	1.33864	1.21137	1.28817	1.36091	1.3169
BAA36073	kdsA	2.82467	2.73211	2.78246	2.73806	2.67428	2.91792	2.78788	2.89718	2.91953	2.98281	2.80536
BAA16355	dapA	3.04974	3.08757	3.08887	3.11954	3.24823	3.10538	3.12415	3.11893	3.15909	3.14294	3.08713
BAA15802	amn	2.35412	2.48516	2.46981	2.43415	2.39693	2.35325	2.38933	2.46534	2.43193	2.46345	2.3973
BAB96617	apaH	1.94399	2.08004	2.06822	2.19955	2.16481	2.10488	2.1859	2.13769	2.04906	2.00017	2.21355
BAA16490	yfiB	1.78016	1.67847	1.79265	1.80765	1.70939	1.64254	1.73959	1.64415	1.78359	1.71617	1.82677
BAE77554	atpA	3.42993	3.3174	3.69022	3.4695	3.70617	3.55352	3.51776	3.44041	3.5085	3.6279	3.4834
BAE76423	paaA	0.364551	0.57474	0.70406	0.69991	0.710795	0.938447	0.816067	0.732029	0.897087	0.844391	0.557851
BAE78167	yjeS	1.68486	1.78684	1.82728	1.71052	1.72072	1.72468	1.73749	1.81967	1.69186	1.59258	1.73239
BAA14922	mppA	1.87184	1.88735	2.14894	2.05611	1.96454	2.18629	2.0414	2.17958	2.12026	2.00479	1.94455
BAA15552	selD	2.29081	2.18108	2.43631	2.45276	2.47627	2.41805	2.42283	2.50524	2.39473	2.36706	2.46208
BAE78359	rsmC	2.17347	2.12121	2.08112	2.10691	2.09667	2.03336	2.07842	2.12164	2.14013	2.14756	2.09099
BAA35614	lrp	3.37225	3.4218	3.43463	3.35845	3.4059	3.39258	3.35537	3.35483	3.47909	3.47159	3.29885
BAB96733	yadR	2.74031	2.67574	2.61209	2.42585	2.53537	2.40238	2.47695	2.62797	2.59189	2.65138	2.55959
BAE77525	ilvA	2.38466	1.80496	1.99606	1.95369	2.00061	1.96921	1.97608	1.8827	2.02077	2.04173	1.89093
BAE76572	wcaE	0.143903	-0.0600429	-0.397126	-0.0773999	-0.263588	0.00389099	-0.113102	0.000355295	-0.174978	0.321527	-0.170895
BAB96636	thiP	1.70421	1.27863	0.28581	0.656391	0.656902	0.686828	0.773858	0.718319	0.495547	0.64079	0.681786
BAA36074	chaA	2.36166	2.23278	2.35657	2.32249	2.23363	2.50158	2.33631	2.31857	2.35815	2.43415	2.27094
BAB96590	dnaJ	2.2925	2.28616	2.55765	2.49783	2.65509	2.59079	2.57374	2.49921	2.60682	2.66034	2.46296
BAE77681	yibN	3.06179	2.94739	3.09955	3.04221	3.13552	3.09303	3.07519	3.08441	3.04924	3.11112	3.02042
BAE76482	uidC	0.484652	0.75646	0.802427	0.889835	0.579586	0.868185	1.08166	0.732889	0.83447	0.533857	0.750748
BAE76744	lepB	2.5856	2.49692	2.55125	2.54109	2.65209	2.51837	2.58827	2.5591	2.51226	2.63636	2.53715
BAE77880	yhgA	1.47636	1.45304	1.30509	1.25727	1.23729	1.37133	1.24147	1.34749	1.29739	1.26825	1.28132
BAE76715	eutL	1.12183	1.34022	1.27767	1.34474	1.35232	1.25533	1.30514	1.32945	1.22077	1.37866	1.32157
BAA15480	ihfA	3.05041	3.10658	2.73391	2.65558	2.68961	2.72908	2.7	2.69712	2.67684	2.78164	2.731
BAE78052	yjbO	1.59366	1.61482	1.28694	1.28441	1.31035	1.26824	1.26651	1.25713	1.25504	1.46968	1.20143
BAA16493	rimM	2.99844	2.93958	3.51835	3.37494	3.47719	3.40557	3.42681	3.3956	3.40471	3.50359	3.39691
BAA16162	dedD	2.26032	2.12089	2.24642	2.2406	2.31989	2.16792	2.23819	2.28876	2.1952	2.22545	2.23811
BAE76043	htrE	0.48321	0.468596	0.215303	0.0942659	0.128237	0.160817	0.369911	0.303501	0.143783	0.321204	0.17157
BAB96599	rihC	1.33923	1.25664	1.74755	1.19746	1.73995	1.58864	1.46499	1.18728	1.50309	1.53446	1.24173
BAA15898	wcaL	0.786906	0.589113	0.358404	0.699396	0.500138	0.637799	0.63173	0.557214	0.563172	0.475474	0.500316
BAE77497	hemD	1.8575	1.87552	2.06408	2.02044	2.06552	1.99973	2.02323	2.06268	1.9573	1.86934	2.00402
BAA15468	ydiS	0.348731	0.478392	0.257079	0.239501	0.290458	0.319377	0.204201	0.232012	-0.062762	0.151607	0.512654
BAA35695	ycbS	0.678098	0.67715	0.709825	0.641676	0.622503	0.805389	0.589756	0.710074	0.825907	0.722365	0.739131
BAE78092	rpiR	1.95962	1.75963	1.96158	1.85136	1.86472	1.80271	1.86339	1.99077	1.85031	1.68432	1.89802
BAE77828	yhhF	2.10265	1.90363	1.94625	2.06355	2.18351	1.98537	1.99273	2.16635	2.08445	2.05061	2.02062
BAE76481	ydgH	2.06222	2.17909	2.32233	2.3375	2.29153	2.37586	2.29172	2.30148	2.41927	2.32955	2.38015
BAA15594	yeaT	1.91677	1.98389	2.01789	2.07252	1.98962	2.0178	2.13744	2.1278	2.01103	1.96229	1.9448
BAA15143	ddpX	1.05631	1.25453	1.36352	1.45749	1.32301	1.67705	1.52614	1.31955	1.40168	1.16044	1.27076
BAB96635	thiQ	1.83126	1.47018	1.03526	1.23788	1.11797	1.14902	1.29858	1.1702	1.0322	1.22335	1.23427
BAB96597	fkpB	2.13344	2.21467	2.45907	2.38046	2.44781	2.43361	2.34114	2.41613	2.37574	2.43928	2.39398
BAE77814	nikD	0.880231	0.633007	0.475491	0.275759	0.435636	0.945095	0.537667	0.401969	0.466998	0.461701	0.8099
BAE76407	ydaO	2.10661	2.12696	2.24593	2.24791	2.23717	2.34848	2.26602	2.24888	2.41985	2.23984	2.1635
BAA35398	mngB	1.07966	1.28422	1.21777	1.27078	1.31387	1.36308	1.32072	1.2558	1.23238	1.28639	1.31874
BAA77884	yafS	2.02667	2.05284	1.9811	1.93103	1.91059	2.03086	1.90708	1.9922	2.01043	1.98756	1.95476
BAA35731	yccV	2.89574	2.82241	2.54768	2.59114	2.46967	2.46548	2.61593	2.56791	2.6796	2.62306	2.60226
BAA15089	yncI	0.834291	1.23878	1.42082	1.35051	1.29255	1.46749	1.50212	1.19829	1.49766	1.31971	1.21794
BAB96595	ileS	2.58825	2.67696	2.8566	2.79535	2.91215	2.83623	2.81352	2.84718	2.85824	2.84145	2.80092
BAE77874	malP	1.81386	2.18745	3.23717	3.17029	2.91791	3.43613	3.09252	2.78197	2.99189	2.55177	2.96979
BAE77870	rtcR	1.01476	1.03602	0.946595	0.986274	1.13511	1.10532	1.03966	0.883161	0.983127	0.981517	0.982559
BAE77003	yqgC	1.76058	1.63627	1.90387	1.5293	1.81658	1.36936	1.45134	1.74543	1.82757	1.78646	1.65767
BAA35691	ssuA	0.270454	0.439038	0.632154	0.41229	0.699748	1.34716	0.585847	0.54954	0.64119	0.608134	0.510046
BAA15849	yefM	1.79188	1.97093	2.0647	2.08695	2.03762	2.13916	2.01544	2.00729	2.00972	2.00141	2.08318
BAA15624	manX	2.50345	2.49201	2.98888	2.79687	3.2597	2.92022	2.93561	2.63932	2.78481	2.84018	2.68802
BAE76649	yejH	1.52457	1.40176	1.53197	1.48463	1.42741	1.37164	1.4727	1.62956	1.43532	1.43523	1.45139
BAA15592	yeaP	2.25681	2.20281	2.40825	2.23192	2.1848	2.27437	2.25154	2.40362	2.35711	2.29755	2.26226
BAA77873	rcsF	2.52992	2.58723	2.60673	2.51715	2.59329	2.48467	2.49324	2.57856	2.65278	2.67512	2.56273
BAA35354	kdpB	0.744576	0.754612	0.511076	0.668832	0.56393	0.821611	0.577858	0.581888	0.678211	0.319894	0.75948
BAE77998	yhdN	1.8799	1.98711	1.76359	1.92898	1.79958	1.78707	1.86454	1.82847	1.83144	1.86497	1.88524
BAE77895	mrcA	1.85054	1.78182	1.96009	1.87189	1.94687	1.87831	1.91688	1.89363	1.91102	1.86273	1.85159
BAA35446	ybhM	1.14377	1.18525	1.117	0.952817	0.728275	1.09028	1.08732	0.955152	1.05898	0.999964	0.810867
BAE76653	yejM	2.17306	2.08664	2.0314	2.05396	1.98021	1.90608	2.02154	2.07431	1.89827	1.96285	2.01657
BAE76506	pheM	2.02288	2.11823	2.02137	2.08736	1.99611	1.78647	1.99865	2.06194	2.07922	2.27009	2.06323
BAA16375	hyfG	0.815634	0.835456	0.678605	0.799873	0.754736	0.714065	0.831637	0.75611	0.713012	0.657042	0.79864
BAA15625	manY	2.2891	2.35203	2.691	2.4487	2.91859	2.56026	2.61509	2.4025	2.55519	2.57177	2.39506
BAA35432	ybhD	0.639713	0.950367	1.00035	0.756689	0.913648	1.02497	0.912822	0.733698	1.06081	1.18256	0.866096
BAE77199	yhbO	1.27069	0.970436	0.645222	0.785438	0.64714	0.676059	0.710548	0.760569	0.415826	0.924785	0.839619
BAA15191	ydeV	0.963597	1.16523	1.21157	1.23261	1.13623	1.27391	1.25334	1.15953	1.09819	1.19222	1.20901
BAE76675	yfbW	0.427066	0.536041	-0.138191	0.357627	0.0209237	-0.416491	0.31133	-0.012743	0.370973	0.448842	0.34948
BAE77653	dfp	2.24865	2.1738	2.19737	2.1469	2.14689	2.25448	2.21104	2.21443	2.2737	2.246	2.17521
BAE76239	hha	2.39921	2.30258	2.46119	2.33417	2.42519	2.41754	2.31001	2.42951	2.34381	2.32046	2.32254
BAE76655	insH	-0.251348	-0.174661	-0.619172	-0.710774	-0.309543	-0.939769	-0.218106	-0.64424	-0.198054	-0.454689	-0.480987
BAA16297	cysW	2.46667	2.27906	2.29487	2.1723	2.22966	2.15827	2.25216	2.2415	2.19865	2.21442	2.31885
BAE78135	cadB	0.149031	0.120429	-0.164269	-0.109894	-0.015749	0.174279	-0.365263	-0.06343	-0.0380629	-0.101845	0.0513678
BAE77086	parE	2.10961	2.16834	2.22504	2.33975	2.44043	2.3125	2.36668	2.30329	2.33051	2.3624	2.25776
BAA15485	infC	3.8229	3.72439	3.75206	3.71487	3.77839	3.74909	3.76656	3.78861	3.74365	3.77475	3.70211
BAA15447	ydiF	0.5077	0.641362	0.471551	0.640763	0.502215	0.493423	0.597164	0.506912	0.636583	1.09882	0.484411
BAA35816	ycdY	2.33589	2.37138	2.62149	2.408	2.5007	2.63066	2.43643	2.58146	2.66378	2.54188	2.43879
BAE76236	ylaB	1.62476	1.5909	1.55421	1.52401	1.51226	1.52865	1.51406	1.53025	1.56363	1.40273	1.46808
BAB96615	kefC	1.4229	1.16507	1.26889	1.52877	1.33123	1.31632	1.31656	1.5752	1.24174	1.27475	1.44361
BAA15278	ydfC	1.03985	0.973477	0.79686	0.822343	2.66731	0.624813	1.11562	0.851643	0.809444	1.08237	0.813526
BAA35405	tolA	2.06866	2.03058	2.32372	2.2229	2.26849	2.36771	2.2726	2.31401	2.34021	2.21807	2.23358
BAE77019	yggM	0.809662	0.676922	0.457752	0.688656	0.444619	0.593417	0.606863	0.914579	0.574716	0.595882	0.729523
BAE77124	ygjH	0.69284	0.910493	0.621646	0.96806	0.660352	0.766722	0.875512	0.710818	-0.0509024	0.574256	1.1008
BAA15682	torZ	0.818494	1.00289	0.92247	1.00637	0.977379	1.01766	0.958102	0.923745	0.85556	0.895209	0.982161
BAA15285	rspA	0.961733	3.6613	3.98215	3.91635	3.82992	3.87068	3.94325	3.91337	3.96031	3.79979	3.8205
BAE77055	hybC	1.03597	1.12023	1.16482	1.07267	1.15996	1.07839	1.06353	1.0384	1.17226	0.967069	1.05427
BAA77854	lpxD	2.97557	2.92441	2.93466	2.76661	2.90392	2.7808	2.83725	2.87551	2.94514	2.88047	2.83131
BAA14956	sieB	0.971141	1.26043	1.12569	1.03926	0.598914	1.0652	1.07521	1.05993	1.2186	1.28911	1.04326
BAE77272	sspA	3.00715	2.88716	2.92856	2.836	2.80879	2.77226	2.88664	2.93502	2.81637	2.91376	2.85078
BAA15360	fumA	2.45465	2.47191	2.85128	2.65832	2.8765	2.8445	2.77536	2.74304	2.78779	2.74936	2.62412
BAE76263	copA	1.99331	2.4253	2.57562	2.69287	2.59918	2.46115	2.66778	2.67938	2.97533	2.51578	2.74364
BAE77064	exbB	2.46859	2.40201	2.0893	2.64059	2.50916	2.33674	2.63692	2.64149	1.81808	2.3526	2.44501
BAE76672	yfaZ	1.75274	1.32011	1.51742	1.41636	1.63723	1.51423	1.50714	1.1184	1.53617	1.54931	1.45808
BAE76151	ykiB	0.137188	-0.344223	-0.927399	0.517946	-0.0317418	-0.167503	0.386301	0.673152	0.207384	0.0616728	0.535375
BAE77129	ygjJ	0.0314565	0.0562106	-0.141641	0.00469186	-0.269542	-0.119104	-0.19212	0.0322618	0.145674	0.128269	-0.0659248
BAE76041	nadC	2.07547	2.04169	2.08469	2.02842	2.03497	1.99995	2.00876	2.09625	2.07767	2.09381	2.05078
BAA35406	tolB	2.75819	2.77762	2.86276	2.77323	2.74888	2.85213	2.79064	2.81626	2.92986	2.86989	2.80558
BAA15314	ynfH	1.31876	1.31765	1.26542	1.19846	1.15597	1.15377	1.17138	1.15716	1.52681	1.17154	1.2101
BAE76994	yggF	0.00664326	0.499697	0.613973	0.590098	0.547304	0.625915	0.628722	0.289515	0.465941	0.295077	0.603283
BAA35870	pyrC	2.86303	2.98969	3.01146	3.06512	2.9431	3.12378	2.99914	3.09768	3.15296	2.95672	3.05626
BAA35938	lolE	2.07778	2.01297	2.1751	2.01585	1.99564	2.05276	2.00844	2.13679	2.22923	2.09831	2.07595
BAE78386	creA	2.07702	1.95243	2.24189	2.21172	2.14417	2.4073	2.12049	2.33294	2.23375	2.11609	2.12469
BAA15059	tehB	2.12529	1.86681	2.05546	2.25053	1.85387	2.03451	1.95893	2.3095	2.08359	2.11763	2.22236
BAE77685	cysE	2.40872	2.46609	2.66041	2.65252	2.67581	2.61851	2.64213	2.65047	2.52949	2.57462	2.56977
BAE76487	rsxD	1.813	1.68523	1.6636	1.49623	1.38953	1.54284	1.61154	1.68121	1.60649	1.87348	1.57219
BAA35615	ftsK	2.28652	2.26929	2.43984	2.29016	2.30218	2.36888	2.33849	2.35672	2.41918	2.40571	2.28303
BAE76730	yphB	1.08068	1.09113	1.11676	1.12486	1.01885	1.03826	1.00931	1.11594	0.927881	1.13661	1.10641
BAA16464	yfiK	1.55469	1.48654	1.14608	1.15866	1.2629	1.01512	1.2822	1.205	0.951627	1.21551	1.16755
BAA15206	yneH	1.93416	1.8169	1.90964	1.80838	1.86694	1.86552	1.84912	1.90955	1.96071	1.82709	1.82884
BAE77414	fdhD	1.8928	1.83759	1.82259	1.92048	1.99186	1.67574	1.87013	1.84963	1.95102	1.86856	1.88165
BAE77120	yqjH	1.89352	1.96332	1.88529	2.09063	2.0637	1.86988	2.14068	2.08819	1.6553	2.12069	1.86767
BAA16389	ppk	2.1705	2.29531	2.23978	2.36993	2.30824	2.26053	2.31967	2.31586	2.23365	2.32746	2.31491
BAA35597	macA	1.57442	1.8446	1.8722	1.93324	1.84766	1.98106	1.91071	1.87118	1.97366	1.94285	1.85744
BAE77103	rfaE	2.37278	2.28571	2.38058	2.49486	2.47833	2.42559	2.48554	2.45316	2.40495	2.43507	2.4392
BAE76664	ccmA	1.32423	1.35303	1.23765	1.20871	1.28337	1.10436	1.20744	1.1632	1.49062	1.05409	1.23956
BAA15421	ydhO	2.16535	2.01372	2.12372	2.05882	2.11629	1.9873	2.06091	2.12821	2.11887	1.77841	1.99732
BAA35734	yccK	2.38278	2.21859	2.3814	2.26025	2.38568	2.50162	2.31056	2.4765	2.62396	2.40435	2.27143
BAB96701	can	3.21098	3.09261	2.80822	2.90934	2.98485	2.81083	2.95073	3.06328	2.8849	3.00313	2.93632
BAE77668	rfaZ	1.69038	1.68061	1.53414	1.68659	1.7713	1.69472	1.63843	1.6977	1.66533	1.50138	1.60661
BAA35333	fldA	2.9342	2.89726	2.98658	2.9055	2.88504	3.07847	2.92133	2.9968	3.04986	2.99226	2.90107
BAA15044	trg	1.09699	1.0316	1.03413	1.12381	0.950171	1.10703	0.974743	1.03869	0.984964	0.936095	1.15273
BAA16319	hemF	1.87456	1.80662	1.82055	1.74066	1.77899	1.77173	1.82338	1.83392	1.88697	1.83866	1.77061
BAE77275	yhcM	2.12992	2.04752	2.06056	2.08711	2.23568	1.9719	2.05545	2.06687	2.0795	2.03305	2.04302
BAE76211	cyoB	2.93004	3.15253	3.43637	3.26338	3.28939	3.45201	3.3255	3.07795	3.46431	3.41667	3.32231
BAA16398	yfgL	2.3715	2.43498	2.51726	2.4786	2.53045	2.42115	2.50553	2.43426	2.46517	2.53866	2.49658
BAA15040	ydcA	2.34881	2.13123	2.03689	2.02788	1.89418	2.00145	1.97334	2.26727	2.17198	2.31643	2.10432
BAA15597	yeaW	0.285521	0.561252	0.478647	0.46045	0.345595	0.467332	0.416553	0.381868	0.274826	0.385057	0.494392
BAA14966	stfR	0.671821	0.697147	0.548429	0.616862	0.39463	0.917892	0.622386	0.640055	0.44365	0.520407	0.752148
BAA16272	gltX	2.83691	2.71312	2.76647	2.79934	2.93659	2.83855	2.80734	2.83089	2.8582	2.89439	2.7627
BAA15901	cpsG	0.460552	0.534922	0.466793	0.62423	0.388949	0.640704	0.659122	0.358453	0.263151	0.530819	0.572508
BAA77857	lpxB	2.15515	2.14543	2.20687	2.15748	2.22728	2.24258	2.23509	2.208	2.1478	2.23888	2.18594
BAE77667	rfaY	1.86843	1.84677	1.76223	1.9454	2.06539	1.96638	1.96156	1.95634	1.93752	1.83117	1.86161
BAA15140	ddpC	0.741596	0.935732	0.864022	0.787779	0.843626	0.888062	0.957553	0.761504	0.801125	0.720114	0.749391
BAE76241	acrB	2.36508	2.31376	2.5038	2.59622	2.53835	2.56516	2.47479	2.49673	2.48957	2.62246	2.59061
BAE78353	yjjB	1.31562	1.30994	0.882117	1.05952	0.94897	0.884999	0.90079	0.7772	1.18307	1.08037	1.01179
BAA15992	eco	1.4969	1.74866	1.68223	2.00601	1.91082	1.92477	1.98553	1.92435	1.77042	1.83175	1.97671
BAB96743	map	2.76095	2.62586	2.54583	2.61206	2.66932	2.66463	2.70017	2.7594	2.61574	2.64776	2.64608
BAE77094	ygiC	2.43555	2.48634	2.61732	2.54618	2.73502	2.54005	2.56216	2.54182	2.63592	2.51842	2.44708
BAA35419	galK	1.58738	1.66124	1.96857	1.83513	2.08721	2.26628	2.10504	1.87154	2.09014	1.94082	1.86127
BAA35699	ycbF	0.899817	1.03089	0.965397	1.0053	0.968253	1.11922	1.04935	1.15734	1.05368	0.955867	1.07559
BAA16469	trxC	2.36119	2.37119	2.2977	2.20031	2.30454	2.14574	2.23107	2.28372	2.25052	2.34218	2.17638
BAE77648	dinD	1.16002	1.32175	1.67985	1.45669	1.70657	1.56567	1.56485	1.55495	1.49306	1.39179	1.41037
BAA15785	yedI	1.35894	1.53583	1.50623	1.52573	1.43911	1.48002	1.5278	1.53497	1.46879	1.33798	1.58102
BAE76418	ydaY	0.429686	0.00655298	0.482361	0.302088	-0.126419	0.320909	0.431882	0.58493	0.380601	0.43386	0.578774
BAE77270	dcuD	0.631715	0.510254	0.43667	0.308532	0.468705	0.226144	0.333992	0.268388	0.349272	0.0926371	0.403412
BAE76787	norV	1.01128	0.987492	0.764435	0.98949	0.939201	0.864422	0.915466	0.909008	0.736035	0.634453	0.915032
BAE76243	acrR	1.98152	1.77619	1.93466	1.97508	1.74119	1.85035	1.72586	1.90228	1.82909	1.86581	1.96398
BAA35955	trmU	2.45762	2.50008	2.65903	2.56656	2.51394	2.73571	2.59652	2.63949	2.70625	2.61802	2.56359
BAA35379	abrB	1.27277	1.2213	1.12347	0.896457	0.941539	1.02524	0.913029	0.915422	1.25485	1.07662	0.963691
BAA16381	focB	1.0876	1.08698	0.780967	0.774026	0.811158	0.760789	0.770079	0.704025	0.672525	0.80995	0.944729
BAA16292	pdxK	2.1778	2.08931	2.2639	2.17948	2.16202	2.23338	2.17073	2.24068	2.18703	2.19251	2.1468
BAE77727	xylF	0.856106	0.93137	1.3275	0.712548	0.987071	1.14192	0.93998	0.921847	0.998405	1.08414	0.745067
BAE77109	folB	1.68695	1.69314	1.89279	1.80656	1.92526	1.87463	1.89869	1.87469	1.94736	1.95406	1.81188
BAE77565	bglG	0.563554	0.415202	0.349001	0.174225	0.187007	0.236622	0.377084	0.163935	0.363663	0.326694	0.168776
BAE77268	nanA	1.31204	1.13723	1.56172	1.43285	1.33961	1.55139	1.45784	1.44915	1.49269	1.46292	1.31448
BAA15451	ydiJ	2.32704	2.43725	2.71671	2.71485	2.6987	2.66637	2.62588	2.61414	2.64576	2.54787	2.65767
BAA35740	hyaD	0.481392	0.776414	0.952498	0.883149	0.729431	1.02249	0.945084	0.72134	0.82044	0.755496	1.06028
BAA15404	ydhJ	1.31191	1.36723	1.34468	1.35221	1.34327	1.29899	1.41303	1.28098	1.35494	1.38923	1.19457
BAE77118	rpoD	2.80326	2.70719	2.73964	2.81003	2.85326	2.82109	2.83971	2.82305	2.75536	3.01921	2.77782
BAE77074	plsC	2.15836	2.06609	2.12035	2.15385	2.23244	2.1402	2.13169	2.14432	2.15594	2.2215	2.0762
BAA15100	nhoA	1.1005	0.909573	1.02336	1.05684	0.864168	0.67342	0.856346	1.02933	0.999661	0.94073	1.08828
BAA77859	dnaE	2.11937	2.05524	2.13404	2.17456	2.21792	2.22138	2.22066	2.17442	2.14058	2.24142	2.16012
BAE76847	ygcR	0.00584825	0.283766	0.307679	0.222237	0.546643	0.4833	0.272181	0.0279583	-0.0432369	0.282056	0.236299
BAA35309	ybeX	2.70852	2.86164	2.82602	2.84504	2.93523	2.95864	2.94178	2.9355	2.98512	2.80531	2.8623
BAA15387	nth	1.84154	1.77316	1.82324	1.7727	1.57711	1.84427	1.8248	1.86342	1.72051	2.02575	1.66328
BAE77153	yhaH	2.36909	2.22447	2.17739	2.34372	2.20224	2.12628	2.36867	2.3196	2.02634	2.32937	2.34283
BAE77716	yiaM	-0.273403	0.301408	0.0618551	-0.567829	-0.523009	-0.6362	-0.0995482	-0.312697	-0.953357	-0.0351008	-0.435402
BAE77131	fadH	1.28824	1.3515	1.4067	1.62104	1.53784	1.32496	1.71159	1.4919	1.15021	1.42772	1.36412
BAA14836	yciH	1.95603	1.95674	2.08136	2.004	1.93699	2.01332	2.01048	2.02875	2.13425	2.08704	2.02357
BAE76177	sbcC	1.491	1.57278	1.72251	1.67378	1.57629	1.84467	1.65419	1.70184	1.77517	1.70134	1.65789
BAE77179	kbaZ	0.663124	0.567117	0.852886	0.822251	0.672157	0.901776	0.993161	0.920231	0.830077	1.00668	0.751106
BAB96596	lspA	2.29835	2.25877	2.27824	2.17477	2.32421	2.14346	2.16367	2.2676	2.22526	2.29693	2.27809
BAE76398	ycjN	-0.0146857	0.442122	0.453123	0.0879769	0.499756	0.769913	0.605527	0.0828616	0.700902	0.913768	0.138315
BAE76692	yfcR	0.471493	0.334833	0.155152	0.261895	0.171649	0.45411	0.148249	-0.148066	-0.16229	0.114549	0.205292
BAE76843	ygcN	0.879927	0.628007	0.728452	0.536901	0.616278	0.622209	0.555402	0.650903	0.570977	0.402387	0.62405
BAE78131	yjdO	0.705849	0.887148	0.235645	0.0157808	-0.119058	0.398102	0.247635	0.361093	0.0687178	-0.0861415	0.645864
BAA16502	smpA	3.00597	2.9181	2.43301	2.48551	2.48517	2.29376	2.48243	2.49838	2.5927	2.62012	2.51101
BAE76793	ascB	1.24882	1.28566	1.24619	1.27936	1.27658	1.18118	1.24636	1.21051	1.15697	1.23042	1.20956
BAE77576	yieE	1.77541	1.75278	1.68502	1.7434	1.8069	1.73894	1.72144	1.60559	1.64887	1.59747	1.71534
BAA35420	galT	1.65613	1.74148	1.97517	2.01672	2.24905	2.37496	2.19422	1.94738	2.19228	2.13943	1.97243
BAE77879	bioH	1.72685	1.72328	1.81657	1.86696	1.93571	1.81662	1.83812	1.78863	1.82499	1.77702	1.75654
BAA35626	dmsA	0.591682	0.723589	1.00344	0.963833	0.658984	1.07482	0.930066	0.870121	1.34637	0.789258	1.05525
BAE76198	pgpA	1.98319	2.03484	1.98364	1.90157	1.95303	1.95706	1.8741	2.03313	2.00398	1.94816	2.01313
BAA35833	csgC	2.34212	0.690681	-0.0550425	0.591888	0.597883	0.777316	0.491317	0.652262	0.820916	0.481733	0.552345
BAA15515	chbF	0.711237	0.928897	0.92226	1.02532	0.879992	0.994033	0.871426	0.935479	0.901936	1.18285	1.03341
BAE76863	yqcB	1.61161	1.7025	1.8129	1.88867	1.95112	1.85125	1.91704	1.78027	1.93252	1.78298	1.75702
BAE77852	yhhY	1.7372	1.78042	1.78558	1.8764	1.89798	1.60304	1.75654	1.77704	1.92062	1.7439	1.88978
BAA15806	nac	1.18712	1.30313	1.39467	1.32003	1.30322	1.53762	1.34308	1.05917	1.33437	1.13997	1.343
BAA77875	metI	2.40268	2.49103	2.65499	2.57197	2.56989	2.55966	2.51052	2.61236	2.59828	2.55361	2.52664
BAE78385	rob	2.65706	2.63987	2.72411	2.70961	2.62185	2.70188	2.70244	2.73056	2.64478	2.57392	2.66453
BAE77202	yhbS	1.97217	1.79504	1.75365	1.72353	1.75082	1.59255	1.70799	1.68929	1.6141	1.73667	1.68097
BAE76502	ydiL	0.464555	0.544435	-0.0764741	0.0927375	-0.0934509	-0.273615	-0.0644837	0.287534	-0.0928861	0.389039	0.0221209
BAE76372	yceO	0.583711	-0.304875	0.238929	0.584232	0.398044	0.577477	-0.424701	0.301908	0.810563	-0.128522	0.42557
BAA35739	hyaC	0.0196491	0.28121	0.261694	0.426993	0.280395	0.525361	0.0963782	0.0526386	0.475946	-0.447916	0.321318
BAE76732	yfhK	1.85353	1.84474	1.67877	1.73018	1.78517	1.58076	1.64357	1.67511	1.63652	1.66728	1.70428
BAE76307	sfmA	0.231393	0.433721	-0.22369	0.333155	0.146967	0.460823	0.113464	0.216327	0.0515885	0.118862	0.0785499
BAE77172	garR	1.11987	1.23731	1.30687	1.25283	1.24136	1.1491	1.20301	1.11664	1.24767	1.22278	1.23444
BAA36069	prfA	1.93015	1.92845	2.09899	2.03957	2.15714	2.24164	2.09452	2.09907	2.25711	2.22974	2.05173
BAE77931	argD	2.3055	2.11935	2.68609	2.37357	2.47938	2.60892	2.43754	2.43657	2.42421	2.57473	2.31606
BAE76893	ygdB	0.693739	0.784195	0.589113	0.73943	0.69586	0.580746	0.692992	0.622602	0.326243	0.632077	0.586885
BAE77070	yqhG	0.93898	0.879508	0.638353	0.889128	0.858334	0.692761	0.889602	0.90988	0.682808	0.814493	0.870879
BAA35746	yccC	1.38117	1.4517	1.2032	1.26205	1.21964	1.26241	1.23992	1.27961	1.27798	1.21332	1.31464
BAA35951	phoQ	2.10374	2.11039	2.49989	2.35436	2.19759	2.50882	2.3769	2.4775	2.36458	2.39241	2.33997
BAE77896	yrfD	1.05734	0.977873	1.00321	0.943417	0.839776	0.78433	0.980779	0.905896	0.926523	0.765295	0.926829
BAA15598	yeaX	1.12875	0.962562	0.910327	0.760671	0.788435	0.914896	0.896583	0.840373	0.716599	0.733368	0.912031
BAE78211	ytfF	1.48671	1.35812	1.10696	1.189	1.22605	1.10827	1.18279	1.16734	1.1297	1.24212	1.09325
BAE77546	mioC	2.99179	2.904	3.02655	2.85836	2.93696	2.90863	2.88796	2.99066	2.82341	2.94772	2.85991
BAE76670	yfaQ	0.509545	0.540478	0.542223	0.608786	0.273024	0.472212	0.573353	0.578741	0.311449	0.209242	0.604104
BAA15048	rimL	1.32071	1.43262	1.54906	1.57065	1.41516	1.53419	1.40919	1.52317	1.53272	1.50596	1.60479
BAE77226	dacB	1.94308	1.89123	1.90977	1.91767	2.06353	1.8228	1.89733	1.93963	1.98134	1.8195	1.86136
BAA35643	aroA	2.60279	2.50987	2.87414	2.69009	2.78736	2.86805	2.69367	2.80117	3.0808	2.9434	2.7306
BAE77999	zntR	1.48262	1.73958	1.63042	1.67829	1.54388	1.46241	1.62944	1.52837	1.54589	1.50978	1.66621
BAA35747	etp	0.742778	0.895723	0.777432	0.860624	0.862515	0.823234	0.87565	0.689895	0.980686	0.821749	0.9138
BAA15976	fruA	1.15665	1.34662	1.47094	1.40292	1.29199	1.29383	1.40091	1.25649	1.40505	1.28946	1.47012
BAE76230	glnK	0.391971	0.156673	0.809494	0.314176	0.380563	0.952439	0.196545	0.0714422	0.741207	0.459963	0.544589
BAE76669	yfaP	0.566483	0.622519	0.319454	0.427835	0.170856	0.317381	0.441751	0.276388	0.370391	0.250257	0.675504
BAE77594	recF	1.74965	1.73518	1.86613	1.82898	1.87665	1.85975	1.87826	1.86269	1.7699	1.93656	1.81034
BAE77441	glnG	1.96019	1.90248	2.1933	1.97097	2.13397	2.10417	2.00899	1.83089	2.1065	1.95896	2
BAE77165	tdcC	0.962474	1.15297	0.896642	1.03273	1.11068	0.885116	1.09907	1.02469	0.879169	1.1854	0.992323
BAA15101	yddE	1.94732	1.98862	2.0034	1.94597	1.89178	1.96419	1.91823	2.05426	1.99924	1.97425	1.95315
BAA16055	yfaE	1.78106	1.65803	1.68385	1.47118	1.54154	1.46665	1.52298	1.68373	1.53981	1.57559	1.45492
BAB96584	yaaA	2.25065	2.17411	2.1843	2.16687	2.15166	2.15602	2.19589	2.18902	2.2943	2.16899	2.10575
BAE77900	hofQ	0.666635	0.587554	0.616804	0.576943	0.661678	0.540638	0.549395	0.542663	0.610986	0.42932	0.556019
BAB96680	ampE	1.59837	1.7199	1.72235	1.66976	1.5118	1.62825	1.59546	1.63628	1.65617	1.61374	1.71171
BAE78163	yjeP	1.80054	1.72916	1.6398	1.68506	1.66788	1.58339	1.65368	1.66587	1.68713	1.70669	1.69472
BAE76510	yniB	2.38903	2.36111	2.09844	2.19445	2.20751	2.06553	2.23565	2.3157	2.22817	2.18222	2.19905
BAA15465	ydiP	1.17492	1.26097	1.33891	1.31962	1.15468	1.35053	1.22419	1.33121	1.27352	1.34359	1.22845
BAE77049	gss	2.09378	2.14171	2.07953	2.19826	2.06633	2.09566	2.1397	2.13725	2.15842	2.14931	2.19622
BAA15087	rhsE	0.520981	0.550439	0.539134	0.373454	0.408897	0.76894	0.552186	0.480206	0.604085	0.530982	0.568258
BAE77290	yhdE	1.97062	1.97969	2.23601	2.2181	2.36151	2.22652	2.20555	2.21553	2.13474	2.15871	2.12518
BAE76431	ynbC	0.850875	0.954335	0.986448	0.832494	0.838062	0.906029	0.946606	0.867493	0.9813	0.867282	0.905424
BAA35225	fepA	0.856121	1.22944	0.992618	1.57215	1.41925	1.26866	1.72497	1.50753	0.78601	1.39963	1.29712
BAE76589	yehD	0.403387	0.603128	0.527443	0.366628	0.447997	0.548868	0.292975	0.138876	1.26457	0.533514	0.507216
BAE78078	nrfG	0.737099	0.663832	0.549705	0.683626	0.484273	0.427844	0.251801	0.496879	0.574685	0.247662	0.718239
BAE77113	ttdB	0.19516	0.543659	0.53882	0.435997	0.638884	0.651711	0.685233	-0.0699064	0.789964	0.548311	0.459543
BAA36042	fadR	2.39713	2.29735	2.33727	2.24062	2.19201	2.34779	2.26696	2.40734	2.38818	2.25867	2.26468
BAA15464	ydiO	0.685665	0.919486	0.505187	0.832764	0.778729	0.75329	0.774035	0.76913	0.84016	1.17579	0.609899
BAE78143	yjeH	1.72725	1.72994	1.79275	1.39361	1.48135	1.6372	1.5439	1.57195	1.69159	1.57942	1.65795
BAA35940	cobB	2.21361	2.13694	2.46982	2.36695	2.37829	2.5197	2.37819	2.42062	2.51748	2.41067	2.35088
BAA77886	dnaQ	2.41048	2.41499	2.26623	2.33261	2.26659	2.39949	2.30408	2.35612	2.38657	2.306	2.3076
BAE77171	garK	0.964427	1.11802	1.42576	1.28414	1.36488	1.22408	1.28724	1.31786	1.23744	1.1213	1.22846
BAE78139	cutA	1.91025	1.93325	2.02421	2.15667	2.18659	2.09437	2.09878	2.01469	1.91822	2.03182	2.11406
BAA16494	rpsP	3.45034	3.21335	3.3356	3.12491	3.23632	3.00915	3.16976	3.2454	3.2874	3.3805	3.20825
BAA16020	atoB	0.629989	0.767853	0.707983	0.66825	0.63153	0.675966	0.805254	0.718631	0.488124	0.696995	0.827677
BAA15906	wcaI	0.182783	0.0466291	-0.160042	0.235318	0.220921	-0.0600548	0.0454204	0.0680302	0.110561	0.0669105	0.250177
BAE77444	yihA	2.57791	2.40096	2.52842	2.4498	2.51034	2.45234	2.51769	2.50492	2.58039	2.57012	2.48415
BAE76231	amtB	1.0433	0.928645	0.883997	0.734797	0.628392	1.00692	0.621644	0.606221	0.702708	0.51062	0.945017
BAA35930	ycfT	0.419317	0.579646	0.135295	0.216461	0.223745	0.348009	0.366952	0.133107	0.312356	-0.0408417	0.382588
BAA36051	emtA	2.4777	2.39333	2.50994	2.4889	2.3617	2.58869	2.49246	2.47614	2.64542	2.39978	2.43109
BAA77858	rnhB	1.76148	1.6809	1.85082	1.84265	1.9253	1.8907	1.97755	1.86295	1.86064	1.95047	1.84286
BAA35906	holB	1.72744	1.85603	1.86512	1.83825	1.84074	1.92	1.8319	1.86715	1.93524	1.89755	1.84472
BAA16180	fabB	2.71973	2.70122	3.06869	2.80456	2.84818	2.95696	2.87634	2.7925	3.03545	2.87781	2.83379
BAE76503	ydiM	0.0112454	0.162165	-0.696428	-0.0896856	-0.426389	-0.0964403	-0.246907	0.050539	-0.474279	-0.0803994	-0.0582422
BAE76222	ybaV	1.37685	1.21768	1.41967	1.33368	1.30041	1.49677	1.30645	1.50227	1.30114	1.30688	1.31587
BAA35600	clpS	1.92402	2.23057	2.41165	2.52988	2.52423	2.48092	2.41517	2.41533	2.41181	2.40781	2.52657
BAE77703	selB	2.05243	2.02053	2.1169	2.11334	2.31053	2.18654	2.14967	2.0741	2.17165	2.20414	2.08162
BAE78004	fmt	2.3389	2.33675	2.37211	2.34172	2.51144	2.40424	2.42494	2.39177	2.42173	2.40052	2.34486
BAE77660	rfaQ	2.0293	2.01981	1.97568	2.04489	2.11122	1.97278	2.04893	2.11434	2.00163	1.90409	2.03579
BAA35891	flgK	2.50526	0.975338	0.840976	1.01585	0.796241	1.07804	0.946727	0.933615	1.00523	0.909367	1.06052
BAA14831	ribA	2.49249	2.41803	2.44819	2.48735	2.50219	2.65206	2.51166	2.54614	2.62229	2.50411	2.45234
BAB96660	ddlB	2.27099	2.30033	2.33459	2.28322	2.25779	2.28363	2.28125	2.35524	2.33776	2.31084	2.29974
BAE77869	glpR	2.07446	2.04728	2.10266	2.129	2.2177	2.10887	2.12021	2.12576	2.18673	2.20545	2.12751
BAE77399	yiiM	1.92632	2.01282	2.13452	2.1349	2.05519	1.92123	2.06955	2.10994	2.09781	2.08174	2.10542
BAA16108	nuoJ	1.89853	1.95313	2.56408	2.23092	2.31113	2.43035	2.34284	2.33485	2.32421	2.1438	2.20299
BAE76671	yfaT	-0.507584	-0.355923	-0.793473	-0.45419	0.141154	-0.156534	-0.369469	-0.432103	-0.58079	-0.513974	-1.01182
BAA36070	prmC	1.56821	1.4296	1.58639	1.38578	1.57313	1.51485	1.46662	1.50358	1.71226	1.63342	1.45444
BAA35381	ybgP	0.360755	0.282152	0.00254221	-0.0183518	0.073611	0.374564	0.213503	0.32696	0.28716	-0.00906563	0.523686
BAE76310	sfmH	-0.226174	0.15674	-0.0537354	-0.424079	-0.142046	0.298827	-0.0875024	0.0673254	0.0425072	0.0878693	-0.464005
BAA35617	ycaJ	1.86361	1.82382	2.04863	1.88372	1.86641	1.97882	1.96329	1.94949	2.1024	2.09833	1.93859
BAE77824	zntA	1.34164	1.33226	1.45585	1.33071	1.30216	1.50616	1.49668	1.31282	1.22191	1.26977	1.23014
BAE76347	fepB	1.53296	1.6413	1.35922	1.65043	1.64339	1.56378	1.76064	1.68098	1.22469	1.59735	1.52014
BAE76658	ccmG	1.18097	1.15578	1.18647	1.13661	1.21582	1.09592	1.19208	1.22558	1.33286	1.08565	1.20014
BAE76461	yneG	1.50245	1.43159	1.71653	1.53084	1.59639	1.62121	1.58469	1.7469	1.76418	1.59897	1.61083
BAA35634	ycaM	0.696281	0.560626	0.223644	0.401177	0.153063	0.544937	0.418773	0.480095	0.441798	0.431085	0.603757
BAA35499	ybiR	1.24383	1.16913	1.27901	1.10194	1.03351	1.27999	1.18372	1.26525	1.23347	1.11928	1.22607
BAA15498	thrS	3.00538	3.05416	3.20836	3.13176	3.19884	3.24129	3.19401	3.17471	3.221	3.10655	3.11005
BAE78054	dnaB	2.31962	2.30204	2.42997	2.32587	2.38276	2.37448	2.33873	2.43238	2.39829	2.37715	2.3676
BAE77714	yiaO	-0.276915	0.119991	0.487592	0.151089	0.203461	0.614093	0.243023	0.19049	0.427605	0.765801	0.0426116
BAE76220	hupB	1.58828	1.45539	1.37062	0.766215	1.16129	0.529095	1.0776	1.20295	1.20448	1.28644	1.15046
BAA15001	paaH	0.439902	0.494594	0.552665	0.654357	0.483457	0.537951	0.676663	0.388744	0.585903	0.256947	0.637983
BAE77624	uhpA	2.24517	2.22876	2.29355	2.23237	2.38811	2.17928	2.21396	2.2384	2.2446	2.30604	2.24969
BAE77468	ubiE	2.5151	2.52632	2.68475	2.61949	2.79477	2.76991	2.68959	2.68283	2.66484	2.63598	2.56243
BAA16415	fdx	2.051	2.1003	2.22451	2.18558	2.37023	2.15041	2.12122	2.22576	2.12642	2.26156	2.21968
BAA14811	topA	2.57706	2.58064	2.66891	2.7591	2.61121	2.78822	2.67032	2.70423	2.88567	2.75784	2.65887
BAA35485	rhtA	1.36401	1.28982	1.45213	1.43472	1.14191	1.36091	1.28046	1.38169	1.51128	1.28082	1.41991
BAA16442	hcaF	0.620105	0.809497	0.672981	0.896221	0.671203	0.122454	0.643199	0.46964	0.614796	0.570527	0.632893
BAE78003	rsmB	1.9565	1.95775	1.97592	2.02177	2.11586	2.10952	2.07722	2.02392	2.0353	2.01078	2.03363
BAE76845	ygcP	0.821632	0.87525	0.933056	0.782343	0.707312	0.924062	0.715478	0.810145	0.822116	0.834498	0.822883
BAE77122	aer	1.49403	1.45298	1.37699	1.59631	1.46798	1.4245	1.53081	1.46019	1.26375	1.42204	1.4669
BAB96609	caiT	0.126736	0.00505239	-0.0765823	-0.145931	-0.13315	-0.367821	-0.215107	-0.097665	-0.243509	-0.451689	0.0844821
BAA35285	cobC	1.37577	1.42201	1.5689	1.51878	1.59563	1.61917	1.57132	1.53281	1.60851	1.67949	1.49045
BAE77566	bglF	0.865512	0.624118	0.650853	0.590453	0.599206	0.702156	0.405948	0.641458	0.629332	0.658298	0.714972
BAE76193	ybaD	2.04709	2.09346	2.25733	2.09148	2.21813	2.31956	2.18868	2.18566	2.23053	2.19837	2.20428
BAA35232	ybdN	0.596049	0.711124	0.528855	0.7645	0.63405	0.866385	0.543684	0.473591	0.638806	0.54585	0.682479
BAA35265	crcA	1.18404	1.45909	1.19799	1.47116	1.24023	1.17364	1.36534	1.52989	1.35506	1.24635	1.36283
BAE78165	rsgA	2.50881	2.57639	2.66593	2.73568	2.76666	2.76554	2.75099	2.73439	2.76962	2.6566	2.71124
BAE77063	exbD	2.51784	2.38808	2.13718	2.62902	2.50553	2.37385	2.62221	2.66493	1.95053	2.40707	2.42177
BAE77643	spoT	2.37868	2.42884	2.52546	2.6252	2.65364	2.64045	2.63804	2.57444	2.57863	2.59013	2.57496
BAE77331	htrC	1.15005	1.14157	1.1958	1.27515	1.17007	1.25312	1.14029	1.23982	1.21395	1.35002	1.10839
BAA35905	tmk	1.88923	2.0093	2.01966	1.99456	2.03833	2.05624	1.99286	2.05323	2.11932	2.08463	2.01802
BAE76444	yncD	1.47064	1.45242	1.58512	1.55444	1.47091	1.56175	1.51868	1.68696	1.57018	1.51023	1.5464
BAE76373	yceQ	1.39117	1.3883	1.69409	1.42153	1.55382	1.56895	1.47197	1.47933	1.70171	1.57994	1.49256
BAA35288	rlpB	2.33927	2.39383	2.48351	2.35971	2.37495	2.5032	2.38173	2.4322	2.56325	2.52043	2.40063
BAE78011	yrdB	1.52835	1.32406	1.43828	1.47162	1.52628	1.21475	1.38428	1.58417	1.50848	1.39528	1.52969
BAA16188	prmB	2.44954	2.50029	2.56123	2.49041	2.51471	2.50608	2.49779	2.49921	2.49271	2.55356	2.50692
BAA14996	tynA	0.749623	0.889152	0.758628	0.854852	0.726413	0.909497	0.823526	0.815733	0.880418	0.716932	0.878984
BAB96604	caiE	0.822855	0.81968	0.670166	0.475878	0.653613	0.86652	0.681307	0.475072	0.628601	0.76645	0.786038
BAE77857	gntU	0.881036	0.930861	0.754888	0.891294	1.11618	0.957756	1.0462	0.812712	1.02354	1.14048	0.789603
BAE78144	groS	3.18773	2.98273	3.37308	3.20448	3.41312	3.44322	3.28211	3.25553	3.38081	3.35431	3.14139
BAA15482	pheS	2.58265	2.69733	2.87178	3.01111	3.06151	3.07307	2.92548	2.88204	3.00242	3.10638	2.8597
BAE76870	exo	1.70929	1.61203	1.62062	1.53698	1.58375	1.4781	1.60781	1.57291	1.57309	1.50799	1.56121
BAE78177	yjeT	1.23016	1.04954	1.11706	0.833759	0.639673	0.841986	0.852629	1.32102	1.2672	1.11501	0.90816
BAA14838	yciT	2.38857	2.39651	2.25929	2.31413	2.27829	2.37502	2.26127	2.39049	2.45474	2.29451	2.35319
BAA35427	modA	1.69746	1.68179	1.79378	1.91904	1.85007	2.05067	1.93746	1.978	1.77482	1.74644	1.83693
BAA15809	cobS	0.630113	0.729362	0.667091	0.662908	0.64545	0.633275	0.627206	0.482644	0.629602	0.635301	0.598007
BAE76789	hypF	1.12393	1.09189	1.09997	1.17298	1.05108	1.10224	1.10181	1.08089	1.04278	1.05331	1.22395
BAE76040	coaE	2.01744	1.9395	1.76516	1.83978	1.9227	1.9055	1.80796	1.94852	1.90064	1.79607	1.87503
BAE76711	yfeX	2.45347	2.27873	2.31386	2.4276	2.37479	2.40157	2.43108	2.38699	2.47847	2.51162	2.36344
BAE77498	hemX	2.0201	2.03433	2.30565	2.32673	2.33523	2.3365	2.27738	2.32886	2.17179	2.16965	2.28235
BAE77206	yhbW	2.07238	2.07631	1.92998	2.18227	2.08683	1.85971	2.08051	2.18722	1.88953	1.92477	2.11408
BAA35613	trxB	2.97874	2.92473	2.76985	2.88382	3.07669	3.06697	2.9737	2.88763	3.08766	3.10903	2.86201
BAA35287	holA	1.98157	2.10667	2.31139	2.19683	2.20827	2.31773	2.23569	2.25584	2.32636	2.31253	2.19053
BAA14941	abgR	1.44038	1.39079	1.65895	1.60188	1.44655	1.67389	1.54276	1.61294	1.57142	1.51962	1.43817
BAE78356	bglJ	1.01403	1.03228	0.69705	0.952281	0.759199	0.620104	0.996727	1.11808	0.616142	0.965768	0.950816
BAE77631	yicM	1.40488	1.28123	1.13947	1.33207	1.19663	1.4015	1.13456	1.37396	1.25534	1.53916	1.34278
BAE77375	priA	1.71904	1.75758	1.8167	1.78652	1.67952	1.72951	1.76541	1.7588	1.77787	1.83997	1.74456
BAE78148	yjeK	2.14665	2.09501	2.20622	2.10412	2.16069	2.07441	2.09864	2.25359	2.20381	2.05859	2.12624
BAB96581	thrC	2.92368	3.04392	3.1441	3.0977	3.17521	3.33666	3.0992	3.16122	3.12878	3.36827	3.05771
BAA36072	ychA	2.13533	2.14432	2.08081	2.06872	1.99386	2.15371	2.07512	2.23034	2.13651	2.15639	2.10407
BAE78172	miaA	2.86173	2.70709	2.83743	2.8551	2.77612	2.90548	2.83152	2.8404	2.80106	2.79636	2.84681
BAB96748	frr	3.35535	3.26127	3.31118	3.29761	3.31618	3.33421	3.28626	3.34076	3.28833	3.34751	3.30216
BAE77139	sstT	2.15519	2.0358	2.14993	2.38081	2.19589	1.89181	2.24902	2.43145	2.10688	2.04455	2.21039
BAA35910	hinT	2.67669	2.73384	2.68344	2.60298	2.55347	2.50937	2.58295	2.61955	2.69088	2.59414	2.63031
BAA15919	udk	2.25341	2.12782	2.04955	2.07297	2.1433	2.17935	2.06279	2.16432	2.01249	2.16335	2.02997
BAA16320	yfeG	1.19806	1.38097	1.20439	1.37843	1.36204	1.21479	1.28283	1.22848	1.13194	1.27253	1.36357
BAE76370	insD	0.906952	0.460122	0.249083	0.436786	-0.00645466	0.499585	0.193724	0.351652	0.341413	0.365111	0.338813
BAA35320	nagA	1.89297	1.91376	1.93394	1.97475	1.99516	2.09945	1.98968	1.88673	2.06985	2.08256	1.93876
BAA15686	argS	2.40831	2.43342	2.54267	2.53257	2.54646	2.59147	2.55102	2.51269	2.50035	2.53819	2.47415
BAE77885	greB	2.17911	2.12403	2.06471	2.03076	2.17171	2.10694	2.06566	2.05372	2.12148	2.07955	2.02441
BAE77332	rpoC	2.98038	3.02852	3.21105	3.13738	3.2107	3.12231	3.17245	3.14999	3.18013	3.57666	3.13834
BAE76725	yfgG	2.8562	2.75342	2.36895	2.39866	2.39261	2.07424	2.3291	2.52638	2.35404	2.37649	2.42214
BAE78120	melR	1.14169	1.32425	1.26289	1.29787	1.43082	1.25003	1.33791	1.29715	1.13066	0.945821	1.25574
BAA16462	yfhA	1.51991	1.51326	1.56493	1.56445	1.67493	1.56471	1.55894	1.5663	1.45562	1.60688	1.60414
BAA16521	ygaF	1.47938	1.90062	1.98682	1.95116	2.08094	1.88091	1.92745	1.91794	1.92218	1.7469	1.93196
BAA35674	aspC	2.50714	2.64683	3.19205	2.78227	2.73514	2.99434	2.76291	2.79704	3.05398	2.94097	2.81209
BAE78121	melA	1.07416	1.12637	1.01069	1.06356	1.38346	1.03124	1.0015	1.00261	0.971759	0.901083	1.0101
BAA35707	uup	2.13507	2.193	2.26062	2.33812	2.25106	2.47967	2.32052	2.34548	2.38798	2.32714	2.29277
BAE77126	ebgA	0.680812	0.56891	0.770599	0.763504	0.733809	0.805626	0.759613	0.760033	0.584754	0.508855	0.626447
BAE76745	lepA	2.62091	2.61319	2.64099	2.69422	2.80608	2.68834	2.73818	2.67262	2.67319	2.77525	2.6314
BAA14907	ycjG	1.81686	1.9983	2.04143	2.06339	1.84869	2.14204	1.99651	2.07217	2.00863	2.00184	2.07268
BAA35943	potD	2.76463	2.72711	3.11461	3.03338	2.86575	3.24876	2.95373	2.97948	3.01538	3.13654	2.97941
BAE77712	sgbH	0.61718	0.721572	0.867393	0.496742	0.449328	0.81164	0.745475	0.539385	0.876829	0.937768	0.579882
BAE76910	araE	1.25608	1.31571	1.46865	1.31594	1.57395	1.43112	1.53015	1.14315	1.36379	1.30207	1.32116
BAE77666	rfaJ	1.77564	1.75788	1.51325	1.77356	1.90347	1.76251	1.7335	1.79178	1.75478	1.67052	1.72908
BAA15561	ydjF	1.67442	1.66146	1.76948	1.65731	1.68306	1.66839	1.66756	1.7241	1.6532	1.69037	1.61388
BAA16287	cysZ	1.92307	1.72883	1.57801	1.66938	1.62038	1.53915	1.61637	1.75461	1.64158	1.73796	1.71625
BAE77572	yieI	0.833917	0.564474	0.996656	0.731102	0.600596	0.758297	0.312441	0.681697	0.766657	0.819917	0.715131
BAA14992	feaB	1.38273	1.53838	1.44512	1.61836	1.36796	1.60713	1.54225	1.59083	1.5854	1.54749	1.62258
BAA14801	yciO	1.92095	2.11495	2.19404	2.18199	2.03903	2.42471	2.14939	2.14046	2.16396	2.09512	2.13591
BAB96637	tbpA	2.34492	2.02391	1.36596	1.76593	1.67562	1.58384	1.73648	1.5697	1.61676	1.71906	1.57939
BAA15442	ydhU	0.537915	0.781217	0.580047	0.719743	0.473567	0.515262	0.546333	0.564221	0.76506	0.634331	0.652593
BAA35413	pnuC	2.26433	2.31675	2.45987	2.26711	2.2481	3.03599	2.34846	2.38535	2.40356	2.43674	2.24156
BAA15547	ynjD	1.19326	1.28889	1.01694	1.2232	0.978762	0.976821	1.16538	1.10828	1.01576	1.04477	1.14078
BAA14775	oppA	3.03355	3.73277	3.58171	3.89368	3.78021	3.86029	3.77442	3.68839	3.82862	3.78324	3.72278
BAA36098	ychS	-0.153145	0.0903337	-0.927399	-0.994413	-0.520268	-0.524291	-0.670759	-0.305298	0.018873	-0.424882	-1.01182
BAA15588	yeaL	1.67008	1.46918	1.63923	1.4706	1.25827	1.3276	1.49886	1.51121	1.54746	1.47293	1.51037
BAA15907	nudD	-0.362113	-0.105849	-0.634506	-0.274396	-0.52574	-0.939769	-0.98755	-0.167645	-0.650997	-0.950643	-0.500603
BAA35899	fabH	2.35609	2.43103	2.75343	2.7266	2.61982	2.77731	2.74959	2.68585	2.81016	2.73183	2.72374
BAE76210	cyoC	2.33194	2.5845	2.96954	2.74681	2.78828	2.9635	2.82953	2.55389	2.95732	2.88553	2.82762
BAE77187	agaI	0.568741	0.547347	0.717113	0.6677	0.545405	0.662369	0.381697	0.557623	0.451442	0.739277	0.59386
BAE78023	pepE	1.4836	1.2489	1.32198	1.27582	1.93981	1.28694	1.46231	1.24152	1.66202	1.30205	1.37541
BAE77876	gntT	1.31318	1.36427	1.25476	1.26355	1.15474	1.27062	1.37303	1.18787	1.27343	1.51319	1.16
BAE76349	entE	0.842291	1.16963	0.871971	1.66501	1.39196	1.39947	1.81968	1.4994	0.63365	1.36275	1.22115
BAB96659	murC	2.29839	2.36674	2.44243	2.38764	2.41146	2.37544	2.37731	2.46296	2.45716	2.43836	2.41002
BAA35958	icd	3.25422	3.36094	3.81956	3.4903	3.56249	3.83397	3.56722	3.60178	3.62439	3.74386	3.61877
BAA16271	yfeD	1.8233	1.46953	1.66682	1.55687	1.52165	1.47562	1.58208	1.84496	1.69523	1.56738	1.66432
BAA35331	fur	3.24508	3.16893	3.23415	3.14273	3.1107	3.1827	3.1119	3.22453	3.20199	3.19125	3.12137
BAE76034	insA	1.28476	1.08574	1.25886	1.14106	1.2601	1.05574	1.23783	1.30011	1.09805	1.2718	0.844682
BAA35504	ybiW	0.725445	0.731389	0.58596	0.549916	0.499924	0.654237	0.555277	0.576061	0.520798	0.659652	0.567345
BAE77114	ygjE	0.876129	0.750672	0.51814	0.769756	0.650841	0.512701	0.546222	0.503932	0.637559	0.472954	0.573642
BAA16431	hcaT	1.67683	1.42809	1.4908	1.39721	1.50424	1.34365	1.42612	1.33976	1.39982	1.44996	1.40257
BAA15470	ydiD	0.753436	0.667392	0.574495	0.550235	0.615771	0.605172	0.420648	0.607803	0.359113	0.560488	0.550231
BAE76830	iap	1.68107	1.57601	1.62281	1.58345	1.70299	1.55812	1.54147	1.67508	1.58813	1.53599	1.51608
BAE78205	yjfZ	0.814457	0.881057	0.869495	0.718919	0.805927	1.10896	0.905559	0.83893	0.963689	0.954648	0.871648
BAE77283	aaeB	0.865205	0.892914	0.742456	0.825913	0.842439	0.648353	0.80932	0.805434	0.525837	0.772791	0.781414
BAE78367	yjjV	1.09139	1.17826	0.915163	1.09841	0.851517	0.857589	0.772663	1.0002	0.717659	0.775762	1.12196
BAA15317	ynfK	1.6748	1.70678	1.38807	1.54242	1.46233	1.35797	1.48102	1.43561	1.76889	1.50191	1.47504
BAA15450	ydiK	2.07967	2.00565	1.79504	1.88528	1.88224	1.73732	1.85854	1.81085	1.87316	1.83332	1.87897
BAB96642	leuB	2.80344	3.22255	2.88286	3.28958	3.34597	3.0412	3.24962	3.16591	3.02783	3.04396	3.15766
BAA35697	ycbU	0.628958	0.715982	0.741394	0.811422	0.598511	0.744472	0.655625	0.649963	0.847739	0.806694	0.587067
BAA14855	sapA	1.83709	1.85695	1.89013	1.9371	1.828	2.23138	1.86076	1.95206	2.02177	1.96188	1.88039
BAE76308	sfmC	-0.319078	0.144011	0.0580099	-0.584403	-0.0804859	0.0849334	-0.00306371	-0.654856	0.0415979	0.170126	-0.314399
BAE77507	rffA	1.72545	1.61684	1.79442	1.75421	1.92706	1.792	1.82089	1.84982	1.79575	1.83477	1.81623
BAA35451	ybhR	1.48093	1.48317	1.47205	1.83123	1.35626	1.37493	1.45585	1.41478	1.42143	1.37906	1.83155
BAE77722	malS	1.23417	1.2339	2.05849	1.94592	1.26761	2.14038	1.80709	1.57597	1.65262	1.36614	1.69028
BAE76187	yajC	3.19659	2.95443	3.16921	3.10221	3.19321	3.18904	3.0836	3.14606	3.21061	3.18995	3.12213
BAA35663	ycaR	0.848051	0.684628	1.0661	0.644394	0.196766	0.813731	0.824374	0.76174	0.916997	0.616787	0.906098
BAA35383	ybgD	0.14265	0.545967	0.023641	0.274781	0.29368	0.67496	0.413092	0.260013	0.572396	0.673143	-0.139203
BAA14906	tpx	3.651	3.71713	3.39487	3.40831	3.27165	3.32756	3.31315	3.48386	3.64128	3.59712	3.4666
BAE77127	ebgC	0.24473	-0.0399348	0.172467	-0.00780681	-0.0434802	0.184408	0.136002	0.0108987	0.30657	-0.012535	0.331349
BAE78181	rlmB	2.16139	2.12623	2.16536	1.98614	2.11004	2.02412	2.0602	2.11901	2.1688	2.16908	2.01104
BAE76568	yeeZ	2.3426	2.43941	2.44508	2.51976	2.44182	2.3675	2.44883	2.49638	2.48966	2.46561	2.46564
BAB96725	mrcB	1.97435	1.97432	2.03906	1.97211	2.10318	1.97464	1.99608	2.03145	1.99986	2.01824	1.99866
BAA15168	ydeM	0.182628	0.416299	0.428526	0.364818	0.380915	0.566078	0.523116	0.36454	0.614155	0.558075	0.362296
BAE78123	yjdF	1.40798	1.33641	1.38012	1.4367	1.4436	1.27756	1.3061	1.30802	1.42503	1.47853	1.4151
BAE77678	yibQ	1.92996	1.8121	1.91305	1.90096	2.04252	1.88451	1.95395	1.99337	1.88667	1.84951	1.85419
BAE76676	yfbJ	1.16463	1.26299	1.21986	1.0823	0.988004	1.06153	1.17313	1.27635	1.07363	1.11974	1.25636
BAE76822	truD	2.17072	2.04323	2.15145	2.17159	2.22678	2.2233	2.25153	2.27204	2.19137	2.13656	2.17611
BAA15286	speG	2.52821	2.4523	2.58531	2.51676	2.4587	2.64635	2.51307	2.62592	2.63594	2.5471	2.4124
BAA77871	yaeB	1.96335	1.92227	1.90749	1.84446	1.90895	1.81067	1.8556	1.98749	1.99145	2.03364	1.90499
BAA16135	ackA	2.62464	2.68522	2.75061	2.75831	2.79494	2.66906	2.72187	2.62853	2.89175	2.99172	2.69347
BAB96618	apaG	1.78993	1.98637	2.00893	2.03289	2.0419	2.00919	2.08687	2.01927	1.9898	1.93877	2.12511
BAA15418	rnt	2.16051	2.07182	2.10305	2.02846	2.0133	1.97396	1.99138	2.12363	2.05927	2.04604	1.98164
BAA16193	yfcV	-0.489899	0.15143	-0.0365244	-0.256388	0.384029	0.125932	0.125981	-0.460483	0.310563	0.443568	-0.07443
BAE77741	yiaF	2.7354	2.62889	2.97773	2.63357	2.65915	2.65773	2.58737	2.66362	2.59995	2.56473	2.57445
BAA35890	flgJ	2.60789	0.577266	0.535617	0.437094	0.537922	0.660213	0.571939	0.604712	0.67719	0.386293	0.647799
BAE76201	ispA	2.18513	2.20189	2.37681	2.24696	2.33097	2.36467	2.28946	2.38524	2.40159	2.22682	2.2939
BAA14843	sapF	1.70354	1.66563	1.70408	1.7491	1.59685	2.01183	1.61293	1.73238	1.79582	1.65537	1.65705
BAE76352	ybdB	1.00687	1.20442	1.21927	1.58568	1.29538	1.24562	1.64127	1.46015	1.02175	1.34441	1.3941
BAA35441	moaC	1.88038	2.07027	2.14203	2.08839	2.06511	2.16266	2.06465	2.03781	2.15197	2.21061	2.14564
BAE77619	yidF	1.07515	0.935117	0.818555	0.632165	0.841169	0.75689	0.399697	0.687533	0.672325	0.709188	0.67859
BAE76740	pdxJ	2.23119	2.26859	2.35547	2.39038	2.35291	2.38391	2.35566	2.32792	2.30281	2.29584	2.36401
BAE76891	recC	1.69842	1.81062	1.70892	1.7786	1.85929	1.68168	1.81003	1.79123	1.76525	1.76839	1.77357
BAE76513	cedA	2.11707	1.88316	1.65868	1.61468	1.46078	1.55631	1.58117	1.7973	1.64652	1.67791	1.65672
BAA35684	pepN	2.08963	2.36855	2.41958	2.48848	2.37079	2.52267	2.44789	2.41938	2.44348	2.35237	2.46628
BAE78239	treB	1.92546	1.27222	1.51246	1.47053	1.29486	1.29015	1.4381	1.28874	1.54017	1.38869	1.30652
BAA16178	flk	1.90902	1.90058	2.0148	1.96164	2.02761	1.87465	2.00094	1.98649	1.92814	1.96246	1.94419
BAB96641	leuC	2.859	3.25539	2.97954	3.3327	3.39913	3.0729	3.2989	3.22831	3.10244	3.12733	3.22151
BAE77235	yrbB	2.2909	2.06171	1.59356	1.61889	1.68722	1.23787	1.5929	1.57962	1.58378	1.76225	1.58371
BAA16346	dapE	1.8801	1.96149	2.11646	2.13992	2.17278	2.06598	2.09198	2.16398	2.24253	2.09846	2.08441
BAE77178	agaR	2.24625	2.23047	2.16258	2.16755	2.24175	2.01914	2.11766	2.22899	2.11412	2.19053	2.16507
BAA35742	hyaF	0.568481	0.57447	0.607874	0.742267	0.565321	0.653289	0.71965	0.684866	0.738736	0.494206	0.903695
BAE77467	yigP	2.08313	2.07848	2.16739	2.05074	2.27129	2.13029	2.13701	2.13893	2.13878	2.10045	2.04146
BAE77748	yhjX	0.779472	0.732658	0.922981	0.734191	0.774383	0.633893	0.569693	0.601144	0.532171	0.474506	0.625714
BAE77672	rfaF	2.09415	2.19025	2.42273	2.30793	2.48102	2.44567	2.43697	2.33683	2.42753	2.36908	2.37224
BAE78113	proP	2.40502	2.56616	2.98079	2.59328	2.65128	2.7294	2.69612	2.76729	2.74259	2.66066	2.63446
BAA15548	ynjE	1.48952	1.38822	1.48076	1.50495	1.51054	1.43785	1.5613	1.46216	1.95505	1.52316	1.51497
BAE76978	rpiA	2.94653	2.89026	2.86268	2.90249	2.88179	2.894	2.95227	2.88437	2.84593	2.92425	2.88956
BAE76989	fbaA	3.27813	3.15353	3.3327	3.29893	3.35589	3.27212	3.37324	3.34336	3.39957	3.38003	3.33739
BAE78048	zur	1.92837	1.98799	2.11538	2.01333	2.04849	1.96784	2.01892	2.12069	2.0694	1.99142	2.00557
BAA36045	dadX	1.7372	2.01016	1.60352	2.1583	1.9049	1.83065	2.03696	2.02887	2.0068	1.98698	2.1565
BAA35230	ybdL	2.07717	2.15234	2.294	2.091	1.93441	2.25876	2.08598	2.19673	2.30993	2.0638	2.07026
BAE77657	mutM	1.28748	1.11123	1.54113	1.39691	1.60332	1.53967	1.42579	1.34942	1.58756	1.62976	1.43056
BAE77534	hsrA	1.4372	1.23383	1.12374	1.23304	1.26455	1.15303	1.24483	1.26459	0.993342	1.09311	1.19559
BAB96741	yaeI	1.0359	0.826466	1.11305	1.04512	1.04363	1.0463	1.13797	1.04031	0.98016	0.747968	1.03567
BAE76656	narP	1.77693	1.66123	1.76618	1.79901	1.75438	1.7328	1.83746	1.64534	1.65924	1.87695	1.7663
BAA35382	ybgQ	0.102474	0.113985	-0.0675193	0.222577	-0.0405185	0.193085	-0.0304455	-0.12606	-0.0549353	0.197913	0.0661889
BAE76357	miaB	2.47723	2.51757	2.58147	2.50232	2.60338	2.65618	2.51057	2.49676	2.66475	2.66771	2.50288
BAA77866	yaeQ	1.87359	1.79307	1.94506	1.84025	1.71146	1.97614	1.81344	1.93407	1.91938	1.87119	1.87661
BAE77317	zraP	1.03132	1.24387	0.981541	1.03898	0.854417	0.926293	1.01386	1.06315	0.883128	0.912084	1.07732
BAA15069	ydcR	1.79724	1.72334	1.67496	1.77259	1.69363	1.78194	1.77646	1.80912	1.79707	1.75203	1.73987
BAA15530	ydjR	1.26948	0.79251	0.870587	0.984769	0.795357	0.601807	0.924111	0.653704	0.752965	0.645995	0.765368
BAE76485	ydgK	2.35133	2.21947	1.81385	1.71991	1.68955	1.69748	1.70683	1.74391	1.77353	1.90144	1.78089
BAA15424	purR	2.73768	2.65172	2.57154	2.6301	2.61956	2.59376	2.64553	2.65636	2.67954	2.72778	2.63109
BAE78366	yjjU	1.13487	1.35531	0.922552	1.51646	1.03879	0.880918	1.1274	1.42034	1.02824	0.993869	1.46221
BAE77742	tiaE	2.68688	2.62222	2.8937	2.73906	2.66172	2.74301	2.66482	2.70019	2.73732	2.90088	2.66268
BAE78159	poxA	1.69534	1.58716	1.60518	1.73232	1.79652	1.78178	1.67532	1.65505	1.83714	1.76201	1.64403
BAE77729	xylB	0.654845	0.717138	0.948321	0.753332	0.752199	0.934015	0.811307	0.670974	0.64466	0.62003	0.861727
BAE77203	yhbT	2.29498	2.17621	2.28885	2.36507	2.34827	2.23021	2.33263	2.39067	2.22574	2.27372	2.31581
BAA15319	ynfL	1.14026	1.21295	1.06006	1.15903	1.0933	1.14442	1.15335	1.12613	1.07102	1.09056	1.19003
BAE76906	galR	1.48291	1.67422	1.8636	1.78842	1.68765	1.69211	1.6643	1.76389	1.69598	1.68649	1.7308
BAA16318	amiA	2.2761	2.19146	2.15635	2.11253	2.14189	2.15616	2.16523	2.23071	2.16522	2.20077	2.0871
BAE76824	ispD	1.77037	1.68866	1.82384	1.89065	1.94604	1.91003	1.95117	1.90571	1.87948	1.83729	1.88728
BAE76821	surE	2.03636	1.98479	2.07168	2.13151	2.17725	2.2202	2.16962	2.19342	2.13485	2.06387	2.05361
BAA35898	plsX	2.47761	2.53818	2.42417	2.51154	2.42502	2.50389	2.49458	2.49621	2.54133	2.49006	2.50708
BAE77715	yiaN	0.252687	0.104992	-0.567867	-0.461125	-0.147314	0.23109	-0.419376	-0.24345	-0.146749	0.161783	0.135485
BAA15991	napF	1.40349	1.08328	1.11391	0.92056	1.20926	1.00597	1.20269	0.969506	1.7411	0.899419	1.19853
BAE76526	yeaK	2.3455	2.41514	2.45731	2.41643	2.21467	2.31996	2.31827	2.39411	2.34859	2.31515	2.32165
BAA35234	dsbG	1.83855	1.89452	2.0914	2.02099	2.16489	2.28741	2.01758	2.06879	2.16997	1.96866	1.98599
BAE78379	nadR	2.07776	2.10634	2.13781	2.19516	2.15016	1.53002	2.10281	2.23644	2.17665	2.13602	2.18691
BAE77774	yhjB	1.4102	1.46388	1.60251	1.54363	1.42545	1.2704	1.36108	1.52123	1.35068	1.53941	1.52563
BAA15405	ydhK	1.21135	1.14663	1.04112	1.05881	1.03405	0.976882	1.11473	1.00904	0.980216	1.11545	1.00769
BAE76965	yqfB	2.50438	2.2963	2.13177	2.04817	2.05068	1.87283	2.03377	2.15192	2.12615	2.06568	2.02776
BAE77671	rfaC	1.89106	1.88434	2.2263	2.13107	2.25875	2.20082	2.25861	2.13695	2.19322	2.20031	2.14797
BAA15619	pabB	1.52447	1.56674	1.80391	1.75964	1.80975	1.68273	1.68971	1.7364	1.7469	1.66936	1.7321
BAA16176	usg	1.94504	1.97883	2.08203	2.06599	2.09166	2.08202	2.09835	2.12093	2.0832	2.196	2.10076
BAE78154	ampC	1.538	1.41974	1.51402	1.56402	1.52075	1.50485	1.45692	1.49434	1.60375	1.44122	1.42657
BAA77908	frsA	1.66672	1.78378	1.78448	1.66707	1.71986	1.78002	1.69613	1.72725	1.8248	1.7418	1.75047
BAE77904	dam	2.03088	1.93816	1.91242	1.83213	1.98681	1.87945	1.82897	1.99974	1.99553	1.98419	1.841
BAE77067	yqhC	1.66572	1.71041	1.63856	1.55188	1.64616	1.58122	1.55888	1.60087	1.5779	1.64346	1.5321
BAE77724	xylR	1.49479	1.55234	1.58289	1.5418	1.68225	1.6173	1.57536	1.54479	1.60218	1.63259	1.53058
BAE76168	yaiI	1.9628	1.92401	1.91426	2.01611	1.88596	2.05534	1.90242	2.06445	2.02857	1.92885	1.9364
BAA14889	ycjQ	0.477548	0.472157	0.443388	0.664071	0.633137	0.746556	0.594895	0.432999	0.729519	0.666704	0.501723
BAA16447	yphC	1.03904	1.10511	1.1063	1.23624	1.19781	1.11762	1.08466	1.08123	1.06559	1.02716	1.13683
BAA77868	nlpE	2.0038	2.14225	2.11791	2.13116	2.1761	2.1905	2.14137	2.15892	2.06653	2.07121	2.12122
BAE78055	alr	1.75384	1.71591	2.08856	1.77783	1.86162	1.88715	1.8306	1.86385	1.93646	1.76521	1.82779
BAB96708	panD	3.26079	3.06889	3.28445	2.91984	3.04408	2.96566	2.98638	3.2186	3.34341	3.08221	2.93511
BAE76507	yniD	1.73493	1.71747	1.54427	1.22671	0.996948	1.28181	1.42957	1.39531	1.40765	1.40313	1.32001
BAA35589	aqpZ	1.46643	1.45836	1.22875	1.26954	1.19579	1.20225	1.27121	1.33533	1.16571	1.20279	1.33934
BAA14902	ycjX	1.74856	1.79791	1.87946	1.80176	1.78381	1.95867	1.86998	1.78096	1.96892	1.89109	1.74511
BAE78369	yjjI	0.733067	1.4263	1.57663	1.45909	1.4021	1.45557	1.51911	1.50001	1.70504	1.46472	1.5121
BAE78368	yjjW	0.746625	0.788302	1.08131	0.916379	0.76414	0.891563	0.95263	1.0357	1.1073	0.8318	0.944879
BAE77768	kdgK	2.00977	1.89143	2.42563	2.06428	2.14986	2.11771	2.1328	2.08368	2.21076	2.18663	2.08251
BAA16555	gshA	2.46519	2.43238	2.43751	2.51917	2.5517	2.45065	2.5373	2.55461	2.40306	2.40726	2.43864
BAA16225	dsdX	0.658553	0.672566	0.397613	0.471848	0.41642	0.352815	0.215513	0.3569	0.371099	0.390885	0.433971
BAE76665	napC	1.19888	1.08806	0.934679	1.13712	1.21858	1.11858	1.14409	1.06145	1.51694	0.917332	1.08436
BAA15281	ydfE	0.181973	-0.119042	-0.275081	-0.10587	2.65726	0.283133	-0.105894	0.0264579	0.317249	0.381103	0.212589
BAA35886	flgF	2.87951	0.321206	0.540918	0.63375	0.202215	0.49869	0.329329	0.538164	0.597972	0.57464	0.675788
BAE77207	mtr	1.80256	1.68486	1.51289	1.77986	1.7809	1.40055	1.65827	1.62838	1.36875	1.65425	1.72453
BAE77833	livJ	2.73471	2.75234	3.14984	3.014	3.01014	2.93905	2.95381	2.96586	2.85805	2.88083	2.79297
BAE77169	yhaB	-0.400477	0.214685	0.155755	-0.325549	0.226824	0.364484	0.515048	-0.75207	-0.0736417	0.121268	-0.00708968
BAE76737	yfhH	1.70365	1.76819	1.64312	1.75356	1.70277	1.63114	1.71385	1.71902	1.67899	1.72169	1.63781
BAE78380	yjjK	2.53326	2.58135	2.63129	2.66844	2.86064	2.76097	2.75815	2.67775	2.65868	2.76943	2.65752
BAE77394	pfkA	2.82551	2.9472	2.87733	3.0266	2.98697	2.9086	2.98165	2.91111	3.04824	3.05009	3.00452
BAB96657	ftsW	2.03481	2.04434	2.0625	1.96072	2.0378	1.86257	1.9554	2.05772	2.00488	2.0382	2.02551
BAA15169	ydeN	0.618142	0.875089	1.15637	1.06765	1.14701	1.49464	1.36086	0.68327	1.26772	1.19178	0.876929
BAE77830	ftsE	1.57887	1.6043	1.8423	1.6916	1.81307	1.74309	1.70741	1.76916	1.76824	1.62653	1.80633
BAB96693	yacL	2.03594	2.00371	2.32905	2.11101	2.19022	2.03796	2.19799	2.31288	2.18176	2.22046	2.18109
BAA15575	yeaA	2.50111	2.47013	2.68735	2.63507	2.34243	2.64024	2.58068	2.67269	2.50036	2.56401	2.60419
BAE76172	yaiE	3.04611	2.90073	2.81851	2.67474	2.63199	2.76434	2.57412	2.75356	2.82349	2.82618	2.73447
BAA15900	wcaJ	0.285751	0.303887	0.170727	-0.0180628	0.00474873	0.213743	0.202653	0.176734	-0.145202	0.307728	0.335331
BAE78210	ytfE	0.873211	0.881444	0.725667	0.819505	0.910975	0.688304	0.779326	0.749054	0.807994	0.82204	0.922105
BAA15047	ydcH	1.46015	1.31956	1.01549	0.355693	0.908065	0.851635	0.68007	0.956946	1.07231	0.589525	0.632379
BAE78352	dnaT	2.09622	2.1282	2.04296	2.08844	2.11793	2.09374	2.10208	1.98749	2.05067	2.05142	2.13099
BAE77289	rng	2.29907	2.31606	2.34931	2.41092	2.53856	2.38674	2.4185	2.36578	2.29395	2.39396	2.3453
BAA36104	galU	2.67718	2.51656	2.4861	2.41928	2.28973	2.59336	2.43483	2.5625	2.62465	2.65582	2.43919
BAE77198	yraR	0.904401	0.930015	1.19251	1.02748	1.04265	0.886239	1.14071	1.12503	0.936278	0.69242	1.14167
BAE77089	yqiB	1.70483	1.88527	1.71602	1.87792	1.93753	1.83154	1.85384	1.90022	1.74632	1.67839	1.80408
BAA16360	hyfB	0.655328	0.595869	0.204531	0.423928	0.193672	0.392564	0.308867	0.48449	0.171358	0.189326	0.342717
BAA14927	fnr	3.07672	3.02828	3.04123	3.0221	3.04029	3.10053	3.06729	3.08477	3.08067	3.1202	3.01638
BAA35685	ssuB	1.03648	1.12405	1.22277	1.24265	1.14762	1.37574	1.23286	1.14007	1.185	1.09028	1.26569
BAE77587	trmE	1.98066	2.07341	2.08652	2.20633	2.17848	2.2281	2.24618	2.09839	2.06296	2.20091	2.13353
BAE76886	amiC	2.11516	2.05081	1.94842	2.21382	2.13836	1.93759	2.11566	2.07354	1.87886	2.02366	2.13583
BAA35815	ycdX	2.24721	2.36443	2.56716	2.48305	2.51402	2.6739	2.44505	2.56819	2.64492	2.55163	2.48631
BAA35338	ybfG	0.558329	0.649953	0.751428	0.516582	0.535481	0.8597	0.685967	0.689646	0.902912	0.938247	0.327144
BAA15576	gapA	4.04287	3.93719	3.96317	4.13751	4.0027	4.0695	4.04117	4.07181	4.18305	4.07685	4.02458
BAE78164	psd	2.33584	2.39517	2.43902	2.52984	2.50385	2.48091	2.50982	2.45424	2.57529	2.52546	2.50691
BAA16556	yqaA	2.23357	2.13388	2.24794	2.34444	2.41768	2.3346	2.38205	2.38198	2.24603	2.24582	2.27794
BAE78112	yjcZ	1.31053	0.863383	1.76534	1.3565	1.50922	1.69631	1.48635	1.64662	1.5406	1.30783	1.34187
BAA35735	yccA	3.28576	3.04843	2.76101	2.87384	2.91963	3.03261	2.8421	2.791	3.08765	2.97152	2.87559
BAA35425	modE	1.62407	1.67348	1.89807	1.89453	1.88338	1.89512	1.82662	1.9087	1.972	1.89795	1.89216
BAE78122	melB	0.995967	0.928735	0.799216	0.932992	0.88088	0.790326	0.749968	0.939141	0.821983	0.744824	0.82764
BAA15383	rsxB	1.86529	1.86837	1.79508	1.70495	1.43452	1.62899	1.62604	1.82081	1.63443	1.88748	1.65408
BAE78171	mutL	1.67338	1.8297	1.93761	1.87553	1.90846	1.95353	1.87487	1.85718	1.8093	1.78215	1.89498
BAA77906	pepD	2.66071	2.63444	2.697	2.75808	2.63278	2.78342	2.67216	2.75868	2.75054	2.70833	2.74365
BAE77221	folP	1.66082	1.73061	1.80366	1.74739	1.84426	1.61793	1.82009	1.79844	1.72939	1.72277	1.77998
BAB96683	pdhR	2.52598	2.59717	2.47885	2.70026	2.58616	2.62047	2.62271	2.54489	2.62173	2.60119	2.63831
BAE77001	speA	2.82417	2.71711	2.81339	2.68078	2.90778	2.64764	2.72008	2.80649	2.83754	2.80061	2.67807
BAA16463	yfhG	1.67276	1.66773	1.70566	1.78465	1.78815	1.79778	1.78053	1.71094	1.70721	1.70108	1.74622
BAA16269	yfeC	2.10111	1.85613	1.89388	1.93599	1.87221	1.78919	1.83326	2.01045	1.88657	1.8355	1.91148
BAE78233	mpl	2.35613	2.38319	2.49866	2.48074	2.52066	2.50942	2.46989	2.4575	2.50947	2.51814	2.47791
BAA15403	slyA	2.75669	2.76329	2.66	2.70453	2.75366	2.74855	2.71345	2.74055	2.73539	2.76027	2.70673
BAE77315	zraR	1.1603	1.18101	1.46692	1.26789	1.39373	1.25221	1.30712	1.31515	1.3002	1.19796	1.33191
BAE76894	ppdB	0.853014	0.83286	0.752094	0.858836	0.785606	0.665523	0.942715	0.87335	0.693909	0.56061	0.8261
BAA16058	glpQ	1.66445	1.66433	1.60917	1.69016	1.59986	1.56391	1.60435	1.6708	1.58136	1.59045	1.6575
BAE76586	yohL	2.01305	2.15899	1.9815	2.05189	2.17117	1.91811	2.07462	2.09025	2.3253	1.96619	2.02625
BAB96673	guaC	2.96591	2.80494	2.64005	2.87465	2.96242	2.78716	2.88579	2.88659	2.74656	2.78269	2.88221
BAA77869	yaeF	1.23089	1.21918	0.892061	0.969912	0.917245	0.651616	0.791791	0.913371	0.948444	0.765616	0.950501
BAA36015	ycgN	2.196	2.17152	2.01315	2.06309	1.99753	1.9979	1.9806	2.10799	2.29791	2.05848	1.99249
BAE76878	ygdE	1.93654	1.89501	1.87956	1.8835	1.9179	1.78505	1.827	1.89296	1.83421	1.84405	1.88781
BAE76631	yeiG	2.37351	2.37078	2.51212	2.45373	2.10477	2.29076	2.33991	2.45076	2.27056	2.26031	2.37806
BAE77015	yggT	2.2784	2.29946	2.1594	2.22418	2.38068	2.21076	2.24928	2.18446	2.25725	2.31323	2.24351
BAE77893	yrfF	2.08429	1.7925	1.82151	1.76005	1.86367	1.76706	1.80757	1.8704	1.82905	1.76556	1.74964
BAE78166	orn	2.56141	2.53875	2.50684	2.50614	2.54437	2.4968	2.52505	2.52502	2.61713	2.6067	2.58684
BAE77133	ygjN	1.3312	1.19974	1.58098	1.49484	1.55382	1.60505	1.52489	1.37224	1.51844	1.44609	1.32328
BAE77010	gshB	1.84905	1.9909	2.267	2.30597	2.32892	2.2734	2.27036	2.2796	2.24488	2.26975	2.30304
BAE77175	garD	0.97814	1.07457	1.22015	1.15443	1.20234	1.15052	1.20259	1.12972	1.09386	1.10116	1.07596
BAE77416	fdoH	1.35493	1.39258	1.72248	1.75533	1.6979	1.68022	1.68071	1.37414	1.66515	1.58787	1.73909
BAA16048	gyrA	2.18032	2.25435	2.43787	2.48877	2.38854	2.44968	2.46831	2.43738	2.37811	2.58533	2.52648
BAA15730	tyrP	1.86432	0.736871	0.427402	0.572498	0.474355	0.600542	0.275848	0.645776	0.392991	0.572542	0.558056
BAE77476	pldB	2.25954	2.30086	2.14512	2.17726	2.23589	2.10369	2.15179	2.14949	2.11984	2.17027	2.20379
BAE76645	yeiU	2.17457	1.74671	1.93526	1.9624	1.58694	1.74251	2.0435	2.04146	1.97204	1.99324	1.81917
BAE77499	hemY	2.20537	2.16267	2.30557	2.33138	2.36553	2.36639	2.29068	2.3127	2.20485	2.1897	2.29406
BAE76348	entC	1.05227	1.4293	0.970954	1.92217	1.60858	1.66042	2.04774	1.80535	0.770339	1.46901	1.38907
BAE77903	damX	2.73276	2.73373	2.87395	2.85283	2.94006	2.8574	2.83494	2.88298	2.88282	2.85332	2.81492
BAB96652	ftsI	2.17267	2.17535	2.05213	1.95434	2.0118	1.84121	1.9521	2.09479	1.99158	2.01049	2.01149
BAE78076	nrfE	0.623311	0.389569	-0.00997157	-0.0744407	-0.0531424	0.155548	0.197004	0.200207	-0.158004	0.0713461	0.456731
BAE77164	tdcD	0.410109	0.675731	0.499122	0.641104	0.996584	0.871144	0.945046	0.760138	0.781205	1.06456	0.650107
BAA15024	azoR	2.21113	2.15386	2.22786	2.24438	2.12757	2.33778	2.18791	2.26192	2.37278	2.24436	2.1834
BAB96643	leuA	2.74249	3.18401	2.91983	3.28998	3.37433	3.03216	3.27714	3.18727	3.00781	3.07095	3.18554
BAA35929	mfd	2.00727	2.12942	2.18196	2.23129	2.28477	2.29741	2.23613	2.20934	2.31209	2.14889	2.22846
BAE77065	metC	2.47553	2.6207	2.87312	2.6789	2.55454	2.58433	2.62235	2.76923	2.71556	2.55913	2.60639
BAA35226	fes	0.807555	1.08113	0.669082	1.2846	1.17278	1.16441	1.53518	1.42256	0.198521	1.08358	1.02066
BAE77844	ugpQ	1.81508	1.93373	1.9369	1.93314	2.02481	1.8958	2.03887	1.95538	1.90371	1.92826	1.92053
BAE78114	basS	1.35762	1.30322	1.36108	1.28433	1.23631	1.24363	1.29943	1.37477	1.18278	1.13747	1.34688
BAA36032	dsbB	2.76092	2.2595	1.98774	1.87713	1.81133	1.95006	1.94816	2.03691	2.07827	2.02959	1.96107
BAA14785	yciA	2.49619	2.31141	2.17264	2.26141	2.37453	2.20693	2.22935	2.37808	2.51278	2.36775	2.28544
BAE78179	yjeB	1.37292	1.3664	1.52718	1.51337	1.42637	1.45633	1.43568	1.49922	1.46372	1.44715	1.47836
BAA16129	yfbT	2.60392	2.57991	2.59062	2.59649	2.65658	2.52033	2.52686	2.56508	2.71687	2.67531	2.56158
BAE77914	yhfT	0.567105	0.605776	0.455282	0.423643	0.496819	0.522497	0.46062	0.273047	0.250628	0.550643	0.628805
BAE77397	cpxR	2.63382	2.74422	2.58186	2.75712	2.79044	2.49119	2.69415	2.61296	2.68645	2.56036	2.70756
BAA15618	yoaB	3.138	3.00319	2.85836	2.83023	2.70261	2.75738	2.78421	2.84035	2.89561	2.84954	2.79082
BAE76858	relA	1.7914	1.92417	2.09697	2.04195	2.13497	1.9697	2.04348	2.02933	1.95392	1.97531	2.06008
BAA35832	csgA	1.05718	1.38825	1.07692	1.3336	1.21539	1.55445	1.3821	1.39652	1.39145	1.56567	1.56017
BAA35941	ycfZ	0.807314	0.754608	0.719254	0.710468	0.660781	0.782518	0.88057	0.51705	0.942916	0.86512	0.708438
BAE76912	kduI	0.679678	0.911055	1.24285	0.89602	1.01265	0.939505	1.13063	1.15564	0.909203	1.29864	0.845936
BAE76176	araJ	1.58675	1.49895	1.30326	1.11637	1.18826	1.14748	1.09123	1.24307	1.35149	1.17473	1.1494
BAE76898	ptsP	2.06758	2.17833	2.28298	2.30415	2.26253	2.20195	2.26292	2.28311	2.18707	2.23849	2.33585
BAE76722	ypfH	1.92694	1.87126	1.8223	1.9006	1.84105	1.67783	1.8997	1.90291	1.82709	1.69221	1.90146
BAA15124	fdnH	0.431462	0.598536	0.568841	0.388568	0.475702	0.655136	0.390726	0.482907	0.59202	0.471886	0.586861
BAA16291	crr	3.49506	3.50535	3.38054	3.31871	3.23866	3.22676	3.27153	3.36978	3.43142	3.5091	3.29309
BAA16087	yfbB	0.576504	0.0969447	0.470046	0.0661939	0.250187	0.128591	0.156398	0.2214	0.303119	0.241541	0.379155
BAE77323	nudC	1.99952	1.90573	2.06432	2.19323	2.17161	2.03091	2.13786	2.10444	2.1094	2.12363	2.10596
BAE78146	yjeI	3.09681	3.07878	2.96513	2.91453	2.93732	2.86454	2.90168	2.993	2.99592	2.96454	3.02929
BAE78008	yrdD	2.18982	2.06022	1.94483	2.03125	2.1453	1.94716	1.96737	2.10577	2.09112	2.00601	2.03705
BAE76190	yajD	2.44646	2.30879	2.45023	2.26154	2.35	2.35218	2.31444	2.44936	2.63977	2.31586	2.32799
BAE78387	creB	1.53173	1.39765	1.63404	1.6408	1.55273	1.78431	1.57134	1.7733	1.66125	1.54287	1.59863
BAE77564	phoU	2.05139	2.00003	2.20102	2.11808	1.87469	2.19539	2.08515	2.19709	2.07713	2.2068	2.09587
BAA15177	ydeS	0.35732	0.164225	0.163054	0.430906	-0.416392	0.453147	0.234094	0.390562	0.424793	0.400601	0.366406
BAE78067	yjcE	1.72122	1.66879	1.69706	1.74434	1.71012	1.69579	1.74942	1.71261	1.75056	1.66449	1.77162
BAE77173	garL	0.475222	0.614782	0.944198	0.869058	1.04747	0.746655	0.876397	0.603663	0.639497	0.66008	0.54237
BAA15674	ruvC	2.33855	2.19142	2.31967	2.26586	2.36985	2.23429	2.28651	2.26012	2.31287	2.37382	2.26237
BAA15315	dmsD	1.86383	1.78829	1.94778	1.7911	1.72694	1.84006	1.83486	1.86219	1.95393	1.76743	1.78571
BAE76707	yfdY	1.60747	1.89025	2.002	1.92173	1.94411	1.98816	1.85302	1.7785	1.79557	1.71656	1.86469
BAA14998	paaE	0.469788	0.773691	0.801745	0.87857	0.709979	0.887615	0.842899	0.76525	0.84173	0.789379	0.768579
BAA15908	fcl	-0.0870343	0.0283006	-0.0968286	-0.126587	0.340437	0.0683257	0.0032074	0.0541954	-0.0480738	0.406002	0.231463
BAA16471	yfiM	1.53852	1.62961	1.74757	1.63076	1.68509	1.47077	1.56873	1.70337	1.52078	1.7855	1.61313
BAA16401	hisS	2.64177	2.68108	2.85325	2.79037	2.90864	2.81035	2.84281	2.80894	2.81952	2.82646	2.77817
BAE78392	yjtD	1.54899	1.62943	1.79334	1.90003	1.84813	1.7871	1.84699	1.76312	1.82737	1.7789	1.79776
BAE76800	hycC	0.46475	0.290285	0.0779549	-0.281829	-0.13131	0.416503	0.0406404	0.0528877	-0.412881	-0.359622	-0.0279178
BAE76520	ynjA	1.44557	1.5155	1.36634	1.4683	1.28769	1.38622	1.40343	1.29314	1.41004	1.33864	1.37654
BAE77882	feoB	1.79451	1.97032	1.55742	2.00797	1.9453	1.84779	2.02392	1.93038	1.62309	1.98329	1.89783
BAA16321	yffI	1.51	1.51313	1.36305	1.41533	1.47983	1.23642	1.34326	1.24764	1.24972	1.42493	1.47224
BAE78072	nrfA	0.873568	0.919416	1.12157	0.831193	1.03641	0.96526	1.05285	0.997054	1.25729	0.91666	0.867133
BAE77196	yraP	2.44175	2.29177	2.24708	2.2581	2.3691	2.11659	2.31644	2.26506	2.17076	2.25326	2.21313
BAE76881	ygdI	2.39877	2.02411	1.67118	1.88487	1.67758	1.45584	1.73339	2.26341	1.58562	1.73156	1.90691
BAA35909	fhuE	0.874793	1.11405	0.703316	1.22442	0.785598	0.930321	1.10691	1.24077	0.714223	1.02505	0.987029
BAE76353	citG	-0.530455	0.00732804	-0.0452457	-0.687659	-0.396726	-0.0183223	-0.606319	-0.279878	-0.634722	-0.676422	-0.0285792
BAA36088	ychP	1.31274	1.33271	1.63719	1.4934	1.32217	1.45017	1.38543	1.55202	1.46286	1.45596	1.43236
BAA14958	ydaV	0.179569	0.40025	0.706286	0.751606	0.548036	0.892967	0.745198	0.562825	0.712281	0.748463	0.807829
BAA35889	flgI	2.51556	0.365634	0.169272	0.197622	0.240341	0.401776	0.219616	0.237131	0.22021	0.303345	0.0944737
BAE77182	agaS	-0.0380693	0.0191803	0.175051	0.307691	0.360064	0.405075	0.164163	0.338273	-0.0147543	0.38972	0.285478
BAB96580	thrB	2.68367	2.87946	3.03746	3.03583	3.11103	3.24017	3.04111	3.02136	3.01658	3.29822	2.99104
BAA35703	ycbY	1.98138	2.05566	2.09079	2.15201	2.05299	2.27608	2.14664	2.11547	2.22129	2.19466	2.12575
BAA35944	potC	1.60878	1.57543	1.95635	1.87968	1.69178	2.01932	1.92819	1.79582	1.96519	1.91206	1.80963
BAE76522	ynjF	1.77451	1.73381	1.61968	1.65676	1.59441	1.39227	1.57844	1.63417	1.60031	1.4405	1.5461
BAA35657	ycaI	0.836644	0.801956	0.707525	0.703914	0.599873	0.755206	0.726736	0.635408	0.655759	0.670667	0.634694
BAA35283	ybeA	1.92059	1.9584	2.16113	2.13014	2.13507	2.25041	2.14192	2.09717	2.19381	2.12365	2.04556
[truncated: 1,291 more rows]
